# Supplementary material
Source: PubMed Central journal article supplement (PMC4238229)

## Supplementary Information

# Tactics for Probing Aryne Reactivity: Mechanistic Studies of Silicon-oxygen Bond Cleavage During the Trapping of (HDDA-generated) Benzyne by Silyl Ethers

Thomas R. Hoye\*, Beeraiah Baire, and Tao Wang

\*To whom correspondence should be addressed. e-mail: hoye@umn.edu

*Department of Chemistry  
University of Minnesota  
207 Pleasant St. SE  
Minneapolis, MN 55455*

| <b>Contents of Supplementary Information</b>                                     | <b>Page #</b> |
|----------------------------------------------------------------------------------|---------------|
| <b>A. General Experimental Protocols</b>                                         | 4             |
| <b>B. Preparation procedures and characterization data for all key compounds</b> | 5 – 24        |
| Synthesis of <b>5</b> (Scheme 2)                                                 | 5             |
| Synthesis of <b>6a</b> (Scheme 2, via <b>5</b> )                                 | 6             |
| Synthesis of <b>6b</b> (Scheme 2, via <b>5</b> )                                 | 7             |
| Synthesis of <b>6c</b> (Scheme 2, <b>5</b> )                                     | 8             |
| Synthesis of <b>7a</b> (Scheme 2, via <b>6a</b> )                                | 9             |
| Synthesis of <b>7b</b> (Scheme 2, via <b>6b</b> )                                | 10            |
| Synthesis of <b>7c</b> and <b>9</b> (Scheme 2, via <b>6c</b> )                   | 11 – 12       |
| Synthesis of <b>S1</b> (via <b>5</b> )                                           | 13            |
| Synthesis of <b>6d</b> (via <b>S1</b> )                                          | 14            |
| Synthesis of <b>7d</b> and <b>7d'</b> (Scheme 3, panel B, via <b>6d</b> )        | 15 – 16       |
| Synthesis of <b>10a</b> (Scheme 4, via <b>6a</b> )                               | 18            |
| Synthesis of <b>10b</b> (Scheme 4, via <b>6b</b> )                               | 19            |
| Synthesis of <b>10c</b> (Scheme 4, via <b>6c</b> )                               | 20            |
| Synthesis of <b>12</b>                                                           | 21            |
| Synthesis of <b>13</b> (Scheme 5, via <b>12</b> )                                | 22            |
| Synthesis of <b>14</b> (Scheme 5, via <b>12</b> )                                | 23 – 24       |
| <b>C. Computational Methodology.</b>                                             |               |

D. Computed (DFT) Cartesian coordinates and energies for each computed structure using the three basis sets: 6-311G(d,p), 6-31G(d), and ccpVTZ..

|                                                                                            |         |
|--------------------------------------------------------------------------------------------|---------|
| <b>8-TS</b>                                                                                | 26 – 27 |
| <b>I</b>                                                                                   | 28 – 30 |
| <b>II</b>                                                                                  | 31 – 33 |
| <b>III</b>                                                                                 | 34 – 36 |
| <b>IV</b>                                                                                  | 37 – 39 |
| <b>V</b>                                                                                   | 40 – 42 |
| <b>VI</b>                                                                                  | 43 – 45 |
| <b>VII</b>                                                                                 | 46 – 48 |
| <b>VIII</b>                                                                                | 49 – 51 |
| <b>E. Reference for Supplementary Information</b>                                          | 52      |
| <b>F. Copies of <sup>1</sup>H and <sup>13</sup>C NMR spectra of each isolated compound</b> | 53 – 86 |
| <sup>1</sup> H NMR spectrum of <b>6a</b>                                                   | 53      |
| <sup>13</sup> C NMR spectrum of <b>6a</b>                                                  | 54      |
| <sup>1</sup> H NMR spectrum of <b>6b</b>                                                   | 55      |
| <sup>13</sup> C NMR spectrum of <b>6b</b>                                                  | 56      |
| <sup>1</sup> H NMR spectrum of <b>6c</b>                                                   | 57      |
| <sup>13</sup> C NMR spectrum of <b>6c</b>                                                  | 58      |
| <sup>1</sup> H NMR spectrum of <b>7a</b>                                                   | 59      |
| <sup>13</sup> C NMR spectrum of <b>7a</b>                                                  | 60      |
| <sup>1</sup> H NMR spectrum of <b>7b</b>                                                   | 61      |
| <sup>13</sup> C NMR spectrum of <b>7b</b>                                                  | 62      |
| <sup>1</sup> H NMR spectrum of <b>7c</b>                                                   | 63      |
| <sup>13</sup> C NMR spectrum of <b>7c</b>                                                  | 64      |
| <sup>1</sup> H NMR spectrum of the mono-TBS ether <b>S1</b>                                | 65      |
| <sup>13</sup> C NMR spectrum of mono-TBS ether <b>S1</b>                                   | 66      |
| <sup>1</sup> H NMR spectrum of <b>6d</b>                                                   | 67      |
| <sup>13</sup> C NMR spectrum of <b>6d</b>                                                  | 68      |
| <sup>1</sup> H NMR spectrum of <b>7d</b>                                                   | 69      |
| <sup>13</sup> C NMR spectrum of <b>7d</b>                                                  | 70      |
| <sup>1</sup> H NMR spectrum of <b>7d'</b>                                                  | 71      |
| <sup>13</sup> C NMR spectrum of <b>7d'</b>                                                 | 72      |
| <sup>1</sup> H NMR spectrum of <b>9</b>                                                    | 73      |
| <sup>13</sup> C NMR spectrum of <b>9</b>                                                   | 74      |
| <sup>1</sup> H NMR spectrum of <b>10a</b>                                                  | 75      |
| <sup>13</sup> C NMR spectrum of <b>10a</b>                                                 | 76      |
| <sup>1</sup> H NMR spectrum of <b>10b</b>                                                  | 77      |

|                                            |    |
|--------------------------------------------|----|
| <sup>13</sup> C NMR spectrum of <b>10b</b> | 78 |
| <sup>1</sup> H NMR spectrum of <b>10c</b>  | 79 |
| <sup>13</sup> C NMR spectrum of <b>10c</b> | 80 |
| <sup>1</sup> H NMR spectrum of <b>12</b>   | 81 |
| <sup>13</sup> C NMR spectrum of <b>12</b>  | 82 |
| <sup>1</sup> H NMR spectrum of <b>13</b>   | 83 |
| <sup>13</sup> C NMR spectrum of <b>13</b>  | 84 |
| <sup>1</sup> H NMR spectrum of <b>14</b>   | 85 |
| <sup>13</sup> C NMR spectrum of <b>14</b>  | 86 |

## General Experimental Protocols

$^1\text{H}$  and  $^{13}\text{C}$  NMR spectra were recorded on Varian Inova 500 (500 MHz) and Bruker Avance 500 (500 MHz) spectrometers.  $^1\text{H}$  NMR chemical shifts in  $\text{CDCl}_3$  are referenced to TMS ( $\delta$  0.00 ppm). Non-first order multiplets are identified as "nfom".  $^{13}\text{C}$  NMR chemical shifts in  $\text{CDCl}_3$  are referenced to chloroform ( $\delta$  77.16 ppm). TMS is present in some  $^{13}\text{C}$  NMR samples ( $\delta$  ca. 0.0 ppm). The following format is used to report resonances: chemical shift in ppm [multiplicity, coupling constant(s) in Hz, integral, and assignment].  $^1\text{H}$  NMR assignments are indicated by structure environment (e.g.,  $\text{CH}_2\text{CH}_3$ ). Infrared spectra were recorded on a Midac Corporation Prospect 4000 FT-IR spectrometer. The most intense and/or diagnostic peaks are reported, and all spectra were collected in attenuated total reflectance (ATR) mode as thin films on a  $45^\circ$  germanium window. High-resolution mass spectrometry (HRMS) measurements were made on via electrospray ionization (ESI) on a Bruker BioTOF II (ESI-TOF) instrument using PEG or PPG as an internal standard/calibrant. Samples were introduced as solutions in methanol or acetonitrile. MPLC refers to medium pressure liquid chromatography (25-200 psi) using hand-packed columns of Silasorb silica gel (18-32  $\mu\text{m}$ , 60  $\text{\AA}$  pore size), a Waters HPLC pump, a Waters R401 differential refractive index detector, and a Gilson 116 UV detector. Flash chromatography was performed using E. Merck silica gel (230-400 mesh). Thin layer chromatography was performed on plastic-backed plates of silica gel and visualized by UV detection and/or a solution of phosphomolybdic acid. Piperidine for cross-coupling reactions was degassed by purging with  $\text{N}_2$  gas immediately prior to use. Anhydrous methylene chloride was taken immediately prior to use after being passed through a column of activated alumina. Chloroform was stored over 4 $\text{\AA}$  molecular sieves prior to use as a reaction solvent. Reported (external) reaction temperatures are the temperature of the heating bath. HDDA reactions, including those that were carried out at temperatures above the boiling point of the solvent, were typically performed in a screw-capped vial or culture tube fitted with an inert, teflon-lined cap. Those carried out in deuterated solvents were often performed directly in a capped 5 mm NMR sample tube.

***N,N*-bis(7-Hydroxyhepta-2,4-diyn-1-yl)-4-methylbenzenesulfonamide (**5**, prepared by the method reported in ref<sup>[1]</sup>)**

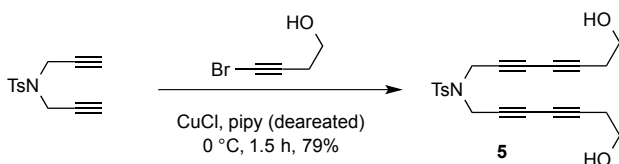

CuCl (20 mg, 0.2 mmol) was added to a solution of 4-methyl-*N,N*-di(prop-2-yn-1-yl)benzenesulfonamide<sup>2</sup> (247 mg, 1.0 mmol) and 4-bromo-3-butyn-1-ol<sup>3</sup> (326 mg, 2.2 mmol) in freshly deaerated piperidine (2 mL, 0.5 M) at 0 °C. After 1.5 h the reaction mixture was partitioned between EtOAc (20 mL) and saturated aqueous NH<sub>4</sub>Cl (20 mL). The aqueous phase was extracted twice with EtOAc (2 x 15 mL) and the combined organic extracts were washed with brine (10 mL), dried over MgSO<sub>4</sub>, and concentrated. Purification by flash column chromatography (1:2, hexanes-EtOAc) gave the tetrayne diol **5** (302 mg, 0.79 mmol, 79%).

**<sup>1</sup>H NMR** (500 MHz, CDCl<sub>3</sub>): δ 7.69 (2H, d, *J* = 8.0 Hz, Ar-H), 7.33 (2H, d, *J* = 8.0 Hz, Ar-H), 4.18 (4H, s, N-CH<sub>2</sub>), 3.73 (4H, t, *J* = 6.5 Hz, CH<sub>2</sub>OH), 2.52 (4H, t, *J* = 6.5 Hz, CH<sub>2</sub>CH<sub>2</sub>OH), 2.43 (3H, s, Ar-CH<sub>3</sub>), and 2.04 (1H, br s, OH).

**<sup>13</sup>C NMR** (125 MHz, CDCl<sub>3</sub>): δ 144.4, 134.7, 129.8, 128.0, 77.3, 70.8, 68.8, 66.0, 60.7, 37.4, 23.7, and 21.7 ppm.

**IR** (neat): 3349 (OH), 2943, 2888, 1597, 1420, 1348, 1160, 1045, 815, and 750 cm<sup>-1</sup>.

**HR ESI-MS**: [C<sub>21</sub>H<sub>21</sub>NNaO<sub>4</sub>S]<sup>+</sup> requires 406.1083; found 406.1072.

**TLC**: R<sub>f</sub> = 0.4 (1:2, Hex/EtOAc).

***N,N*-bis- $\{7-[(\text{Triethylsilyl})\text{oxy}]\text{hepta-2,4-diyne-1-yl}\}$ -4-methylbenzenesulfonamide (**6a**)**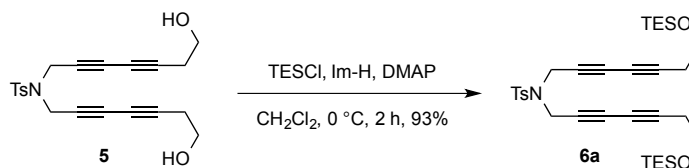

TESCl (69 mg, 0.46 mmol) was added to a solution of imidazole (31 mg, 0.46 mmol), DMAP (5 mg, 0.037 mmol), and diol **5** (70 mg, 0.183 mmol) in DCM (3 mL) at 0 °C with stirring. After 2 h the reaction mixture was diluted with water (10 mL) and extracted with CH<sub>2</sub>Cl<sub>2</sub> (2 x 20 mL). The combined organic extracts were washed with brine, dried (MgSO<sub>4</sub>), and concentrated. Purification by flash column chromatography (9:1, hexanes:EtOAc) gave the bis-TES-ether **6a** (103 mg, 0.17 mmol, 93%) as a pale yellow oil.

**<sup>1</sup>H NMR** (500 MHz, CDCl<sub>3</sub>): δ 7.68 (2H, d, *J* = 8.5 Hz, Ar-H), 7.32 (2H, d, *J* = 8.5 Hz, Ar-H), 4.17 (4H, s, N-CH<sub>2</sub>), 3.71 (4H, t, *J* = 7.0 Hz, CH<sub>2</sub>OTES), 2.46 (4H, t, *J* = 7.0 Hz, CH<sub>2</sub>CH<sub>2</sub>OTES), 2.43 (3H, s, Ar-CH<sub>3</sub>), 0.96 [18H, s, SiCH<sub>2</sub>CH<sub>3</sub>], and 0.60 [12H, s, SiCH<sub>2</sub>CH<sub>3</sub>].

**<sup>13</sup>C NMR** (125 MHz, CDCl<sub>3</sub>): δ 144.3, 134.8, 129.8, 127.9, 77.8, 71.0, 68.3, 65.5, 61.1, 37.3, 23.7, 21.7, 6.8 and 4.5 ppm.

**IR** (neat): 2954, 2910, 2856, 2260, 1598, 1459, 1414, 1356, 1327, 1237, 1165, 1094, 1056, 1015, 1007, 903, and 813 cm<sup>-1</sup>.

**HR ESI-MS**: [C<sub>33</sub>H<sub>49</sub>NNaO<sub>4</sub>SSi<sub>2</sub>]<sup>+</sup> requires 634.2813; found 634.2845.

**TLC**: R<sub>f</sub> = 0.4 (9:1 Hex/EtOAc).

***N,N*-bis{7-[(*tert*-Butyldimethylsilyl)oxy]hepta-2,4-diyne-1-yl}-4-methylbenzenesulfonamide (6b)**

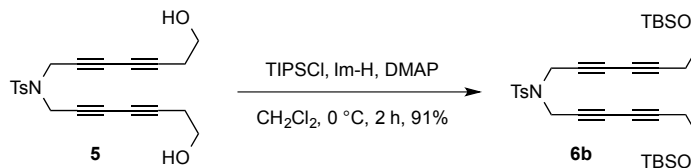

TBSCl (60 mg, 0.40 mmol) was added to a solution of imidazole (28 mg, 0.40 mmol), DMAP (4 mg, 0.031 mmol), and diol **5** (60 mg, 0.157 mmol) in DCM (3 mL) at 0 °C with stirring. After 2 h the reaction mixture was diluted with water (10 mL) and extracted with CH<sub>2</sub>Cl<sub>2</sub> (2 x 20 mL). The combined organic extracts were washed with brine, dried (MgSO<sub>4</sub>), and concentrated. Purification by flash column chromatography (9:1, hexanes:EtOAc) gave the bis-TBS-ether **6b** (87 mg, 0.143 mmol, 91%) as a pale yellow oil.

**<sup>1</sup>H NMR** (500 MHz, CDCl<sub>3</sub>): δ 7.68 (2H, d, *J* = 8.5 Hz, Ar-H), 7.32 (2H, d, *J* = 8.5 Hz, Ar-H), 4.17 (4H, s, N-CH<sub>2</sub>), 3.71 (4H, t, *J* = 7.0 Hz, CH<sub>2</sub>OTBS), 2.45 (4H, t, *J* = 7.0 Hz, CH<sub>2</sub>CH<sub>2</sub>OTBS), 2.43 (3H, s, Ar-CH<sub>3</sub>), 0.89 [18H, s, SiC(CH<sub>3</sub>)<sub>3</sub>], and 0.07 [12H, s, Si<sup>*i*</sup>Bu(CH<sub>3</sub>)<sub>2</sub>].

**<sup>13</sup>C NMR** (125 MHz, CDCl<sub>3</sub>): δ 144.2, 134.9, 129.8, 127.9, 78.0, 71.0, 68.3, 65.5, 61.4, 37.3, 26.0, 23.8, 21.7, 18.4, and -5.2 ppm.

**IR** (neat): 2954, 2930, 2857, 2261, 1598, 1469, 1357, 1275, 1259, 1165, 1105, 1007, 905, 839, 814, 766, 754, and 677 cm<sup>-1</sup>.

**HR ESI-MS**: [C<sub>33</sub>H<sub>49</sub>NNaO<sub>4</sub>SSi<sub>2</sub>]<sup>+</sup> requires 634.2813; found 634.2829.

**TLC**: R<sub>f</sub> = 0.4 (9:1 Hex/EtOAc).

***N,N*-bis{7-[(Triisopropylsilyloxy)hepta-2,4-diyne-1-yl]}-4-methylbenzenesulfonamide (6c)**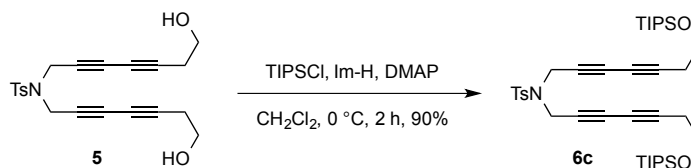

TIPSCl (90 mg, 0.471 mmol) was added to a solution of imidazole (32 mg, 0.471 mmol), DMAP (6 mg, 0.05 mmol), and diol **5** (60 mg, 0.157 mmol) in DCM (3 mL) at 0 °C with stirring. After 2 h the reaction mixture was diluted with water (10 mL) and extracted with CH<sub>2</sub>Cl<sub>2</sub> (2 x 20 mL).

The combined organic extracts were washed with brine, dried (MgSO<sub>4</sub>), and concentrated.

Purification by flash column chromatography (9:1, hexanes:EtOAc) gave the bis-TIPS-ether **6c** (97 mg, 0.14 mmol, 90%) as a pale yellow oil.

**<sup>1</sup>H NMR** (500 MHz, CDCl<sub>3</sub>): δ 7.68 (2H, d, *J* = 8.5 Hz, Ar-H), 7.32 (2H, d, *J* = 8.5 Hz, Ar-H), 4.17 (4H, s, N-CH<sub>2</sub>), 3.79 (4H, t, *J* = 7.0 Hz, CH<sub>2</sub>OTIPS), 2.48 (4H, t, *J* = 7.0 Hz, CH<sub>2</sub>CH<sub>2</sub>OTIPS), 2.42 (3H, s, Ar-CH<sub>3</sub>), 1.13-1.04 [6H, nfm, SiCH(CH<sub>3</sub>)<sub>2</sub>] and 1.05 [36H, d, *J* = 5.0 Hz, SiCH(CH<sub>3</sub>)<sub>2</sub>].

**<sup>13</sup>C NMR** (125 MHz, CDCl<sub>3</sub>): δ 144.2, 134.8, 129.8, 127.9, 77.9, 71.0, 68.2, 65.5, 61.7, 37.3, 23.8, 21.7, 18.0 and 12.0 ppm.

**IR** (neat): 2942, 2866, 2260, 1598, 1463, 1356, 1165, 1111, 1070, 1013, 996, 904, 882, 812, 745, and 685 cm<sup>-1</sup>.

**HR ESI-MS**: [C<sub>39</sub>H<sub>61</sub>NNaO<sub>4</sub>SSi<sub>2</sub>]<sup>+</sup> requires 718.3752; found 718.3745.

**TLC**: R<sub>f</sub> = 0.5 (9:1 Hex/EtOAc).



**6-Tosyl-8-(triethylsilyl)-4-{4-[(triethylsilyl)oxy]but-1-yn-1-yl}-3,5,6,7-tetrahydro-2H-furo[2,3-f]isoindole (7a)**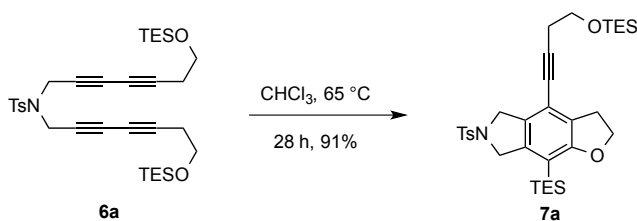

A solution of tetrayne **6a** (30 mg, 0.049 mmol) in chloroform (2 mL, 0.025 M) was placed in a screw-capped vial and heated in a  $65^\circ\text{C}$  oil bath. After 28 h the reaction mixture was concentrated. Purification of the residue by MPLC (19:1, hexanes-EtOAc) yielded the tricyclic isoindole **7a** (27 mg, 0.0442 mmol, 91%).

**$^1\text{H NMR}$**  (500 MHz,  $\text{CDCl}_3$ ):  $\delta$  7.76 (2H, d,  $J = 8.5$  Hz, ArH), 7.31 (2H, d,  $J = 8.5$  Hz, ArH), 4.55 (2H, s, N- $\text{CH}_2$ ), 4.52 (2H, s, N- $\text{CH}_2$ ), 4.47 (2H, br t,  $J = 8.5$  Hz,  $\text{CH}_2\text{OAr}$ ), 3.79 (2H, t,  $J = 7.0$  Hz,  $\text{CH}_2\text{OTES}$ ), 3.11 (2H, br t,  $J = 8.5$  Hz,  $\text{CH}_2\text{CH}_2\text{OAr}$ ), 2.67 (2H, t,  $J = 7.0$  Hz,  $\text{CH}_2\text{CH}_2\text{OTES}$ ), 2.40 (3H, s, Ar- $\text{CH}_3$ ), 0.99 [9H, t,  $J = 8.0$  Hz,  $\text{OSi}(\text{CH}_2\text{CH}_3)_3$ ], 0.87 [9H, t,  $J = 7.0$  Hz,  $\text{ArSi}(\text{CH}_2\text{CH}_3)_3$ ], 0.78 [6H, q,  $J = 8.0$  Hz,  $\text{ArSi}(\text{CH}_2\text{CH}_3)_3$ ], and 0.64 [6H, q,  $J = 8.0$  Hz,  $\text{OSi}(\text{CH}_2\text{CH}_3)_3$ ].

**$^{13}\text{C NMR}$**  (125 MHz,  $\text{CDCl}_3$ ):  $\delta$  165.9, 143.6, 141.2, 134.0, 129.9, 129.5, 128.0, 127.7, 116.3, 111.9, 95.0, 76.9, 70.9, 61.7, 55.7, 53.1, 29.2, 24.2, 21.6, 7.6, 6.9, 4.6, and 4.0 ppm.

**IR** (neat): 2954, 2876, 2260, 1597, 1459, 1388, 1346, 1237, 1163, 1097, 1056, 1004, 958, 816, 745, 671, 642, and  $611\text{cm}^{-1}$ .

**HR ESI-MS**:  $[\text{C}_{33}\text{H}_{49}\text{NNaO}_4\text{SSi}_2]^+$  requires 634.2813; found 634.2829.

**TLC**:  $R_f = 0.35$  (9:1 Hex/EtOAc).

**8-(*tert*-Butyldimethylsilyl)-4-{4-[(*tert*-butyldimethylsilyl)oxy]but-1-yn-1-yl}-6-tosyl-3,5,6,7-tetrahydro-2*H*-furo[2,3-*f*]isoindole (**7b**)**

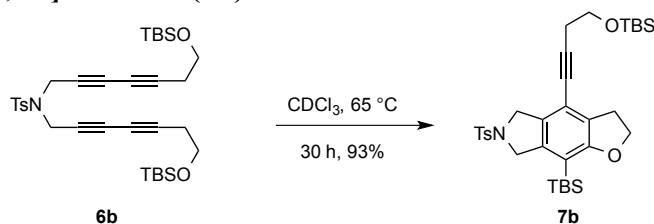

A solution of tetrayne **6b** (30 mg, 0.049 mmol) in chloroform (2 mL, 0.025 M) was kept at 65 °C. After 30 h the reaction mixture was concentrated. Purification of the residue by MPLC (19:1, hexanes-EtOAc) yielded the tricyclic isoindole **7b** (28 mg, 0.046 mmol, 93%).

**<sup>1</sup>H NMR** (500 MHz, CDCl<sub>3</sub>): δ 7.77 (2H, d, *J* = 8.0 Hz, Ar-H), 7.32 (2H, d, *J* = 8.0 Hz, Ar-H), 4.58 (2H, s, N-CH<sub>2</sub>), 4.55 (2H, s, N-CH<sub>2</sub>), 4.47 (2H, br t, *J* = 8.5 Hz, -CH<sub>2</sub>OAr), 3.82 (2H, t, *J* = 7.0 Hz, CH<sub>2</sub>OTBS), 3.13 (2H, br t, *J* = 8.5 Hz, CH<sub>2</sub>CH<sub>2</sub>OAr), 2.68 (2H, t, *J* = 7.0 Hz, CH<sub>2</sub>CH<sub>2</sub>OTBS), 2.42 (3H, s, Ar-CH<sub>3</sub>), 0.94 [9H, s, OSiC(CH<sub>3</sub>)<sub>3</sub>], 0.85 [9H, s, Ar-SiC(CH<sub>3</sub>)<sub>3</sub>], 0.29 [6H, s, ArSi<sup>i</sup>Bu(CH<sub>3</sub>)<sub>2</sub>], and 0.13 [6H, s, OSi<sup>i</sup>Bu(CH<sub>3</sub>)<sub>2</sub>].

**<sup>13</sup>C NMR** (125 MHz, CDCl<sub>3</sub>): δ 165.9, 143.6, 141.2, 133.9, 129.9, 129.4, 128.2, 127.7, 116.5, 112.2, 95.3, 76.8, 70.7, 60.0, 56.2, 53.2, 29.3, 26.7, 26.0, 24.2, 21.6, 18.6, 18.4, -3.3, and -5.1 ppm.

**IR** (neat): 2955, 2929, 2889, 2856, 2260, 1596, 1468, 1388, 1347, 1310, 1250, 1163, 1097, 1054, 960, 875, 837, 816, 783, 709, 670, 640, and 612 cm<sup>-1</sup>.

**HR ESI-MS**: [C<sub>33</sub>H<sub>49</sub>NNaO<sub>4</sub>SSi<sub>2</sub>]<sup>+</sup> requires 634.2813; found 634.2837.

**TLC**: R<sub>f</sub> = 0.35 (9:1 Hex/EtOAc).

**6-Tosyl-8-(triisopropylsilyl)-4-{4-[(triisopropylsilyl)oxy]but-1-yn-1-yl}-3,5,6,7-tetrahydro-2H-furo[2,3-f]isoindole (7c) and 5-{2-[(Diisopropyl(prop-1-en-2-yl)silyl)oxy]ethyl}-2-tosyl-4-{4-[(triisopropylsilyl)oxy]but-1-yn-1-yl}isoindoline (9)**

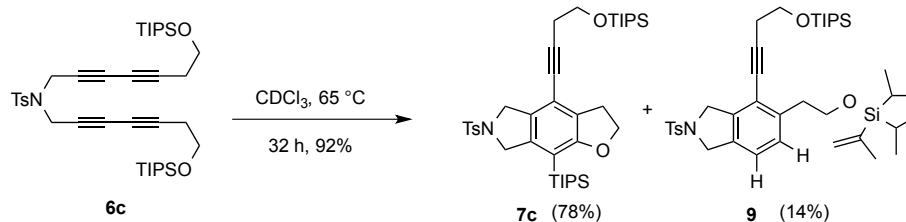

A solution of tetrayne **6c** (30 mg, 0.043 mmol) in chloroform (2 mL, 0.022 M) was kept at 65 °C. After 32 h the reaction mixture was concentrated. Purification of the residue by MPLC (19:1, hexanes-EtOAc) yielded the tricyclic isoindole **7c** (23 mg, 0.033 mmol, 78%). Further elution gave the bicyclic isoindole **9** (4 mg, 0.006 mmol, 14%).

**Data for 7c:**

**<sup>1</sup>H NMR** (500 MHz, CDCl<sub>3</sub>): δ 7.78 (2H, d, *J* = 8.0 Hz, Ar-H), 7.31 (2H, d, *J* = 8.0 Hz, Ar-H), 4.67 (2H, s, N-CH<sub>2</sub>), 4.57 (2H, s, N-CH<sub>2</sub>), 4.46 (2H, br t, *J* = 8.5 Hz, CH<sub>2</sub>OAr), 3.91 (2H, t, *J* = 7.0 Hz, CH<sub>2</sub>OTIPS), 3.14 (2H, br t, *J* = 8.5 Hz, CH<sub>2</sub>CH<sub>2</sub>OAr), 2.73 (2H, t, *J* = 7.0 Hz, CH<sub>2</sub>CH<sub>2</sub>OTIPS), 2.43 (3H, s, Ar-CH<sub>3</sub>), 1.48 [3H, septet, *J* = 7.5 Hz, ArSiCH(CH<sub>3</sub>)<sub>2</sub>], 1.22–1.10 [3H, m, OSiCH(CH<sub>3</sub>)<sub>2</sub>], 1.13 [18H, d, *J* = 5.5 Hz, OSiCH(CH<sub>3</sub>)<sub>2</sub>] and 1.05 [18H, d, *J* = 7.5 Hz, ArSiCH(CH<sub>3</sub>)<sub>2</sub>].

**<sup>13</sup>C NMR** (125 MHz, CDCl<sub>3</sub>): δ 166.2, 143.6, 141.3, 133.8, 129.9, 129.8, 128.2, 127.7, 116.4, 111.1, 95.4, 76.8, 70.5, 62.3, 56.3, 53.1, 29.3, 24.3, 21.6, 18.9, 18.2, 12.5, and 12.1 ppm.

**IR** (neat): 2943, 2865, 2260, 1595, 1463, 1385, 1350, 1302, 1166, 1100, 1058, 997, 916, 882, 816, and 740 cm<sup>-1</sup>.

**HR ESI-MS**: [C<sub>39</sub>H<sub>61</sub>NNaO<sub>4</sub>SSi<sub>2</sub>]<sup>+</sup> requires 718.3752; found 718.3782.

**TLC**: R<sub>f</sub> = 0.4 (9:1 Hex/EtOAc).

**Data for 9:**

**<sup>1</sup>H NMR** (500 MHz, CDCl<sub>3</sub>): δ 7.81 (2H, d, *J* = 8.0 Hz, O<sub>2</sub>SArH), 7.35 (2H, d, *J* = 8.0 Hz, O<sub>2</sub>SArH), 7.16 (1H, d, *J* = 8.0 Hz, ArH), 7.01 (1H, d, *J* = 8.0 Hz, Ar-H), 5.70 (1H, dq, *J* = 1.5, 3.0 Hz, =CH<sub>a</sub>H<sub>b</sub>), 5.33 (1H, dq, *J* = 1.0, 3.0 Hz, =CH<sub>a</sub>H<sub>b</sub>), 4.66 (2H, s, N-CH<sub>2</sub>), 4.63 (2H, s, N-CH<sub>2</sub>), 3.92 (2H, t, *J* = 7.0 Hz, CH<sub>2</sub>OTIPS), 3.86 (2H, t, *J* = 7.0 Hz, CH<sub>2</sub>OTIPS'), 3.02 (2H, t, *J* = 7.0 Hz, CH<sub>2</sub>CH<sub>2</sub>OTIPS), 2.73 (2H, t, *J* = 7.0 Hz, CH<sub>2</sub>CH<sub>2</sub>OTIPS'), 2.44 (3H, s, Ar-CH<sub>3</sub>), 1.81 (3H, dd, *J* = 1.5, 1.5 Hz, olefinic-CH<sub>3</sub>), 1.22–1.10 [3H, m, OSiCH(CH<sub>3</sub>)<sub>2</sub>], 1.12 [18H, d, *J* = 5.5 Hz, O'SiCH(CH<sub>3</sub>)<sub>2</sub>], 1.10–1.02 [2H, m, SiCH(CH<sub>3</sub>)<sub>2</sub>], 1.02 [6H, d, *J* = 7.0 Hz, OSiCH(CH<sub>3</sub>)<sub>2</sub>], and 1.01 [6H, d, *J* = 7.0 Hz, O'SiCH(CH<sub>3</sub>)<sub>2</sub>].

**<sup>13</sup>C NMR** (125 MHz, CDCl<sub>3</sub>): δ 143.7, 142.7, 140.4, 139.1, 134.1, 133.8, 130.0, 129.6, 128.0, 127.7, 121.4, 118.7, 95.6, 77.0, 63.8, 62.3, 54.4, 54.3, 37.8, 24.3, 23.6, 21.6, 18.2, 17.6, 17.5, 12.1, and 11.9 ppm.

**IR** (neat): 2942, 2866, 2260, 1598, 1463, 1383, 1352, 1166, 1101, 1068, 995, 920, 882, 815, and 735 cm<sup>-1</sup>.

**HR ESI-MS**: [C<sub>39</sub>H<sub>61</sub>NNaO<sub>4</sub>SSi<sub>2</sub>]<sup>+</sup> requires 718.3752; found 718.3751.

**TLC**: R<sub>f</sub> = 0.35 (9:1 Hex/EtOAc).

### Intramolecular Cross-over Experiment: Substrate Synthesis and Their Cyclization

#### *N*-{7-[(*tert*-Butyldimethylsilyloxy)hepta-2,4-diyne-1-yl]}-*N*-(7-hydroxyhepta-2,4-diyne-1-yl)-4-methylbenzenesulfonamide (**S1**)

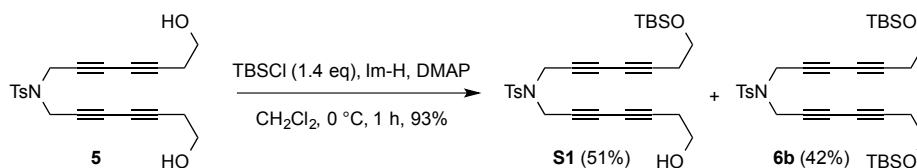

TBSCl (77 mg, 0.512 mmol) was added to a solution of imidazole (50 mg, 0.732 mmol), DMAP (5 mg, 0.037 mmol), and diol **5** (140 mg, 0.366 mmol) in DCM (3 mL) at 0 °C with stirring.

After 1 h the reaction mixture was diluted with water (10 mL) and extracted with CH<sub>2</sub>Cl<sub>2</sub> (2 x 20 mL). The combined organic extracts were washed with brine, dried (MgSO<sub>4</sub>), and concentrated.

Purification by flash column chromatography (9:1, hexanes:EtOAc) gave the bis-TBS-ether **6b** (94 mg, 0.154 mmol, 42%) as a pale yellow oil. Further elution with (1:1, hexanes:EtOAc) afforded the mono-hydroxy, mono-TBS-ether **S1** (93 mg, 0.187 mmol, 51%).

#### Data for **S1**

<sup>1</sup>H NMR (500 MHz, CDCl<sub>3</sub>): δ 7.68 (2H, d, *J* = 8.5 Hz, Ar-H), 7.32 (2H, d, *J* = 8.5 Hz, Ar-H), 4.18 (2H, s, N-CH<sub>2</sub>), 4.17 (2H, s, N-CH<sub>2</sub>), 3.73 (2H, t, *J* = 6.0 Hz, CH<sub>2</sub>OH), 3.71 (2H, t, *J* = 6.0 Hz, CH<sub>2</sub>OTBS), 2.52 (2H, t, *J* = 6.0 Hz, CH<sub>2</sub>CH<sub>2</sub>OH), 2.45 (2H, t, *J* = 6.0 Hz, CH<sub>2</sub>CH<sub>2</sub>OTBS), 2.43 (3H, s, Ar-CH<sub>3</sub>), 1.84 (1H, br s, OH), 0.89 [9H, s, SiC(CH<sub>3</sub>)<sub>3</sub>], and 0.06 [6H, s, Si(CH<sub>3</sub>)<sub>2</sub>].

<sup>13</sup>C NMR (125 MHz, CDCl<sub>3</sub>): δ 144.3, 134.8, 129.8, 127.9, 78.0, 77.4, 71.1, 70.7, 68.8, 68.3, 66.1, 65.4, 61.4, 60.7, 37.4, 37.3, 26.0, 23.73, 23.70, 21.7, 18.4 and -5.2 ppm.

IR (neat): 2956, 2928, 2856, 2259, 1598, 1469, 1353, 1254, 1163, 1095, 1055, 902, 839, 815, 780, 747, and 677 cm<sup>-1</sup>.

HR ESI-MS: [C<sub>27</sub>H<sub>35</sub>NNaO<sub>4</sub>SSi]<sup>+</sup> requires 520.1948; found 520.1958.

TLC: R<sub>f</sub> = 0.5 (1:1 Hex/EtOAc).

***N*-{7-[(*tert*-Butyldimethylsilyl)oxy]hepta-2,4-diyn-1-yl}-4-methyl-*N*-{7-[(triisopropylsilyl)oxy]hepta-2,4-diyn-1-yl}benzenesulfonamide (**6d**)**

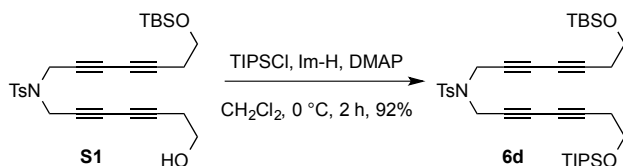

TIPSCl (27 mg, 0.14 mmol) was added to a solution of imidazole (14 mg, 0.2 mmol), DMAP (1 mg, 0.01 mmol), and mono-alcohol **S1** (50 mg, 0.1 mmol) in DCM (3 mL) at 0 °C with stirring. After 2 h the reaction mixture was diluted with water (10 mL) and extracted with CH<sub>2</sub>Cl<sub>2</sub> (2 x 20 mL). The combined organic extracts were washed with brine, dried (MgSO<sub>4</sub>), and concentrated. Purification by flash column chromatography (9:1, hexanes:EtOAc) gave the mono-TBS, mono-TIPS-ether **6d** (61 mg, 0.093 mmol, 92%) as a pale yellow oil.

**<sup>1</sup>H NMR** (500 MHz, CDCl<sub>3</sub>): δ 7.69 (2H, d, *J* = 8.5 Hz, Ar-H), 7.32 (2H, d, *J* = 8.5 Hz, Ar-H), 4.17 (4H, s, two N-CH<sub>2</sub>), 3.79 (2H, t, *J* = 7.0 Hz, CH<sub>2</sub>OTIPS), 3.71 (2H, t, *J* = 7.0 Hz, CH<sub>2</sub>OTBS), 2.49 (2H, t, *J* = 7.0 Hz, CH<sub>2</sub>CH<sub>2</sub>OTIPS), 2.45 (2H, t, *J* = 7.0 Hz, CH<sub>2</sub>CH<sub>2</sub>OTBS), 2.43 (3H, s, Ar-CH<sub>3</sub>), 1.14-1.00 [3H, m, SiCH(CH<sub>3</sub>)<sub>2</sub>], 1.06 [18H, d, *J* = 5.0 Hz, Si(CH(CH<sub>3</sub>)<sub>2</sub>)], 0.90 [9H, s, Si(CH<sub>3</sub>)<sub>3</sub>], and 0.07 [6H, s, Si(CH<sub>3</sub>)<sub>2</sub>].

**<sup>13</sup>C NMR** (125 MHz, CDCl<sub>3</sub>): δ 144.3, 134.9, 129.8, 128.0, 78.0, 77.4, 71.01, 70.98, 68.34, 68.3, 65.4 (2C), 61.6, 61.2, 37.3 (2C), 26.0, 23.83, 23.76, 21.7, 18.4, 18.1, 12.1, and -5.2 ppm.

**IR** (neat): 2955, 2915, 2878, 2258, 1459, 1415, 1356, 1258, 1165, 1104, 1016, 905, 837, 763, 751, and 668 cm<sup>-1</sup>.

**HR ESI-MS**: [C<sub>36</sub>H<sub>55</sub>NNaO<sub>4</sub>SSi<sub>2</sub>]<sup>+</sup> requires 676.3283; found 676.3315.

**TLC**: R<sub>f</sub> = 0.4 (9:1 Hex/EtOAc).

**8-(*tert*-Butyldimethylsilyl)-6-tosyl-4-{4-[(triisopropylsilyl)oxy]but-1-yn-1-yl}-3,5,6,7-tetrahydro-2*H*-furo[2,3-*f*]isoindole (7d) and**

**4-{4-[(*tert*-Butyldimethylsilyl)oxy]but-1-yn-1-yl}-6-tosyl-8-(triisopropylsilyl)-3,5,6,7-tetrahydro-2*H*-furo[2,3-*f*]isoindole (7d')**

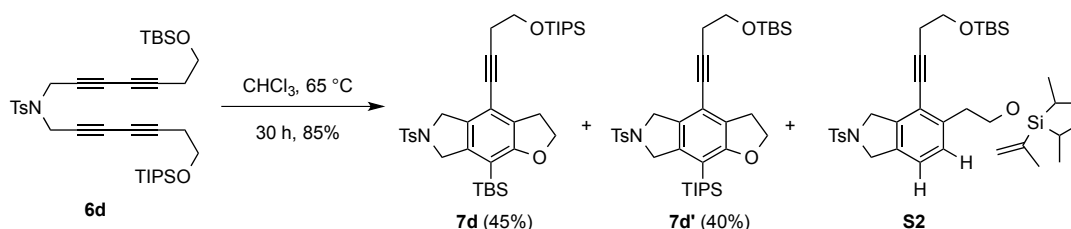

A solution of tetrayne **6d** (40 mg, 0.061 mmol) in chloroform (3 mL, 0.02 M) was kept at  $65^\circ\text{C}$ . After 32 h the reaction mixture was concentrated. Purification of the residue by MPLC (25:1, hexanes:EtOAc) first gave the tricyclic isoindole **7d** (18 mg, 0.027 mmol, 45%) followed closely by the isomeric **7d'** (16 mg, 0.024 mmol, 40%). A trace of what was judged to be **S2**, the disproportionation dihydrogen-transfer product analogous to **9** (see above), was detected in the  $^1\text{H}$  NMR spectrum of the crude product mixture, but it was not isolated.

**Data for 7d**

$^1\text{H}$  NMR (500 MHz,  $\text{CDCl}_3$ ):  $\delta$  7.74 (2H, d,  $J = 8.0$  Hz, Ar-H), 7.30 (2H, d,  $J = 8.0$  Hz, Ar-H), 4.56 (2H, s, N- $\text{CH}_2$ ), 4.53 (2H, s, N- $\text{CH}_2$ ), 4.45 (2H, br t,  $J = 9.0$  Hz,  $\text{CH}_2\text{OAr}$ ), 3.87 (2H, t,  $J = 7.0$  Hz,  $\text{CH}_2\text{OTIPS}$ ), 3.10 (2H, br t,  $J = 9.0$  Hz,  $\text{CH}_2\text{CH}_2\text{OAr}$ ), 2.69 (2H, t,  $J = 7.0$  Hz,  $\text{CH}_2\text{CH}_2\text{OTIPS}$ ), 2.40 (3H, s, Ar- $\text{CH}_3$ ), 1.18-1.08 [3H, m,  $\text{Si}(\text{CH}(\text{CH}_3)_2)_3$ ], 1.08 [18H, d,  $J = 6.0$  Hz,  $\text{Si}(\text{CH}(\text{CH}_3)_2)_3$ ], 0.82 [9H, s,  $\text{Si}(\text{CH}_3)_3$ ], and 0.27 [6H, s,  $\text{Si}(\text{CH}_3)_2$ ].

$^{13}\text{C}$  NMR (125 MHz,  $\text{CDCl}_3$ ):  $\delta$  165.9, 143.6, 141.2, 133.9, 129.9, 129.4, 128.2, 127.7, 116.5, 112.2, 95.4, 76.8, 70.7, 62.3, 56.2, 53.2, 29.2, 26.7, 24.3, 21.6, 18.6, 18.2, 12.1, and  $-3.3$  ppm.

IR (neat): 2954, 2865, 1596, 1463, 1388, 1349, 1308, 1249, 1166, 1098, 1056, 997, 881, 836, 813, and  $782\text{ cm}^{-1}$ .

HR ESI-MS:  $[\text{C}_{36}\text{H}_{55}\text{NNaO}_4\text{SSi}_2]^+$  requires 676.3283; found 676.3291.

TLC:  $R_f = 0.37$  (9:1 Hex/EtOAc).

**Data for 7d'**

**<sup>1</sup>H NMR** (500 MHz, CDCl<sub>3</sub>): δ 7.75 (2H, d, *J* = 8.0 Hz, Ar-H), 7.29 (2H, d, *J* = 8.0 Hz, Ar-H), 4.65 (2H, s, N-CH<sub>2</sub>), 4.53 (2H, s, N-CH<sub>2</sub>), 4.43 (2H, br t, *J* = 9.0 Hz, CH<sub>2</sub>OAr), 3.80 (2H, t, *J* = 7.0 Hz, CH<sub>2</sub>OTBS), 3.11 (2H, br t, *J* = 9.0 Hz, CH<sub>2</sub>CH<sub>2</sub>OAr), 2.52 (2H, t, *J* = 7.0 Hz, CH<sub>2</sub>CH<sub>2</sub>OTBS), 2.40 (3H, s, Ar-CH<sub>3</sub>), 1.45 [3H, septet, *J* = 8.0 Hz, Si(CH(CH<sub>3</sub>)<sub>2</sub>)], 1.01 [18H, d, *J* = 8.0 Hz, Si(CH(CH<sub>3</sub>)<sub>2</sub>)], 0.92 [9H, s, SiC(CH<sub>3</sub>)<sub>3</sub>], and 0.11 [6H, s, Si(CH<sub>3</sub>)<sub>2</sub>].

**<sup>13</sup>C NMR** (125 MHz, CDCl<sub>3</sub>): δ 166.2, 143.7, 141.4, 133.8, 129.9, 129.8, 128.2, 127.7, 116.3, 111.2, 95.3, 77.4, 70.5, 62.0, 56.3, 53.2, 29.3, 26.0, 24.2, 21.6, 18.9, 18.5, 12.5 and -5.1 ppm.

**IR** (neat): 2954, 2931, 2863, 1595, 1463, 1385, 1349, 1304, 1252, 1166, 1098, 1055, 997, 882, 836, and 778 cm<sup>-1</sup>.

**HR ESI-MS**: [C<sub>36</sub>H<sub>55</sub>NNaO<sub>4</sub>SSi<sub>2</sub>]<sup>+</sup> requires 676.3283; found 676.3304.

**TLC**: R<sub>f</sub> = 0.35 (9:1 Hex/EtOAc).



**Intermolecular Cross-over Experiment:**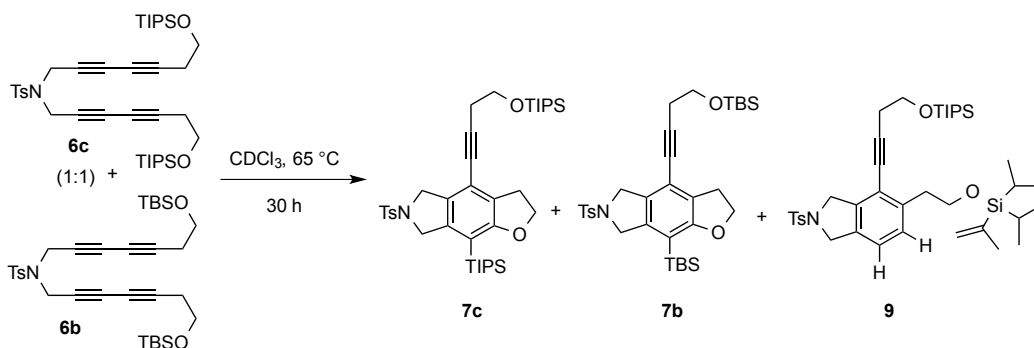

A nearly equimolar solution of tetraynes **6b** (12 mg, 0.02 mmol) and **6c** (14 mg, 0.02 mmol) in chloroform-*d* (1 mL) was kept at  $65\text{ }^\circ\text{C}$ . Reaction progress was followed by  $^1\text{H-NMR}$  and LCMS. After 32 h only products **7b** and **7c** were observed; there was no evidence for the presence of cross-over products **7d** and **7d'**, whose presence would have been detected by both  $^1\text{H-NMR}$  and LCMS analysis.



**4-{4-[(*tert*-Butyldimethylsilyl)oxy]but-1-yn-1-yl}-5-{2-[(*tert*-butyldimethylsilyl)oxy]ethyl}-2-tosylisoindoline (**10b**)**

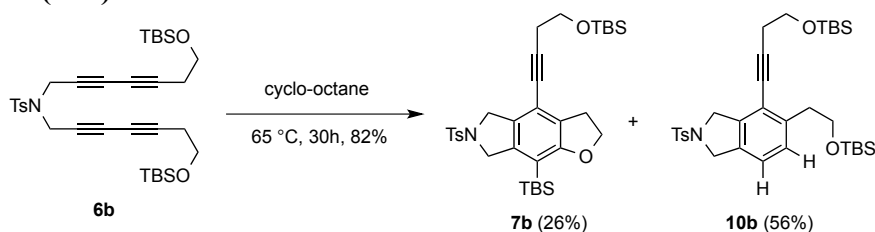

**[BB-4-119]** A solution of tetrayne **6b** (50 mg, 0.082 mmol) in cyclooctane (4 mL, 0.02 M) was kept at 65 °C. After 30 h solvent was removed by eluting the reaction mixture with hexanes through a small silica gel column. The column was then eluted with ethyl acetate to collect the products. Concentration of that polar eluent and purification of the resulting residue by MPLC using (25:1, hexanes:EtOAc) first gave the tricyclic isoindole **7b** (13 mg, 0.021 mmol, 26%) followed by the bicyclic, reduced isoindole **10b** (28 mg, 0.046 mmol, 56%).

**Data for 10b**

**<sup>1</sup>H NMR** (500 MHz, CDCl<sub>3</sub>): δ 7.77 (2H, d, *J* = 8.0 Hz, Ar-H), 7.31 (2H, d, *J* = 8.0 Hz, Ar-H), 7.09 (1H, d, *J* = 7.8 Hz, Ar-H), 6.97 (1H, d, *J* = 7.8 Hz, Ar-H), 4.62 (2H, s, N-CH<sub>2</sub>), 4.60 (2H, s, N-CH<sub>2</sub>), 3.81 (2H, t, *J* = 7.0 Hz, Ar-CH<sub>2</sub>CH<sub>2</sub>OTBS), 3.74 (2H, t, *J* = 7.0 Hz, CH<sub>2</sub>OTBS), 2.93 (2H, t, *J* = 7.0 Hz, Ar-CH<sub>2</sub>CH<sub>2</sub>OTBS), 2.67 (2H, t, *J* = 7.0 Hz, CH<sub>2</sub>CH<sub>2</sub>OTBS), 2.40 (3H, s, Ar-CH<sub>3</sub>), 0.92 [9H, s, Ar-CH<sub>2</sub>CH<sub>2</sub>OSi(CH<sub>3</sub>)<sub>3</sub>], 0.85 [9H, s, CH<sub>2</sub>CH<sub>2</sub>OSi(CH<sub>3</sub>)<sub>3</sub>], 0.10 [6H, s, Si(CH<sub>3</sub>)<sub>2</sub>], and -0.03 [6H, s, Si(CH<sub>3</sub>)<sub>2</sub>].

**<sup>13</sup>C NMR** (125 MHz, CDCl<sub>3</sub>): δ 143.7, 140.4, 139.1, 134.0, 133.9, 130.0, 129.6, 127.7, 121.4, 118.7, 95.6, 77.0, 63.4, 62.0, 54.3, 54.2, 37.8, 26.0 (2C), 24.2, 21.6, 18.46, 18.44, -5.1, and -5.3 ppm.

**IR** (neat): 2953, 2928, 2857, 1598, 1471, 1351, 1254, 1166, 1098, 1068, 915, 837, 814, and 778 cm<sup>-1</sup>.

**HR ESI-MS**: [C<sub>33</sub>H<sub>51</sub>NNaO<sub>4</sub>SSi<sub>2</sub>]<sup>+</sup> requires 636.2970; found 636.2979.

**TLC**: R<sub>f</sub> = 0.30 (9:1 Hex/EtOAc).

**2-Tosyl-4-{4-[(triisopropylsilyloxy)but-1-yn-1-yl]-5-{-(triisopropylsilyloxy)ethyl}-isoindoline (10c)**

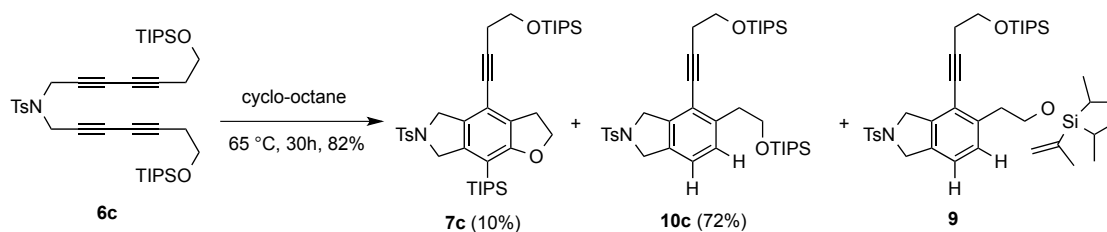

A solution of tetrayne **6c** (57 mg, 0.082 mmol) in cyclooctane (4 mL, 0.02 M) was kept at 65 °C. After 30 h the cyclooctane solvent was removed by eluting the reaction mixture with hexanes through a small silica gel column. The column was then eluted with ethyl acetate to collect the products. Concentration of that polar eluent and purification of the resulting residue by MPLC (25:1, hexanes:EtOAc) first gave the tricyclic isoindole **7c** (6 mg, 0.009 mmol, 10%) followed by the bicyclic isoindole **10c** (41 mg, 0.06 mmol, 72%).

**Data for 10c**

**<sup>1</sup>H NMR** (500 MHz, CDCl<sub>3</sub>): δ 7.77 (2H, d, *J* = 8.0 Hz, Ar-H), 7.31 (2H, d, *J* = 8.0 Hz, Ar-H), 7.12 (1H, d, *J* = 7.8 Hz, Ar-H), 6.97 (1H, d, *J* = 7.8 Hz, Ar-H), 4.62 (2H, s, N-CH<sub>2</sub>), 4.60 (2H, s, N-CH<sub>2</sub>), 3.88 (2H, t, *J* = 7.0 Hz, ArCH<sub>2</sub>CH<sub>2</sub>OTIPS), 3.81 (2H, t, *J* = 7.0 Hz, CH<sub>2</sub>CH<sub>2</sub>OTIPS), 2.96 (2H, t, *J* = 7.0 Hz, Ar-CH<sub>2</sub>CH<sub>2</sub>OTIPS), 2.69 (2H, t, *J* = 7.0 Hz, CH<sub>2</sub>CH<sub>2</sub>OTIPS), 2.40 (3H, s, Ar-CH<sub>3</sub>), 1.18-0.94 [6H, m, Si(CH(CH<sub>3</sub>)<sub>2</sub>)<sub>3</sub>], 1.08 [18H, d, *J* = 6.0 Hz, Si(CH(CH<sub>3</sub>)<sub>2</sub>)<sub>3</sub>], and 1.00 [18H, d, *J* = 6.0 Hz, Si(CH(CH<sub>3</sub>)<sub>2</sub>)<sub>3</sub>].

**<sup>13</sup>C NMR** (125 MHz, CDCl<sub>3</sub>): δ 143.7, 140.5, 139.0, 134.0, 133.8, 129.9, 129.6, 127.7, 121.4, 118.7, 95.6, 77.0, 63.7, 62.3, 54.35, 54.28, 37.9, 24.3, 21.6, 18.14, 18.10, 12.12, and 12.10 ppm.

**IR** (neat): 2942, 2913, 2866, 1598, 1464, 1383, 1352, 1247, 1166, 1100, 1069, 1015, 996, 919, and 814 cm<sup>-1</sup>.

**HR ESI-MS**: [C<sub>39</sub>H<sub>63</sub>NNaO<sub>4</sub>SSi<sub>2</sub>]<sup>+</sup> requires 720.3909; found 720.3876.

**TLC**: R<sub>f</sub> = 0.35 (9:1 Hex/EtOAc).

***N*-{7-[(*tert*-Butyldimethylsilyloxy)hepta-2,4-diyne-1-yl]}-*N*-{8-[(*tert*-butyldimethylsilyloxy)octa-2,4-diyne-1-yl]}-4-methylbenzenesulfonamide (**12**)**

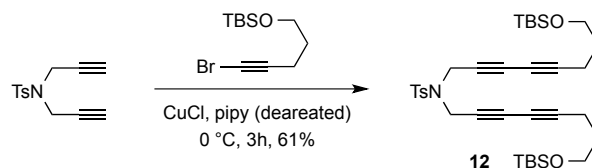

CuCl (10 mg, 0.1 mmol) was added to a solution of 4-methyl-*N,N*-di(prop-2-yn-1-yl)benzenesulfonamide<sup>2</sup> (125 mg, 0.51 mmol) and 1-(*tert*-butyldimethylsilyloxy)-5-bromo-4-pentyne<sup>4</sup> (307 mg, 1.1 mmol) in freshly deaerated piperidine (1 mL, 0.5 M) at 0 °C. After 3 h the reaction mixture was partitioned between EtOAc (20 mL) and saturated aqueous NH<sub>4</sub>Cl (20 mL). The aqueous phase was extracted twice with EtOAc (2 x 15 mL), and the combined organic extracts were washed with brine (10 mL), dried over MgSO<sub>4</sub>, and concentrated. Purification by flash column chromatography (9:1, hexanes:EtOAc) gave the tetrayne **12** (197 mg, 0.31 mmol, 61%).

**<sup>1</sup>H NMR** (500 MHz, CDCl<sub>3</sub>): δ 7.69 (2H, d, *J* = 8.5 Hz, Ar-H), 7.32 (2H, d, *J* = 8.5 Hz, Ar-H), 4.18 (4H, s, N-CH<sub>2</sub>), 3.66 (4H, t, *J* = 7.0 Hz, CH<sub>2</sub>OTBS), 2.42 (3H, s, Ar-CH<sub>3</sub>), 2.34 (4H, t, *J* = 7.0 Hz, Ar-CH<sub>2</sub>), 1.70 (4H, tt, *J* = 7.0, 7.0 Hz, CH<sub>2</sub>CH<sub>2</sub>CH<sub>2</sub>OTBS), 0.89 [18H, s, SiC(CH<sub>3</sub>)<sub>3</sub>], and 0.05 [12H, s, Si<sup>*t*</sup>Bu(CH<sub>3</sub>)<sub>2</sub>].

**<sup>13</sup>C NMR** (125 MHz, CDCl<sub>3</sub>): δ 144.1, 134.8, 129.7, 127.8, 80.5, 71.0, 67.9, 64.4, 61.3, 37.2, 31.2, 25.9, 21.6, 18.3, 15.3 and -5.3 ppm.

**IR** (neat): 2954, 2930, 2857, 2257, 1598, 1471, 1358, 1252, 1165, 1103, 1007, 905, 893, 836, 814, and 778 cm<sup>-1</sup>.

**HR ESI-MS**: [C<sub>35</sub>H<sub>53</sub>NNaO<sub>4</sub>SSi<sub>2</sub>]<sup>+</sup> requires 662.3126; found 662.3157.

**TLC**: R<sub>f</sub> = 0.4 (9:1 Hex/EtOAc).

**9-(*tert*-Butyldimethylsilyl)-5-{5-[(*tert*-butyldimethylsilyl)oxy]pent-1-yn-1-yl}-7-tosyl-2,3,4,6,7,8-hexahydropyrano[2,3-*f*]isoindole (13)**

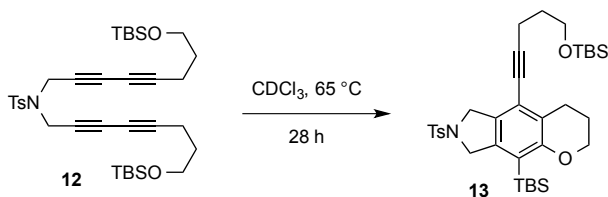

A solution of tetrayne **12** (7 mg, 0.011 mmol) in chloroform-*d* (0.6 mL, 0.018 M) was kept at  $65^\circ\text{C}$  for 28 h. Reaction was monitored by  $^1\text{H-NMR}$  spectral analysis. Once the approximate reaction rate was known, the following experiment was performed on a scale suitable for isolation and characterization of product **13**.

**9-(*tert*-Butyldimethylsilyl)-5-{5-[(*tert*-butyldimethylsilyl)oxy]pent-1-yn-1-yl}-7-tosyl-2,3,4,6,7,8-hexahydropyrano[2,3-*f*]isoindole (**13**) and 4-{4-[(*tert*-Butyldimethylsilyl)oxy]but-1-yn-1-yl}-5-{2-[(*tert*-butyldimethylsilyl)oxy]ethyl}-2-tosylisoindoline (**14**)**

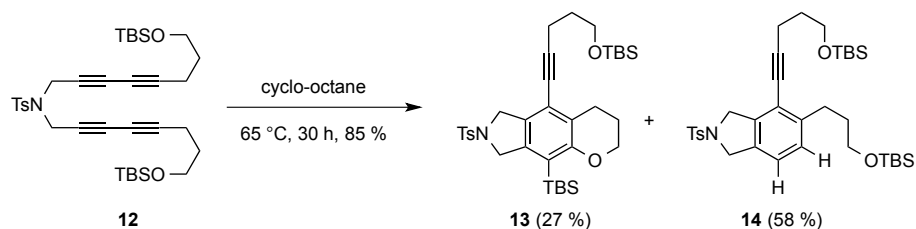

A solution of tetrayne **12** (52 mg, 0.082 mmol) in cyclooctane (4 mL, 0.02 M) was kept at 65 °C. After 30 h the cyclooctane solvent was removed by eluting the reaction mixture with hexanes through a small silica gel column. The column was then eluted with ethyl acetate to collect the products. Concentration of that polar eluent and purification of the resulting residue by MPLC (25:1, hexanes:EtOAc) gave the tricyclic isoindole **13** (14 mg, 0.022 mmol, 27%) followed by the reduced bicyclic compound **14** (30 mg, 0.047 mmol, 58%).

#### Data for **13**

**<sup>1</sup>H NMR** (500 MHz, CDCl<sub>3</sub>): δ 7.74 (2H, d, *J* = 8.2 Hz, Ar-H), 7.29 (2H, d, *J* = 8.0 Hz, Ar-H), 4.58 (2H, br s, N-CH<sub>2</sub>), 4.53 (2H, br s, N-CH<sub>2</sub>), 4.00 (2H, br t, *J* = 5.2 Hz, CH<sub>2</sub>OAr), 3.74 (2H, 7, *J* = 6.8 Hz, CH<sub>2</sub>OTBS), 2.77 (2H, br t, *J* = 6.6 Hz, ArCH<sub>2</sub>CH<sub>2</sub>CH<sub>2</sub>OAr), 2.55 (2H, t, *J* = 7.0 Hz, ≡CH<sub>2</sub>CH<sub>2</sub>CH<sub>2</sub>OTBS), 2.40 (3H, s, Ar-CH<sub>3</sub>), 1.91 (2H, br tt, Σ*J*s = 23.7 Hz, ArCH<sub>2</sub>CH<sub>2</sub>CH<sub>2</sub>OAr), 1.80 (2H, tt, *J* = 7.0, 7.0 Hz, CH<sub>2</sub>CH<sub>2</sub>OTBS), 0.92 [9H, s, OSi(CH<sub>3</sub>)<sub>3</sub>], 0.83 [9H, s, Ar-Si(CH<sub>3</sub>)<sub>3</sub>], 0.24 [6H, s, Ar-Si<sup>*i*</sup>Bu(CH<sub>3</sub>)<sub>2</sub>], and 0.08 [6H, s, OSi<sup>*i*</sup>Bu(CH<sub>3</sub>)<sub>2</sub>].

**<sup>13</sup>C NMR** (125 MHz, CDCl<sub>3</sub>): δ 160.0, 143.6, 140.4, 133.9, 130.1, 129.9, 127.7, 122.4, 120.4, 119.6, 100.2, 76.1, 65.5, 61.7, 56.4, 53.4, 32.2, 27.1, 26.1, 24.2, 22.0, 21.6, 18.7, 18.5, 16.3, -2.1, and -5.1 ppm.

**IR** (neat): 2952, 2928, 2856, 2260, 1587, 1561, 1471, 1400, 1348, 1290, 1256, 1166, 1099, 1069, 975, 838, 814 and 778 cm<sup>-1</sup>.

**HR ESI-MS**: [C<sub>35</sub>H<sub>53</sub>NNaO<sub>4</sub>SSi<sub>2</sub>]<sup>+</sup> requires 662.3126; found 662.3137.

**TLC**: R<sub>f</sub> = 0.35 (9:1 Hex/EtOAc).

**Data for 14**

**<sup>1</sup>H NMR** (500 MHz, CDCl<sub>3</sub>): δ 7.78 (2H, d, *J* = 8.0 Hz, Ar-H), 7.32 (2H, d, *J* = 8.0 Hz, Ar-H), 7.06 (1H, d, *J* = 8.0 Hz, Ar-H), 6.97 (1H, d, *J* = 8.0 Hz, Ar-H), 4.63 (2H, s, N-CH<sub>2</sub>), 4.60 (2H, s, N-CH<sub>2</sub>), 3.74 (2H, t, *J* = 7.0 Hz, CH<sub>2</sub>OTBS), 3.61 (2H, t, *J* = 7.0 Hz, CH<sub>2</sub>OTBS), 2.76 (2H, t, *J* = 7.0 Hz, CH<sub>2</sub>CH<sub>2</sub>CH<sub>2</sub>OTBS), 2.54 (2H, t, *J* = 7.0 Hz, CH<sub>2</sub>CH<sub>2</sub>CH<sub>2</sub>OTBS), 2.41 (3H, s, Ar-CH<sub>3</sub>), 2.76 (2H, tt, *J* = 7.0, 7.0 Hz, CH<sub>2</sub>CH<sub>2</sub>CH<sub>2</sub>OTBS), 2.54 (2H, tt, *J* = 7.0, 7.0 Hz, CH<sub>2</sub>CH<sub>2</sub>CH<sub>2</sub>OTBS), 0.92 [9H, s, OSiC(CH<sub>3</sub>)<sub>3</sub>], 0.89 [9H, s, OSiC(CH<sub>3</sub>)<sub>3</sub>], 0.09 [6H, s, Si(CH<sub>3</sub>)<sub>2</sub>], and 0.04 [6H, s, Si(CH<sub>3</sub>)<sub>2</sub>].

**<sup>13</sup>C NMR** (125 MHz, CDCl<sub>3</sub>): δ 143.71, 143.70, 139.0, 134.0, 133.4, 130.0, 128.5, 127.7, 121.4, 118.6, 98.7, 76.1, 62.7, 61.8, 54.34, 54.32, 33.7, 32.2, 30.6, 26.12, 26.10, 21.7, 18.5, 18.4, 16.3, and -5.1 (2C) ppm.

**IR** (neat): 2952, 2928, 2857, 1598, 1471, 1350, 1254, 1164, 1100, 1067, 965, 836, 814, and 777 cm<sup>-1</sup>.

**HR ESI-MS**: [C<sub>35</sub>H<sub>55</sub>NNaO<sub>4</sub>SSi<sub>2</sub>]<sup>+</sup> requires 664.3283; found 664.3284.

**TLC**: R<sub>f</sub> = 0.30 (9:1 Hex/EtOAc).



## Computational Methodology

DFT calculations were performed with the Gaussian 09<sup>5</sup> software package. All geometries were optimized using the M06-2X functional.<sup>6</sup> The following basis sets were used: double- $\zeta$  split-valence 6-31G(d), triple- $\zeta$  split-valence 6-311G(d,p), and Dunning's correlation consistent, triple- $\zeta$  cc-pVTZ. Acetonitrile solvation was approximated by the continuum solvation model SMD<sup>7</sup> for both the geometry optimizations and the frequency calculations ["scrf=(SMD,solvent=acetonitrile)" keyword]. All calculations used the grid=ultrafine option to specify the integration grid used during the numerical integrations ["integral(grid=ultrafine)" keyword]. Harmonic vibrational frequency calculations were performed at 298 K to provide thermal corrections to the enthalpies. The optimized geometry for each reactant, intermediate, and product was found to have no imaginary frequencies; the optimized geometry for each transition structure (TS) was found to have one (and only one) imaginary frequency. Analysis of the imaginary frequency (by following the normal modes associated with each) for each TS identified it with each associated starting material and product.

**Computed energy and geometry of 8-TS**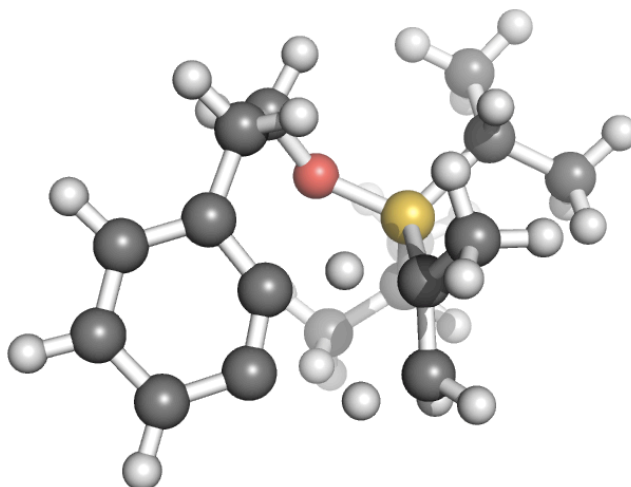**M06-2X/6-31G(d)**

Sum of electronic and thermal Enthalpies = -1028.473631 A.U.<sup>a</sup>

Imaginary frequency: -521.7727 cm<sup>-1</sup>

| Center<br>Number | Atomic<br>Number | Atomic<br>Type | Coordinates (Angstroms) |           |           |
|------------------|------------------|----------------|-------------------------|-----------|-----------|
|                  |                  |                | X                       | Y         | Z         |
| 1                | 6                | 0              | -4.471445               | -0.005686 | -0.575680 |
| 2                | 6                | 0              | -3.694844               | 1.162290  | -0.484598 |
| 3                | 6                | 0              | -2.420866               | 1.135728  | 0.090853  |
| 4                | 6                | 0              | -2.079500               | -0.135832 | 0.526247  |
| 5                | 6                | 0              | -2.732047               | -1.251903 | 0.447673  |
| 6                | 6                | 0              | -4.014156               | -1.244358 | -0.109947 |
| 7                | 1                | 0              | -5.456352               | 0.058895  | -1.032172 |
| 8                | 1                | 0              | -4.091694               | 2.100571  | -0.866089 |
| 9                | 1                | 0              | -4.638942               | -2.128773 | -0.202899 |
| 10               | 6                | 0              | -0.191508               | -2.230342 | 1.392697  |
| 11               | 1                | 0              | -1.333631               | -2.237724 | 1.079421  |
| 12               | 1                | 0              | -0.158501               | -2.704948 | 2.377515  |
| 13               | 1                | 0              | 0.298451                | -2.860457 | 0.648096  |
| 14               | 6                | 0              | 0.217274                | -0.819599 | 1.407404  |
| 15               | 1                | 0              | -0.886366               | -0.246655 | 0.991954  |
| 16               | 14               | 0              | 1.237056                | -0.065410 | -0.022485 |
| 17               | 8                | 0              | 0.312247                | 0.995567  | -0.910011 |
| 18               | 6                | 0              | -1.467651               | 2.290329  | 0.229433  |
| 19               | 1                | 0              | -1.985493               | 3.248232  | 0.103757  |
| 20               | 1                | 0              | -1.052187               | 2.283392  | 1.246025  |

|    |   |   |           |           |           |
|----|---|---|-----------|-----------|-----------|
| 21 | 6 | 0 | -0.309639 | 2.248825  | -0.782574 |
| 22 | 1 | 0 | -0.698779 | 2.498669  | -1.775764 |
| 23 | 1 | 0 | 0.425210  | 3.018772  | -0.507270 |
| 24 | 6 | 0 | 0.330941  | -0.190321 | 2.789845  |
| 25 | 1 | 0 | -0.491783 | -0.521178 | 3.433671  |
| 26 | 1 | 0 | 1.270400  | -0.489631 | 3.270930  |
| 27 | 1 | 0 | 0.313781  | 0.904275  | 2.756417  |
| 28 | 6 | 0 | 2.737031  | 0.800725  | 0.736243  |
| 29 | 1 | 0 | 2.358380  | 1.373991  | 1.596400  |
| 30 | 6 | 0 | 1.635435  | -1.409267 | -1.282248 |
| 31 | 1 | 0 | 2.017004  | -2.280428 | -0.729046 |
| 32 | 6 | 0 | 3.732550  | -0.239413 | 1.270640  |
| 33 | 1 | 0 | 4.555302  | 0.241662  | 1.812449  |
| 34 | 1 | 0 | 3.258176  | -0.955186 | 1.952595  |
| 35 | 1 | 0 | 4.175215  | -0.814905 | 0.449109  |
| 36 | 6 | 0 | 3.424087  | 1.790615  | -0.212903 |
| 37 | 1 | 0 | 2.722703  | 2.532817  | -0.606846 |
| 38 | 1 | 0 | 4.230218  | 2.327465  | 0.301815  |
| 39 | 1 | 0 | 3.869781  | 1.277286  | -1.070457 |
| 40 | 6 | 0 | 2.703622  | -0.978485 | -2.296019 |
| 41 | 1 | 0 | 3.682748  | -0.827200 | -1.830442 |
| 42 | 1 | 0 | 2.824262  | -1.740798 | -3.075494 |
| 43 | 1 | 0 | 2.416975  | -0.043903 | -2.792422 |
| 44 | 6 | 0 | 0.349676  | -1.812836 | -2.024165 |
| 45 | 1 | 0 | 0.539108  | -2.667236 | -2.684928 |
| 46 | 1 | 0 | -0.472029 | -2.080153 | -1.350229 |
| 47 | 1 | 0 | -0.002480 | -0.978481 | -2.638634 |

---

<sup>a</sup> Atomic Units = Hartrees

## Computed energy and geometry of I

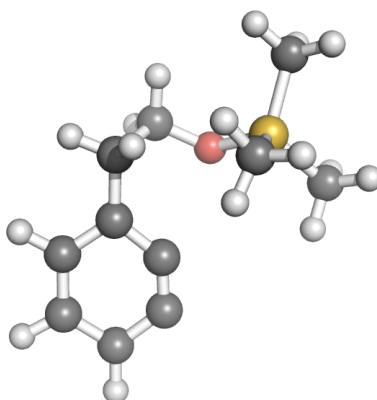

### M06-2X/6-311G(d,p)

Sum of electronic and thermal Enthalpies = -793.117704 A.U.<sup>a</sup>

| Center Number | Atomic Number | Atomic Type | Coordinates (Angstroms) |           |           |
|---------------|---------------|-------------|-------------------------|-----------|-----------|
|               |               |             | X                       | Y         | Z         |
| 1             | 6             | 0           | 3.111267                | -0.998053 | 0.121095  |
| 2             | 6             | 0           | 4.126298                | -0.034227 | -0.012413 |
| 3             | 6             | 0           | 3.859705                | 1.339338  | -0.123289 |
| 4             | 6             | 0           | 2.488893                | 1.582846  | -0.093020 |
| 5             | 6             | 0           | 1.632208                | 0.694844  | 0.031945  |
| 6             | 6             | 0           | 1.736895                | -0.678469 | 0.154165  |
| 7             | 1             | 0           | 3.389243                | -2.044572 | 0.205405  |
| 8             | 1             | 0           | 5.158689                | -0.367942 | -0.032971 |
| 9             | 1             | 0           | 4.645359                | 2.076792  | -0.223836 |
| 10            | 6             | 0           | 0.631015                | -1.676567 | 0.300000  |
| 11            | 1             | 0           | 1.042176                | -2.687371 | 0.249871  |
| 12            | 1             | 0           | 0.163054                | -1.556582 | 1.281827  |
| 13            | 6             | 0           | -0.433712               | -1.517375 | -0.786017 |
| 14            | 1             | 0           | 0.010349                | -1.716095 | -1.765070 |
| 15            | 1             | 0           | -1.226258               | -2.257741 | -0.622125 |
| 16            | 8             | 0           | -0.955633               | -0.201267 | -0.813938 |
| 17            | 14            | 0           | -2.310463               | 0.298363  | 0.036710  |
| 18            | 6             | 0           | -2.129952               | -0.085990 | 1.859243  |
| 19            | 1             | 0           | -2.988497               | 0.317713  | 2.406011  |
| 20            | 1             | 0           | -2.097592               | -1.163274 | 2.047424  |
| 21            | 1             | 0           | -1.225447               | 0.364218  | 2.278718  |
| 22            | 6             | 0           | -2.396702               | 2.137106  | -0.250228 |
| 23            | 1             | 0           | -3.258590               | 2.571586  | 0.264608  |
| 24            | 1             | 0           | -1.496268               | 2.631766  | 0.125358  |
| 25            | 1             | 0           | -2.489473               | 2.366249  | -1.315343 |
| 26            | 6             | 0           | -3.824473               | -0.571806 | -0.633678 |

|    |   |   |           |           |           |
|----|---|---|-----------|-----------|-----------|
| 27 | 1 | 0 | -4.722186 | -0.225717 | -0.111652 |
| 28 | 1 | 0 | -3.958588 | -0.370323 | -1.700254 |
| 29 | 1 | 0 | -3.763069 | -1.655535 | -0.497228 |

<sup>a</sup> Atomic Units = Hartrees

### M06-2X/6-31G(d)

Sum of electronic and thermal Enthalpies = -792.947189 A.U.<sup>a</sup>

| Center<br>Number | Atomic<br>Number | Atomic<br>Type | Coordinates (Angstroms) |           |           |
|------------------|------------------|----------------|-------------------------|-----------|-----------|
|                  |                  |                | X                       | Y         | Z         |
| 1                | 6                | 0              | 3.036817                | -0.983305 | 0.139713  |
| 2                | 6                | 0              | 4.013023                | 0.022502  | 0.011526  |
| 3                | 6                | 0              | 3.689965                | 1.384087  | -0.123542 |
| 4                | 6                | 0              | 2.309827                | 1.571105  | -0.123308 |
| 5                | 6                | 0              | 1.485428                | 0.644877  | 0.000084  |
| 6                | 6                | 0              | 1.648405                | -0.722387 | 0.142482  |
| 7                | 1                | 0              | 3.359970                | -2.016950 | 0.244070  |
| 8                | 1                | 0              | 5.060351                | -0.268841 | 0.014471  |
| 9                | 1                | 0              | 4.448091                | 2.153818  | -0.220209 |
| 10               | 6                | 0              | 0.577963                | -1.760683 | 0.288680  |
| 11               | 1                | 0              | 1.023407                | -2.760087 | 0.254718  |
| 12               | 1                | 0              | 0.100781                | -1.651026 | 1.269621  |
| 13               | 6                | 0              | -0.486528               | -1.654123 | -0.808091 |
| 14               | 1                | 0              | -0.041614               | -1.918841 | -1.773288 |
| 15               | 1                | 0              | -1.290045               | -2.375277 | -0.603511 |
| 16               | 8                | 0              | -0.996860               | -0.341928 | -0.931672 |
| 17               | 14               | 0              | -2.193812               | 0.316945  | 0.040668  |
| 18               | 6                | 0              | -1.715503               | 0.307692  | 1.855925  |
| 19               | 1                | 0              | -2.419795               | 0.930286  | 2.421812  |
| 20               | 1                | 0              | -1.748879               | -0.698456 | 2.288115  |
| 21               | 1                | 0              | -0.710709               | 0.716481  | 2.014244  |
| 22               | 6                | 0              | -2.362289               | 2.072689  | -0.575775 |
| 23               | 1                | 0              | -3.144949               | 2.611393  | -0.029848 |
| 24               | 1                | 0              | -1.422765               | 2.621778  | -0.445201 |
| 25               | 1                | 0              | -2.618599               | 2.095284  | -1.640577 |
| 26               | 6                | 0              | -3.785443               | -0.648767 | -0.181297 |
| 27               | 1                | 0              | -4.592800               | -0.191027 | 0.402636  |
| 28               | 1                | 0              | -4.100131               | -0.666828 | -1.230523 |
| 29               | 1                | 0              | -3.684057               | -1.685628 | 0.159120  |

<sup>a</sup> Atomic Units = Hartrees

**M06-2X/ccpVTZ**Sum of electronic and thermal Enthalpies = -793.181349 A.U.<sup>a</sup>

| Center<br>Number | Atomic<br>Number | Atomic<br>Type | Coordinates (Angstroms) |           |           |
|------------------|------------------|----------------|-------------------------|-----------|-----------|
|                  |                  |                | X                       | Y         | Z         |
| 1                | 6                | 0              | 3.162187                | -1.012205 | 0.113273  |
| 2                | 6                | 0              | 4.213509                | -0.093670 | -0.020563 |
| 3                | 6                | 0              | 4.005349                | 1.287924  | -0.122962 |
| 4                | 6                | 0              | 2.649091                | 1.584984  | -0.080343 |
| 5                | 6                | 0              | 1.758477                | 0.734978  | 0.042693  |
| 6                | 6                | 0              | 1.804182                | -0.638777 | 0.157109  |
| 7                | 1                | 0              | 3.396300                | -2.068153 | 0.188839  |
| 8                | 1                | 0              | 5.228868                | -0.470253 | -0.047702 |
| 9                | 1                | 0              | 4.818619                | 1.991530  | -0.224112 |
| 10               | 6                | 0              | 0.665081                | -1.595062 | 0.298158  |
| 11               | 1                | 0              | 1.037782                | -2.616906 | 0.224718  |
| 12               | 1                | 0              | 0.211343                | -1.476566 | 1.285352  |
| 13               | 6                | 0              | -0.409485               | -1.374696 | -0.761190 |
| 14               | 1                | 0              | 0.019626                | -1.511681 | -1.756117 |
| 15               | 1                | 0              | -1.193062               | -2.129184 | -0.634211 |
| 16               | 8                | 0              | -0.937397               | -0.064972 | -0.687943 |
| 17               | 14               | 0              | -2.399872               | 0.280632  | 0.038276  |
| 18               | 6                | 0              | -2.424660               | -0.392632 | 1.782901  |
| 19               | 1                | 0              | -3.391383               | -0.192728 | 2.251158  |
| 20               | 1                | 0              | -2.271936               | -1.474268 | 1.794192  |
| 21               | 1                | 0              | -1.650928               | 0.070034  | 2.398714  |
| 22               | 6                | 0              | -2.518094               | 2.138692  | 0.024710  |
| 23               | 1                | 0              | -3.443856               | 2.470604  | 0.499121  |
| 24               | 1                | 0              | -1.682481               | 2.584772  | 0.567619  |
| 25               | 1                | 0              | -2.505169               | 2.524564  | -0.996312 |
| 26               | 6                | 0              | -3.781473               | -0.496306 | -0.952412 |
| 27               | 1                | 0              | -4.752110               | -0.246406 | -0.518265 |
| 28               | 1                | 0              | -3.771117               | -0.138713 | -1.983936 |
| 29               | 1                | 0              | -3.698104               | -1.585095 | -0.969619 |

<sup>a</sup> Atomic Units = Hartrees

## Computed energy and geometry of II

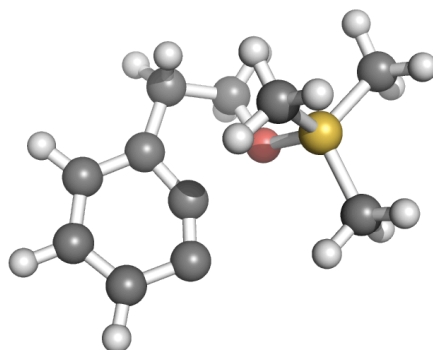

### M06-2X/6-311G(d,p)

Sum of electronic and thermal Enthalpies = -793.112966 A.U.<sup>a</sup>

Imaginary frequency: -163.4714 cm<sup>-1</sup>

| Center<br>Number | Atomic<br>Number | Atomic<br>Type | Coordinates (Angstroms) |           |           |
|------------------|------------------|----------------|-------------------------|-----------|-----------|
|                  |                  |                | X                       | Y         | Z         |
| 1                | 6                | 0              | 3.013861                | -0.821534 | 0.366797  |
| 2                | 6                | 0              | 3.695884                | 0.400567  | 0.249491  |
| 3                | 6                | 0              | 3.052741                | 1.566140  | -0.176619 |
| 4                | 6                | 0              | 1.670642                | 1.528038  | -0.513676 |
| 5                | 6                | 0              | 1.220420                | 0.341792  | -0.344513 |
| 6                | 6                | 0              | 1.651876                | -0.897110 | 0.049004  |
| 7                | 1                | 0              | 3.532960                | -1.713558 | 0.700953  |
| 8                | 1                | 0              | 4.752069                | 0.434741  | 0.496128  |
| 9                | 1                | 0              | 3.626418                | 2.486254  | -0.250175 |
| 10               | 6                | 0              | 0.703993                | -2.053174 | 0.096381  |
| 11               | 1                | 0              | 1.179743                | -2.987190 | -0.204735 |
| 12               | 1                | 0              | 0.323253                | -2.177198 | 1.114754  |
| 13               | 6                | 0              | -0.433388               | -1.687163 | -0.861787 |
| 14               | 1                | 0              | -0.142414               | -1.885799 | -1.894464 |
| 15               | 1                | 0              | -1.343369               | -2.248513 | -0.636644 |
| 16               | 8                | 0              | -0.670642               | -0.275777 | -0.758478 |
| 17               | 14               | 0              | -1.994338               | 0.343781  | 0.136873  |
| 18               | 6                | 0              | -1.889794               | -0.335964 | 1.870452  |
| 19               | 1                | 0              | -2.705811               | 0.069302  | 2.477047  |
| 20               | 1                | 0              | -1.974273               | -1.426334 | 1.887255  |
| 21               | 1                | 0              | -0.947130               | -0.052125 | 2.347641  |
| 22               | 6                | 0              | -1.811005               | 2.192495  | 0.092555  |
| 23               | 1                | 0              | -2.721378               | 2.656979  | 0.484344  |
| 24               | 1                | 0              | -0.968968               | 2.534235  | 0.698099  |
| 25               | 1                | 0              | -1.665546               | 2.551158  | -0.929914 |
| 26               | 6                | 0              | -3.546438               | -0.214084 | -0.730383 |
| 27               | 1                | 0              | -4.425933               | 0.181983  | -0.213335 |

|    |   |   |           |           |           |
|----|---|---|-----------|-----------|-----------|
| 28 | 1 | 0 | -3.569178 | 0.152778  | -1.760234 |
| 29 | 1 | 0 | -3.637329 | -1.303453 | -0.751322 |

-----  
<sup>a</sup> Atomic Units = Hartrees

### M06-2X/6-31G(d)

Sum of electronic and thermal Enthalpies = -792.942197 A.U.<sup>a</sup>

Imaginary frequency: -169.7033 cm<sup>-1</sup>

| Center<br>Number | Atomic<br>Number | Atomic<br>Type | Coordinates (Angstroms) |           |           |
|------------------|------------------|----------------|-------------------------|-----------|-----------|
|                  |                  |                | X                       | Y         | Z         |
| 1                | 6                | 0              | -2.968182               | 0.812981  | 0.382676  |
| 2                | 6                | 0              | -3.630697               | -0.421564 | 0.268993  |
| 3                | 6                | 0              | -2.972238               | -1.573616 | -0.177832 |
| 4                | 6                | 0              | -1.599599               | -1.513885 | -0.547312 |
| 5                | 6                | 0              | -1.170673               | -0.312950 | -0.385374 |
| 6                | 6                | 0              | -1.613387               | 0.914873  | 0.036276  |
| 7                | 1                | 0              | -3.496313               | 1.692860  | 0.740506  |
| 8                | 1                | 0              | -4.682179               | -0.477038 | 0.539260  |
| 9                | 1                | 0              | -3.533498               | -2.505798 | -0.238626 |
| 10               | 6                | 0              | -0.675967               | 2.079853  | 0.089707  |
| 11               | 1                | 0              | -1.160279               | 3.017273  | -0.195960 |
| 12               | 1                | 0              | -0.288158               | 2.199822  | 1.108310  |
| 13               | 6                | 0              | 0.457503                | 1.736666  | -0.883809 |
| 14               | 1                | 0              | 0.159572                | 1.963354  | -1.910858 |
| 15               | 1                | 0              | 1.371810                | 2.290766  | -0.651888 |
| 16               | 8                | 0              | 0.698817                | 0.324436  | -0.831937 |
| 17               | 14               | 0              | 1.936104                | -0.355437 | 0.147748  |
| 18               | 6                | 0              | 1.465882                | -0.150005 | 1.945027  |
| 19               | 1                | 0              | 2.214945                | -0.631167 | 2.585238  |
| 20               | 1                | 0              | 1.420397                | 0.907449  | 2.228712  |
| 21               | 1                | 0              | 0.494985                | -0.607851 | 2.163174  |
| 22               | 6                | 0              | 2.024729                | -2.141104 | -0.375249 |
| 23               | 1                | 0              | 2.814896                | -2.660349 | 0.179145  |
| 24               | 1                | 0              | 1.080100                | -2.662604 | -0.194013 |
| 25               | 1                | 0              | 2.255469                | -2.221147 | -1.443174 |
| 26               | 6                | 0              | 3.524472                | 0.550338  | -0.244843 |
| 27               | 1                | 0              | 4.368198                | 0.027548  | 0.221205  |
| 28               | 1                | 0              | 3.705562                | 0.579424  | -1.325012 |
| 29               | 1                | 0              | 3.527439                | 1.578573  | 0.131440  |

-----  
<sup>a</sup> Atomic Units = Hartrees



**M06-2X/ccpVTZ**Sum of electronic and thermal Enthalpies = -793.175463 A.U.<sup>a</sup>Imaginary frequency: -164.1869 cm<sup>-1</sup>

---

| Center<br>Number | Atomic<br>Number | Atomic<br>Type | Coordinates (Angstroms) |           |           |
|------------------|------------------|----------------|-------------------------|-----------|-----------|
|                  |                  |                | X                       | Y         | Z         |
| 1                | 6                | 0              | 3.014060                | -0.823674 | 0.362346  |
| 2                | 6                | 0              | 3.698570                | 0.392997  | 0.246301  |
| 3                | 6                | 0              | 3.060459                | 1.559514  | -0.173998 |
| 4                | 6                | 0              | 1.679248                | 1.528250  | -0.504816 |
| 5                | 6                | 0              | 1.227631                | 0.344674  | -0.337549 |
| 6                | 6                | 0              | 1.653509                | -0.893816 | 0.049958  |
| 7                | 1                | 0              | 3.530284                | -1.716922 | 0.691323  |
| 8                | 1                | 0              | 4.753838                | 0.422350  | 0.489017  |
| 9                | 1                | 0              | 3.635976                | 2.475852  | -0.248032 |
| 10               | 6                | 0              | 0.705292                | -2.044998 | 0.094628  |
| 11               | 1                | 0              | 1.175468                | -2.977801 | -0.210860 |
| 12               | 1                | 0              | 0.328226                | -2.173250 | 1.111735  |
| 13               | 6                | 0              | -0.433187               | -1.671788 | -0.854379 |
| 14               | 1                | 0              | -0.149075               | -1.871887 | -1.887020 |
| 15               | 1                | 0              | -1.341728               | -2.230667 | -0.626704 |
| 16               | 8                | 0              | -0.666619               | -0.263371 | -0.747473 |
| 17               | 14               | 0              | -1.995341               | 0.341982  | 0.133410  |
| 18               | 6                | 0              | -1.918957               | -0.357027 | 1.859272  |
| 19               | 1                | 0              | -2.747365               | 0.034290  | 2.454332  |
| 20               | 1                | 0              | -1.997094               | -1.445964 | 1.857797  |
| 21               | 1                | 0              | -0.988384               | -0.075031 | 2.356090  |
| 22               | 6                | 0              | -1.814204               | 2.190232  | 0.115379  |
| 23               | 1                | 0              | -2.725615               | 2.646601  | 0.508643  |
| 24               | 1                | 0              | -0.977440               | 2.521601  | 0.730554  |
| 25               | 1                | 0              | -1.663273               | 2.562044  | -0.899460 |
| 26               | 6                | 0              | -3.535673               | -0.208202 | -0.756973 |
| 27               | 1                | 0              | -4.419743               | 0.187141  | -0.251768 |
| 28               | 1                | 0              | -3.541942               | 0.159520  | -1.784590 |
| 29               | 1                | 0              | -3.624892               | -1.295620 | -0.780022 |

---

<sup>a</sup> Atomic Units = Hartrees

**Computed energy and geometry of III**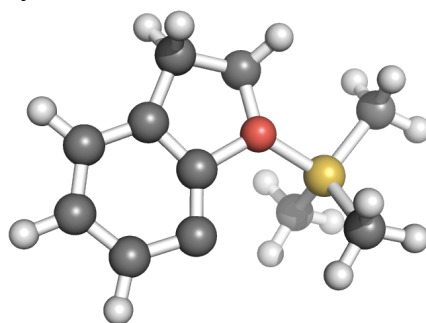**M06-2X/6-311G(d,p)**

---

Sum of electronic and thermal Enthalpies = -793.124734 A.U.<sup>a</sup>

---

| Center Number | Atomic Number | Atomic Type | Coordinates (Angstroms) |           |           |
|---------------|---------------|-------------|-------------------------|-----------|-----------|
|               |               |             | X                       | Y         | Z         |
| 1             | 6             | 0           | 3.198375                | 0.482288  | 0.036669  |
| 2             | 6             | 0           | 3.458829                | -0.891791 | 0.078975  |
| 3             | 6             | 0           | 2.418036                | -1.823990 | 0.011205  |
| 4             | 6             | 0           | 1.040094                | -1.489997 | -0.094204 |
| 5             | 6             | 0           | 0.927787                | -0.130134 | -0.120055 |
| 6             | 6             | 0           | 1.873671                | 0.880866  | -0.067105 |
| 7             | 1             | 0           | 3.998951                | 1.212040  | 0.084402  |
| 8             | 1             | 0           | 4.485701                | -1.233732 | 0.166397  |
| 9             | 1             | 0           | 2.705447                | -2.874525 | 0.048108  |
| 10            | 6             | 0           | 1.245626                | 2.243601  | -0.174148 |
| 11            | 1             | 0           | 1.656946                | 2.967400  | 0.529358  |
| 12            | 1             | 0           | 1.353949                | 2.641442  | -1.186084 |
| 13            | 6             | 0           | -0.219447               | 1.957346  | 0.144779  |
| 14            | 1             | 0           | -0.430251               | 2.033321  | 1.212354  |
| 15            | 1             | 0           | -0.929225               | 2.535983  | -0.438258 |
| 16            | 8             | 0           | -0.398446               | 0.536323  | -0.226654 |
| 17            | 14            | 0           | -1.946415               | -0.346380 | 0.017966  |
| 18            | 6             | 0           | -2.159798               | -1.498537 | -1.416851 |
| 19            | 1             | 0           | -3.226611               | -1.707607 | -1.546585 |
| 20            | 1             | 0           | -1.800460               | -1.026523 | -2.335728 |
| 21            | 1             | 0           | -1.627103               | -2.438536 | -1.279574 |
| 22            | 6             | 0           | -1.889452               | -1.080516 | 1.719580  |
| 23            | 1             | 0           | -2.907591               | -1.329023 | 2.035744  |
| 24            | 1             | 0           | -1.277700               | -1.981187 | 1.763366  |
| 25            | 1             | 0           | -1.490273               | -0.352628 | 2.432981  |
| 26            | 6             | 0           | -3.177582               | 1.044302  | -0.065391 |
| 27            | 1             | 0           | -4.178257               | 0.610437  | 0.032294  |
| 28            | 1             | 0           | -3.053540               | 1.768296  | 0.743675  |
| 29            | 1             | 0           | -3.139439               | 1.572951  | -1.021469 |

---

<sup>a</sup> Atomic Units = Hartrees

### M06-2X/6-31G(d)

Sum of electronic and thermal Enthalpies = -792.953718 A.U.<sup>a</sup>

| Center<br>Number | Atomic<br>Number | Atomic<br>Type | Coordinates (Angstroms) |           |           |
|------------------|------------------|----------------|-------------------------|-----------|-----------|
|                  |                  |                | X                       | Y         | Z         |
| 1                | 6                | 0              | 3.187445                | -0.468167 | -0.066262 |
| 2                | 6                | 0              | 3.429029                | 0.911302  | -0.101432 |
| 3                | 6                | 0              | 2.378535                | 1.831911  | 0.008518  |
| 4                | 6                | 0              | 1.006703                | 1.484811  | 0.155068  |
| 5                | 6                | 0              | 0.919460                | 0.121855  | 0.168494  |
| 6                | 6                | 0              | 1.869226                | -0.883939 | 0.074109  |
| 7                | 1                | 0              | 3.996665                | -1.188275 | -0.148971 |
| 8                | 1                | 0              | 4.450807                | 1.266260  | -0.218525 |
| 9                | 1                | 0              | 2.658431                | 2.887820  | -0.029012 |
| 10               | 6                | 0              | 1.250151                | -2.252344 | 0.177621  |
| 11               | 1                | 0              | 1.641236                | -2.966249 | -0.550922 |
| 12               | 1                | 0              | 1.388909                | -2.673096 | 1.179022  |
| 13               | 6                | 0              | -0.227241               | -1.965246 | -0.093410 |
| 14               | 1                | 0              | -0.467768               | -2.026660 | -1.157828 |
| 15               | 1                | 0              | -0.921692               | -2.557132 | 0.498793  |
| 16               | 8                | 0              | -0.401053               | -0.555104 | 0.310655  |
| 17               | 14               | 0              | -1.922306               | 0.347107  | -0.035427 |
| 18               | 6                | 0              | -2.200564               | 1.559491  | 1.343950  |
| 19               | 1                | 0              | -3.272851               | 1.777498  | 1.416407  |
| 20               | 1                | 0              | -1.884271               | 1.126532  | 2.299435  |
| 21               | 1                | 0              | -1.654277               | 2.491322  | 1.191705  |
| 22               | 6                | 0              | -1.785298               | 1.010120  | -1.766853 |
| 23               | 1                | 0              | -2.786636               | 1.253243  | -2.141537 |
| 24               | 1                | 0              | -1.161411               | 1.904380  | -1.817614 |
| 25               | 1                | 0              | -1.358497               | 0.251893  | -2.434006 |
| 26               | 6                | 0              | -3.179763               | -1.027847 | 0.052340  |
| 27               | 1                | 0              | -4.175850               | -0.585714 | -0.072640 |
| 28               | 1                | 0              | -3.051566               | -1.774401 | -0.738053 |
| 29               | 1                | 0              | -3.166619               | -1.537764 | 1.021625  |

<sup>a</sup> Atomic Units = Hartrees

### M06-2X/ccpVTZ

Sum of electronic and thermal Enthalpies = -793.186682 A.U.<sup>a</sup>

| Center<br>Number | Atomic<br>Number | Atomic<br>Type | Coordinates (Angstroms) |           |           |
|------------------|------------------|----------------|-------------------------|-----------|-----------|
|                  |                  |                | X                       | Y         | Z         |
| 1                | 6                | 0              | 3.182143                | 0.487908  | 0.056617  |
| 2                | 6                | 0              | 3.447542                | -0.881739 | 0.092841  |
| 3                | 6                | 0              | 2.415466                | -1.816371 | -0.002014 |
| 4                | 6                | 0              | 1.042231                | -1.486293 | -0.130587 |
| 5                | 6                | 0              | 0.920589                | -0.129480 | -0.145183 |
| 6                | 6                | 0              | 1.861015                | 0.881161  | -0.068058 |
| 7                | 1                | 0              | 3.977402                | 1.218966  | 0.124255  |
| 8                | 1                | 0              | 4.472312                | -1.219387 | 0.196257  |
| 9                | 1                | 0              | 2.706338                | -2.863649 | 0.030652  |
| 10               | 6                | 0              | 1.232995                | 2.240299  | -0.176238 |
| 11               | 1                | 0              | 1.623781                | 2.957233  | 0.542473  |
| 12               | 1                | 0              | 1.365413                | 2.649843  | -1.178371 |
| 13               | 6                | 0              | -0.235642               | 1.946743  | 0.103192  |
| 14               | 1                | 0              | -0.472751               | 2.021784  | 1.163308  |
| 15               | 1                | 0              | -0.931981               | 2.524517  | -0.492898 |
| 16               | 8                | 0              | -0.404388               | 0.528491  | -0.275831 |
| 17               | 14               | 0              | -1.934246               | -0.345885 | 0.029905  |
| 18               | 6                | 0              | -2.171786               | -1.559219 | -1.349149 |
| 19               | 1                | 0              | -3.241887               | -1.679469 | -1.534158 |
| 20               | 1                | 0              | -1.713942               | -1.185261 | -2.266673 |
| 21               | 1                | 0              | -1.740170               | -2.531081 | -1.121050 |
| 22               | 6                | 0              | -1.834674               | -1.011395 | 1.755950  |
| 23               | 1                | 0              | -2.845147               | -1.216831 | 2.117072  |
| 24               | 1                | 0              | -1.248811               | -1.926258 | 1.813832  |
| 25               | 1                | 0              | -1.390396               | -0.268685 | 2.422757  |
| 26               | 6                | 0              | -3.174109               | 1.032904  | -0.086883 |
| 27               | 1                | 0              | -4.169290               | 0.594231  | 0.021237  |
| 28               | 1                | 0              | -3.053706               | 1.776739  | 0.701521  |
| 29               | 1                | 0              | -3.137231               | 1.534663  | -1.055166 |

<sup>a</sup> Atomic Units = Hartrees

**Computed energy and geometry of IV**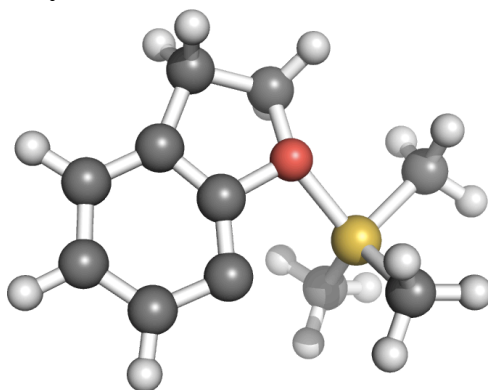**M06-2X/6-311G(d,p)**

Sum of electronic and thermal Enthalpies = -793.115579 A.U.<sup>a</sup>

Imaginary frequency: -163.8221 cm<sup>-1</sup>

| Center Number | Atomic Number | Atomic Type | Coordinates (Angstroms) |           |           |
|---------------|---------------|-------------|-------------------------|-----------|-----------|
|               |               |             | X                       | Y         | Z         |
| 1             | 6             | 0           | 3.137571                | -0.030714 | 0.056369  |
| 2             | 6             | 0           | 2.969904                | -1.424588 | 0.082634  |
| 3             | 6             | 0           | 1.707561                | -2.036191 | -0.010065 |
| 4             | 6             | 0           | 0.518390                | -1.284945 | -0.156597 |
| 5             | 6             | 0           | 0.832104                | 0.036159  | -0.220523 |
| 6             | 6             | 0           | 1.996704                | 0.751813  | -0.092794 |
| 7             | 1             | 0           | 4.121752                | 0.410160  | 0.167022  |
| 8             | 1             | 0           | 3.849401                | -2.048493 | 0.206652  |
| 9             | 1             | 0           | 1.675656                | -3.121525 | 0.059851  |
| 10            | 6             | 0           | 1.653813                | 2.226756  | -0.128655 |
| 11            | 1             | 0           | 2.166951                | 2.813813  | 0.632871  |
| 12            | 1             | 0           | 1.877290                | 2.657445  | -1.107623 |
| 13            | 6             | 0           | 0.129742                | 2.218314  | 0.131032  |
| 14            | 1             | 0           | -0.101467               | 2.278168  | 1.195450  |
| 15            | 1             | 0           | -0.431634               | 2.956195  | -0.434253 |
| 16            | 8             | 0           | -0.292308               | 0.884074  | -0.331632 |
| 17            | 14            | 0           | -1.729449               | -0.339012 | 0.021119  |
| 18            | 6             | 0           | -2.304660               | -1.351527 | -1.440158 |
| 19            | 1             | 0           | -3.380864               | -1.232114 | -1.599156 |
| 20            | 1             | 0           | -1.792635               | -1.005702 | -2.343487 |
| 21            | 1             | 0           | -2.065612               | -2.408068 | -1.308336 |
| 22            | 6             | 0           | -1.786381               | -0.995737 | 1.771109  |
| 23            | 1             | 0           | -2.770036               | -0.815719 | 2.216307  |
| 24            | 1             | 0           | -1.554638               | -2.061191 | 1.811334  |
| 25            | 1             | 0           | -1.043558               | -0.470870 | 2.381148  |
| 26            | 6             | 0           | -2.925787               | 1.130698  | 0.054885  |

|    |   |   |           |          |           |
|----|---|---|-----------|----------|-----------|
| 27 | 1 | 0 | -3.942274 | 0.760568 | 0.226980  |
| 28 | 1 | 0 | -2.696968 | 1.837509 | 0.859480  |
| 29 | 1 | 0 | -2.934376 | 1.683181 | -0.890271 |

<sup>a</sup> Atomic Units = Hartrees

**M06-2X/6-31G(d)**

Sum of electronic and thermal Enthalpies = -792.948388 A.U.<sup>a</sup>

Imaginary frequency: -135.0053 cm<sup>-1</sup>

| Center<br>Number | Atomic<br>Number | Atomic<br>Type | Coordinates (Angstroms) |           |           |
|------------------|------------------|----------------|-------------------------|-----------|-----------|
|                  |                  |                | X                       | Y         | Z         |
| 1                | 6                | 0              | 3.143331                | 0.045112  | 0.063824  |
| 2                | 6                | 0              | 3.027622                | -1.354911 | 0.091781  |
| 3                | 6                | 0              | 1.787726                | -2.011082 | -0.013052 |
| 4                | 6                | 0              | 0.566721                | -1.312316 | -0.175073 |
| 5                | 6                | 0              | 0.836505                | 0.020670  | -0.238374 |
| 6                | 6                | 0              | 1.973524                | 0.782856  | -0.099386 |
| 7                | 1                | 0              | 4.109818                | 0.525880  | 0.184401  |
| 8                | 1                | 0              | 3.930078                | -1.946543 | 0.227226  |
| 9                | 1                | 0              | 1.798847                | -3.099499 | 0.060036  |
| 10               | 6                | 0              | 1.582436                | 2.245453  | -0.134343 |
| 11               | 1                | 0              | 2.073039                | 2.851017  | 0.631013  |
| 12               | 1                | 0              | 1.792924                | 2.691637  | -1.111867 |
| 13               | 6                | 0              | 0.059666                | 2.184237  | 0.121966  |
| 14               | 1                | 0              | -0.176216               | 2.220931  | 1.188310  |
| 15               | 1                | 0              | -0.528521               | 2.911253  | -0.433946 |
| 16               | 8                | 0              | -0.316939               | 0.845044  | -0.363894 |
| 17               | 14               | 0              | -1.732839               | -0.347162 | 0.025033  |
| 18               | 6                | 0              | -2.304403               | -1.384588 | -1.424507 |
| 19               | 1                | 0              | -3.383988               | -1.272854 | -1.579332 |
| 20               | 1                | 0              | -1.799920               | -1.050500 | -2.338430 |
| 21               | 1                | 0              | -2.062249               | -2.440521 | -1.279965 |
| 22               | 6                | 0              | -1.732232               | -1.001237 | 1.780517  |
| 23               | 1                | 0              | -2.704009               | -0.819268 | 2.254712  |
| 24               | 1                | 0              | -1.502097               | -2.068900 | 1.818268  |
| 25               | 1                | 0              | -0.970765               | -0.477264 | 2.371049  |
| 26               | 6                | 0              | -2.956126               | 1.101069  | 0.075921  |
| 27               | 1                | 0              | -3.965877               | 0.711498  | 0.258000  |
| 28               | 1                | 0              | -2.735650               | 1.811136  | 0.882622  |
| 29               | 1                | 0              | -2.988772               | 1.660330  | -0.867048 |

<sup>a</sup> Atomic Units = Hartrees

**M06-2X/ccpVTZ**Sum of electronic and thermal Enthalpies = -793.176756 A.U.<sup>a</sup>Imaginary frequency: -165.4977 cm<sup>-1</sup>

| Center<br>Number | Atomic<br>Number | Atomic<br>Type | Coordinates (Angstroms) |           |           |
|------------------|------------------|----------------|-------------------------|-----------|-----------|
|                  |                  |                | X                       | Y         | Z         |
| 1                | 6                | 0              | 3.123004                | -0.035403 | 0.060352  |
| 2                | 6                | 0              | 2.951600                | -1.425893 | 0.085402  |
| 3                | 6                | 0              | 1.691335                | -2.033021 | -0.013703 |
| 4                | 6                | 0              | 0.508672                | -1.278758 | -0.169100 |
| 5                | 6                | 0              | 0.824677                | 0.038515  | -0.231366 |
| 6                | 6                | 0              | 1.988395                | 0.749096  | -0.095388 |
| 7                | 1                | 0              | 4.106425                | 0.400710  | 0.177757  |
| 8                | 1                | 0              | 3.827114                | -2.050955 | 0.214683  |
| 9                | 1                | 0              | 1.656181                | -3.116144 | 0.057713  |
| 10               | 6                | 0              | 1.650005                | 2.222201  | -0.126126 |
| 11               | 1                | 0              | 2.159209                | 2.804008  | 0.638967  |
| 12               | 1                | 0              | 1.879379                | 2.657945  | -1.099243 |
| 13               | 6                | 0              | 0.127437                | 2.214828  | 0.124798  |
| 14               | 1                | 0              | -0.108052               | 2.269419  | 1.186426  |
| 15               | 1                | 0              | -0.428646               | 2.957850  | -0.435323 |
| 16               | 8                | 0              | -0.297070               | 0.887052  | -0.348419 |
| 17               | 14               | 0              | -1.708011               | -0.337574 | 0.021596  |
| 18               | 6                | 0              | -2.309403               | -1.350851 | -1.428318 |
| 19               | 1                | 0              | -3.382636               | -1.218153 | -1.581444 |
| 20               | 1                | 0              | -1.797929               | -1.020742 | -2.335417 |
| 21               | 1                | 0              | -2.085142               | -2.407691 | -1.288576 |
| 22               | 6                | 0              | -1.758078               | -0.987675 | 1.773680  |
| 23               | 1                | 0              | -2.734257               | -0.797826 | 2.225747  |
| 24               | 1                | 0              | -1.537038               | -2.053402 | 1.814991  |
| 25               | 1                | 0              | -1.006050               | -0.468868 | 2.374014  |
| 26               | 6                | 0              | -2.916165               | 1.124083  | 0.067964  |
| 27               | 1                | 0              | -3.924827               | 0.744558  | 0.252092  |
| 28               | 1                | 0              | -2.683547               | 1.830862  | 0.868821  |
| 29               | 1                | 0              | -2.940326               | 1.675320  | -0.875378 |

<sup>a</sup> Atomic Units = Hartrees

### Computed energy and geometry of V

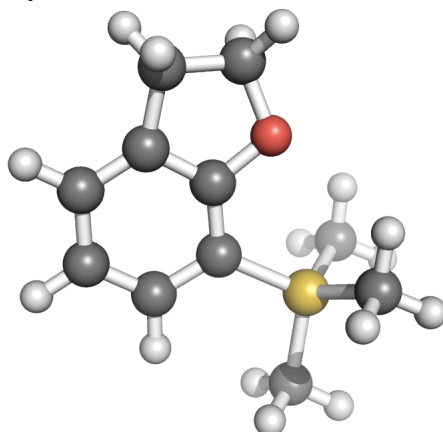

#### M06-2X/6-311G(d,p)

Sum of electronic and thermal Enthalpies = -793.206783 A.U.<sup>a</sup>

| Center<br>Number | Atomic<br>Number | Atomic<br>Type | Coordinates (Angstroms) |           |           |
|------------------|------------------|----------------|-------------------------|-----------|-----------|
|                  |                  |                | X                       | Y         | Z         |
| 1                | 6                | 0              | 2.418791                | 1.688131  | -0.005979 |
| 2                | 6                | 0              | 1.302196                | 2.529640  | -0.047917 |
| 3                | 6                | 0              | 0.015965                | 1.994439  | -0.042624 |
| 4                | 6                | 0              | -0.221993               | 0.608657  | -0.005282 |
| 5                | 6                | 0              | 0.920772                | -0.185719 | 0.026644  |
| 6                | 6                | 0              | 2.220168                | 0.318692  | 0.027953  |
| 7                | 1                | 0              | 3.421544                | 2.101649  | 0.000053  |
| 8                | 1                | 0              | 1.438501                | 3.604190  | -0.081871 |
| 9                | 1                | 0              | -0.830858               | 2.673645  | -0.073104 |
| 10               | 6                | 0              | 3.170885                | -0.847850 | 0.139803  |
| 11               | 1                | 0              | 4.012415                | -0.793207 | -0.550573 |
| 12               | 1                | 0              | 3.562581                | -0.924774 | 1.157924  |
| 13               | 6                | 0              | 2.232758                | -2.018036 | -0.194508 |
| 14               | 1                | 0              | 2.289270                | -2.275635 | -1.255373 |
| 15               | 1                | 0              | 2.398527                | -2.908258 | 0.408108  |
| 16               | 8                | 0              | 0.888145                | -1.548446 | 0.072325  |
| 17               | 14               | 0              | -1.945459               | -0.159212 | 0.006667  |
| 18               | 6                | 0              | -3.207499               | 1.226735  | -0.038864 |
| 19               | 1                | 0              | -4.219795               | 0.813192  | 0.003516  |
| 20               | 1                | 0              | -3.091736               | 1.908294  | 0.808742  |
| 21               | 1                | 0              | -3.126967               | 1.812077  | -0.959476 |
| 22               | 6                | 0              | -2.140626               | -1.265475 | -1.496406 |
| 23               | 1                | 0              | -3.124346               | -1.744451 | -1.503984 |
| 24               | 1                | 0              | -2.035671               | -0.694563 | -2.423441 |
| 25               | 1                | 0              | -1.379447               | -2.050127 | -1.492492 |
| 26               | 6                | 0              | -2.147718               | -1.173865 | 1.571303  |
| 27               | 1                | 0              | -3.135194               | -1.643809 | 1.608220  |



|    |   |   |           |           |          |
|----|---|---|-----------|-----------|----------|
| 28 | 1 | 0 | -1.392866 | -1.963548 | 1.614096 |
| 29 | 1 | 0 | -2.036885 | -0.550253 | 2.462974 |

-----  
<sup>a</sup> Atomic Units = Hartrees

### M06-2X/6-31G(d)

Sum of electronic and thermal Enthalpies = -793.041642 A.U.<sup>a</sup>

| Center<br>Number | Atomic<br>Number | Atomic<br>Type | Coordinates (Angstroms) |           |           |
|------------------|------------------|----------------|-------------------------|-----------|-----------|
|                  |                  |                | X                       | Y         | Z         |
| 1                | 6                | 0              | 2.421984                | -1.691189 | 0.005097  |
| 2                | 6                | 0              | 1.303557                | -2.532635 | 0.045658  |
| 3                | 6                | 0              | 0.016530                | -1.994894 | 0.041413  |
| 4                | 6                | 0              | -0.221910               | -0.607917 | 0.006617  |
| 5                | 6                | 0              | 0.924114                | 0.185127  | -0.023706 |
| 6                | 6                | 0              | 2.224930                | -0.319557 | -0.027009 |
| 7                | 1                | 0              | 3.426193                | -2.106535 | -0.001293 |
| 8                | 1                | 0              | 1.439377                | -3.609296 | 0.077790  |
| 9                | 1                | 0              | -0.832508               | -2.674801 | 0.070511  |
| 10               | 6                | 0              | 3.177053                | 0.847283  | -0.130916 |
| 11               | 1                | 0              | 4.009138                | 0.797791  | 0.575192  |
| 12               | 1                | 0              | 3.592843                | 0.920280  | -1.142059 |
| 13               | 6                | 0              | 2.234537                | 2.023283  | 0.180720  |
| 14               | 1                | 0              | 2.298227                | 2.313175  | 1.234969  |
| 15               | 1                | 0              | 2.396503                | 2.900708  | -0.445927 |
| 16               | 8                | 0              | 0.890051                | 1.549356  | -0.065697 |
| 17               | 14               | 0              | -1.944722               | 0.158541  | -0.006221 |
| 18               | 6                | 0              | -3.211250               | -1.229547 | 0.040727  |
| 19               | 1                | 0              | -4.225704               | -0.816357 | -0.004920 |
| 20               | 1                | 0              | -3.096346               | -1.916136 | -0.805504 |
| 21               | 1                | 0              | -3.135059               | -1.815008 | 0.963981  |
| 22               | 6                | 0              | -2.148179               | 1.269087  | 1.498097  |
| 23               | 1                | 0              | -3.129521               | 1.757441  | 1.495488  |
| 24               | 1                | 0              | -2.059355               | 0.698652  | 2.429436  |
| 25               | 1                | 0              | -1.380467               | 2.049997  | 1.504998  |
| 26               | 6                | 0              | -2.155081               | 1.172458  | -1.575643 |
| 27               | 1                | 0              | -3.142664               | 1.647231  | -1.607094 |
| 28               | 1                | 0              | -1.397863               | 1.961903  | -1.629188 |
| 29               | 1                | 0              | -2.054792               | 0.547534  | -2.470037 |

-----  
<sup>a</sup> Atomic Units = Hartrees

**M06-2X/ccpVTZ**Sum of electronic and thermal Enthalpies = -793.266761 A.U.<sup>a</sup>

| Center<br>Number | Atomic<br>Number | Atomic<br>Type | Coordinates (Angstroms) |           |           |
|------------------|------------------|----------------|-------------------------|-----------|-----------|
|                  |                  |                | X                       | Y         | Z         |
| 1                | 6                | 0              | 2.410186                | 1.689837  | -0.006165 |
| 2                | 6                | 0              | 1.291849                | 2.524025  | -0.046229 |
| 3                | 6                | 0              | 0.011740                | 1.982915  | -0.041398 |
| 4                | 6                | 0              | -0.220133               | 0.599152  | -0.005710 |
| 5                | 6                | 0              | 0.924634                | -0.186845 | 0.024455  |
| 6                | 6                | 0              | 2.219145                | 0.322644  | 0.028367  |
| 7                | 1                | 0              | 3.408888                | 2.108306  | -0.000120 |
| 8                | 1                | 0              | 1.422169                | 3.597432  | -0.079257 |
| 9                | 1                | 0              | -0.836705               | 2.656946  | -0.070388 |
| 10               | 6                | 0              | 3.176680                | -0.835228 | 0.133398  |
| 11               | 1                | 0              | 4.010013                | -0.775970 | -0.563230 |
| 12               | 1                | 0              | 3.580744                | -0.906545 | 1.144872  |
| 13               | 6                | 0              | 2.247138                | -2.012796 | -0.186386 |
| 14               | 1                | 0              | 2.308168                | -2.286826 | -1.240947 |
| 15               | 1                | 0              | 2.418970                | -2.892050 | 0.427479  |
| 16               | 8                | 0              | 0.900705                | -1.549459 | 0.070593  |
| 17               | 14               | 0              | -1.945110               | -0.162531 | 0.006263  |
| 18               | 6                | 0              | -3.197718               | 1.229799  | -0.037703 |
| 19               | 1                | 0              | -4.210230               | 0.821955  | 0.000728  |
| 20               | 1                | 0              | -3.078606               | 1.905574  | 0.811318  |
| 21               | 1                | 0              | -3.109990               | 1.815975  | -0.954586 |
| 22               | 6                | 0              | -2.153069               | -1.263798 | -1.496887 |
| 23               | 1                | 0              | -3.141074               | -1.729226 | -1.500517 |
| 24               | 1                | 0              | -2.046264               | -0.691638 | -2.420488 |
| 25               | 1                | 0              | -1.403077               | -2.056205 | -1.498734 |
| 26               | 6                | 0              | -2.158441               | -1.173886 | 1.569806  |
| 27               | 1                | 0              | -3.150880               | -1.628649 | 1.603920  |
| 28               | 1                | 0              | -1.416194               | -1.972317 | 1.615810  |
| 29               | 1                | 0              | -2.042099               | -0.550580 | 2.458435  |

<sup>a</sup> Atomic Units = Hartrees

## Computed energy and geometry of VI

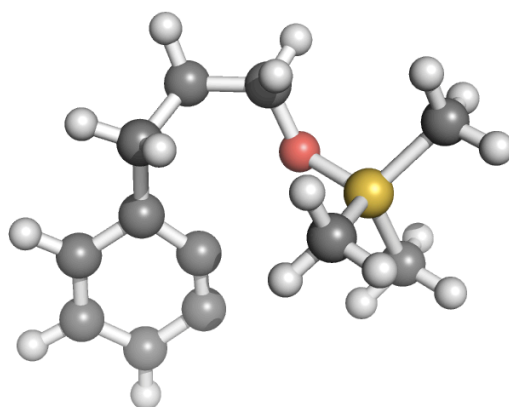

### M06-2X/6-311G(d,p)

Sum of electronic and thermal Enthalpies = -832.391922 A.U.<sup>a</sup>

| Center<br>Number | Atomic<br>Number | Atomic<br>Type | Coordinates (Angstroms) |           |           |
|------------------|------------------|----------------|-------------------------|-----------|-----------|
|                  |                  |                | X                       | Y         | Z         |
| 1                | 6                | 0              | -3.118714               | 0.509202  | 0.617470  |
| 2                | 6                | 0              | -3.841835               | -0.663371 | 0.341866  |
| 3                | 6                | 0              | -3.304097               | -1.724101 | -0.403053 |
| 4                | 6                | 0              | -1.994770               | -1.461835 | -0.810152 |
| 5                | 6                | 0              | -1.422667               | -0.396427 | -0.524005 |
| 6                | 6                | 0              | -1.791535               | 0.727315  | 0.182781  |
| 7                | 1                | 0              | -3.596211               | 1.300184  | 1.188890  |
| 8                | 1                | 0              | -4.857238               | -0.746767 | 0.715806  |
| 9                | 1                | 0              | -3.869886               | -2.622720 | -0.614748 |
| 10               | 6                | 0              | -1.012148               | 1.977118  | 0.475859  |
| 11               | 1                | 0              | -1.728264               | 2.752826  | 0.754565  |
| 12               | 1                | 0              | -0.383948               | 1.801370  | 1.358044  |
| 13               | 6                | 0              | -0.126172               | 2.462755  | -0.681037 |
| 14               | 1                | 0              | -0.614874               | 2.262021  | -1.639257 |
| 15               | 1                | 0              | 0.001355                | 3.546073  | -0.603341 |
| 16               | 6                | 0              | 1.259085                | 1.841226  | -0.674521 |
| 17               | 1                | 0              | 1.858429                | 2.249187  | -1.495128 |
| 18               | 1                | 0              | 1.760598                | 2.107994  | 0.266040  |
| 19               | 8                | 0              | 1.177593                | 0.428361  | -0.821180 |
| 20               | 14               | 0              | 2.072620                | -0.609592 | 0.145373  |
| 21               | 6                | 0              | 1.440474                | -0.522824 | 1.904529  |
| 22               | 1                | 0              | 1.993397                | -1.220786 | 2.541489  |
| 23               | 1                | 0              | 1.562192                | 0.477978  | 2.329812  |
| 24               | 1                | 0              | 0.380539                | -0.789945 | 1.955782  |
| 25               | 6                | 0              | 1.850381                | -2.316008 | -0.569671 |
| 26               | 1                | 0              | 2.466231                | -3.036267 | -0.022212 |
| 27               | 1                | 0              | 0.811288                | -2.648664 | -0.510018 |
| 28               | 1                | 0              | 2.157444                | -2.342564 | -1.618947 |

|    |   |   |          |           |           |
|----|---|---|----------|-----------|-----------|
| 29 | 6 | 0 | 3.872319 | -0.098662 | 0.088594  |
| 30 | 1 | 0 | 4.481695 | -0.768782 | 0.703058  |
| 31 | 1 | 0 | 4.259757 | -0.137779 | -0.933824 |
| 32 | 1 | 0 | 4.018149 | 0.917705  | 0.466246  |

<sup>a</sup> Atomic Units = Hartrees

### M06-2X/6-31G(d)

Sum of electronic and thermal Enthalpies = -832.210755 A.U.<sup>a</sup>

| Center<br>Number | Atomic<br>Number | Atomic<br>Type | Coordinates (Angstroms) |           |           |
|------------------|------------------|----------------|-------------------------|-----------|-----------|
|                  |                  |                | X                       | Y         | Z         |
| 1                | 6                | 0              | -3.256917               | 0.521997  | 0.408351  |
| 2                | 6                | 0              | -3.921372               | -0.692971 | 0.160962  |
| 3                | 6                | 0              | -3.257023               | -1.831890 | -0.324015 |
| 4                | 6                | 0              | -1.893584               | -1.600950 | -0.523566 |
| 5                | 6                | 0              | -1.382743               | -0.489087 | -0.274158 |
| 6                | 6                | 0              | -1.870560               | 0.710547  | 0.198656  |
| 7                | 1                | 0              | -3.830423               | 1.369420  | 0.778868  |
| 8                | 1                | 0              | -4.990765               | -0.746445 | 0.349089  |
| 9                | 1                | 0              | -3.779643               | -2.764159 | -0.513308 |
| 10               | 6                | 0              | -1.153325               | 2.002570  | 0.473467  |
| 11               | 1                | 0              | -1.913511               | 2.767250  | 0.660017  |
| 12               | 1                | 0              | -0.578171               | 1.902155  | 1.404917  |
| 13               | 6                | 0              | -0.207714               | 2.468401  | -0.645183 |
| 14               | 1                | 0              | -0.648196               | 2.256602  | -1.626330 |
| 15               | 1                | 0              | -0.084804               | 3.554959  | -0.573642 |
| 16               | 6                | 0              | 1.177350                | 1.850030  | -0.563828 |
| 17               | 1                | 0              | 1.829354                | 2.280107  | -1.335433 |
| 18               | 1                | 0              | 1.617195                | 2.099800  | 0.414105  |
| 19               | 8                | 0              | 1.107593                | 0.442132  | -0.745138 |
| 20               | 14               | 0              | 2.137001                | -0.571415 | 0.112807  |
| 21               | 6                | 0              | 1.636752                | -0.579534 | 1.920295  |
| 22               | 1                | 0              | 2.284400                | -1.249527 | 2.498495  |
| 23               | 1                | 0              | 1.716721                | 0.418069  | 2.367754  |
| 24               | 1                | 0              | 0.603729                | -0.924906 | 2.042654  |
| 25               | 6                | 0              | 1.961601                | -2.266786 | -0.652389 |
| 26               | 1                | 0              | 2.643317                | -2.976981 | -0.170079 |
| 27               | 1                | 0              | 0.943076                | -2.654876 | -0.550557 |
| 28               | 1                | 0              | 2.207432                | -2.240800 | -1.719803 |
| 29               | 6                | 0              | 3.898092                | 0.049078  | -0.066936 |
| 30               | 1                | 0              | 4.596599                | -0.611570 | 0.459975  |
| 31               | 1                | 0              | 4.198293                | 0.078644  | -1.120720 |

32                    1                    0                    4.023289                    1.056601                    0.345858

-----  
<sup>a</sup> Atomic Units = Hartrees

### M06-2X/ccpVTZ

Sum of electronic and thermal Enthalpies = -832.458474 A.U.<sup>a</sup>

| Center<br>Number | Atomic<br>Number | Atomic<br>Type | Coordinates (Angstroms) |           |           |
|------------------|------------------|----------------|-------------------------|-----------|-----------|
|                  |                  |                | X                       | Y         | Z         |
| 1                | 6                | 0              | -3.236930               | 0.548248  | 0.492097  |
| 2                | 6                | 0              | -3.964928               | -0.620679 | 0.229321  |
| 3                | 6                | 0              | -3.385833               | -1.755314 | -0.351986 |
| 4                | 6                | 0              | -2.032982               | -1.560505 | -0.619575 |
| 5                | 6                | 0              | -1.457835               | -0.495331 | -0.353984 |
| 6                | 6                | 0              | -1.863476               | 0.694044  | 0.204665  |
| 7                | 1                | 0              | -3.746961               | 1.395297  | 0.937527  |
| 8                | 1                | 0              | -5.018123               | -0.642219 | 0.482476  |
| 9                | 1                | 0              | -3.954460               | -2.651497 | -0.555346 |
| 10               | 6                | 0              | -1.081333               | 1.939849  | 0.487996  |
| 11               | 1                | 0              | -1.793951               | 2.718458  | 0.757581  |
| 12               | 1                | 0              | -0.454554               | 1.769922  | 1.369704  |
| 13               | 6                | 0              | -0.191561               | 2.415613  | -0.668518 |
| 14               | 1                | 0              | -0.666274               | 2.191149  | -1.625979 |
| 15               | 1                | 0              | -0.081674               | 3.499828  | -0.609471 |
| 16               | 6                | 0              | 1.201099                | 1.819464  | -0.636903 |
| 17               | 1                | 0              | 1.804022                | 2.229933  | -1.451624 |
| 18               | 1                | 0              | 1.683981                | 2.107005  | 0.305219  |
| 19               | 8                | 0              | 1.149331                | 0.406504  | -0.762928 |
| 20               | 14               | 0              | 2.166729                | -0.576808 | 0.123340  |
| 21               | 6                | 0              | 1.670986                | -0.515440 | 1.925420  |
| 22               | 1                | 0              | 2.322671                | -1.154583 | 2.526053  |
| 23               | 1                | 0              | 1.744906                | 0.497976  | 2.326118  |
| 24               | 1                | 0              | 0.644466                | -0.863459 | 2.060951  |
| 25               | 6                | 0              | 1.967901                | -2.291757 | -0.575495 |
| 26               | 1                | 0              | 2.650437                | -2.985728 | -0.080140 |
| 27               | 1                | 0              | 0.951241                | -2.663217 | -0.438259 |
| 28               | 1                | 0              | 2.193133                | -2.303525 | -1.643684 |
| 29               | 6                | 0              | 3.925572                | 0.026836  | -0.073803 |
| 30               | 1                | 0              | 4.617320                | -0.623607 | 0.466090  |
| 31               | 1                | 0              | 4.221778                | 0.033106  | -1.124912 |
| 32               | 1                | 0              | 4.049114                | 1.038270  | 0.318946  |

-----  
<sup>a</sup> Atomic Units = Hartrees

## Computed energy and geometry of VII

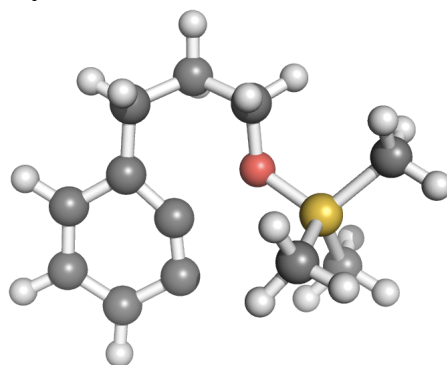

### M06-2X/6-311G(d,p)

Sum of electronic and thermal Enthalpies = -832.388976 A.U.<sup>a</sup>

Imaginary frequency: -154.6740 cm<sup>-1</sup>

| Center Number | Atomic Number | Atomic Type | Coordinates (Angstroms) |           |           |
|---------------|---------------|-------------|-------------------------|-----------|-----------|
|               |               |             | X                       | Y         | Z         |
| 1             | 6             | 0           | -3.287091               | 0.116342  | 0.224369  |
| 2             | 6             | 0           | -3.514331               | -1.257049 | 0.073288  |
| 3             | 6             | 0           | -2.466463               | -2.140184 | -0.203536 |
| 4             | 6             | 0           | -1.160276               | -1.614142 | -0.331691 |
| 5             | 6             | 0           | -1.124694               | -0.348295 | -0.160513 |
| 6             | 6             | 0           | -1.999404               | 0.672530  | 0.112034  |
| 7             | 1             | 0           | -4.115008               | 0.787722  | 0.431496  |
| 8             | 1             | 0           | -4.526842               | -1.635525 | 0.169618  |
| 9             | 1             | 0           | -2.676586               | -3.200064 | -0.317065 |
| 10            | 6             | 0           | -1.706848               | 2.137756  | 0.280585  |
| 11            | 1             | 0           | -2.599754               | 2.701699  | 0.002673  |
| 12            | 1             | 0           | -1.519404               | 2.342131  | 1.340959  |
| 13            | 6             | 0           | -0.503748               | 2.600060  | -0.535560 |
| 14            | 1             | 0           | -0.662509               | 2.392429  | -1.597972 |
| 15            | 1             | 0           | -0.383720               | 3.680367  | -0.422928 |
| 16            | 6             | 0           | 0.786786                | 1.946406  | -0.086199 |
| 17            | 1             | 0           | 1.633920                | 2.367059  | -0.633564 |
| 18            | 1             | 0           | 0.943589                | 2.119078  | 0.985321  |
| 19            | 8             | 0           | 0.729713                | 0.531930  | -0.340965 |
| 20            | 14            | 0           | 2.055428                | -0.477675 | 0.066208  |
| 21            | 6             | 0           | 1.744723                | -1.207424 | 1.754462  |
| 22            | 1             | 0           | 2.646295                | -1.710529 | 2.117714  |
| 23            | 1             | 0           | 1.490290                | -0.421102 | 2.471998  |
| 24            | 1             | 0           | 0.930753                | -1.935004 | 1.740571  |
| 25            | 6             | 0           | 2.251909                | -1.757986 | -1.271937 |
| 26            | 1             | 0           | 3.206838                | -2.277407 | -1.140595 |
| 27            | 1             | 0           | 1.453247                | -2.500658 | -1.258906 |

|    |   |   |          |           |           |
|----|---|---|----------|-----------|-----------|
| 28 | 1 | 0 | 2.265253 | -1.282482 | -2.256857 |
| 29 | 6 | 0 | 3.575764 | 0.609428  | 0.111582  |
| 30 | 1 | 0 | 4.443509 | -0.015415 | 0.347029  |
| 31 | 1 | 0 | 3.764843 | 1.085385  | -0.854721 |
| 32 | 1 | 0 | 3.513628 | 1.389672  | 0.874749  |

<sup>a</sup> Atomic Units = Hartrees

### M06-2X/6-31G(d)

Sum of electronic and thermal Enthalpies = -832.207909 A.U.<sup>a</sup>

Imaginary frequency: -160.9336 cm<sup>-1</sup>

| Center<br>Number | Atomic<br>Number | Atomic<br>Type | Coordinates (Angstroms) |           |           |
|------------------|------------------|----------------|-------------------------|-----------|-----------|
|                  |                  |                | X                       | Y         | Z         |
| 1                | 6                | 0              | -3.280752               | 0.103723  | 0.213072  |
| 2                | 6                | 0              | -3.494158               | -1.274635 | 0.079042  |
| 3                | 6                | 0              | -2.434106               | -2.150556 | -0.186231 |
| 4                | 6                | 0              | -1.132643               | -1.617253 | -0.323711 |
| 5                | 6                | 0              | -1.110785               | -0.343204 | -0.166964 |
| 6                | 6                | 0              | -1.997516               | 0.673006  | 0.093757  |
| 7                | 1                | 0              | -4.117299               | 0.769697  | 0.413528  |
| 8                | 1                | 0              | -4.504645               | -1.662737 | 0.179918  |
| 9                | 1                | 0              | -2.636664               | -3.216323 | -0.284779 |
| 10               | 6                | 0              | -1.725143               | 2.144713  | 0.252555  |
| 11               | 1                | 0              | -2.613633               | 2.699429  | -0.065388 |
| 12               | 1                | 0              | -1.580987               | 2.367969  | 1.318196  |
| 13               | 6                | 0              | -0.496949               | 2.613692  | -0.521756 |
| 14               | 1                | 0              | -0.626409               | 2.428906  | -1.594388 |
| 15               | 1                | 0              | -0.373548               | 3.692863  | -0.384604 |
| 16               | 6                | 0              | 0.777540                | 1.937618  | -0.054073 |
| 17               | 1                | 0              | 1.646796                | 2.383636  | -0.548159 |
| 18               | 1                | 0              | 0.895279                | 2.059231  | 1.031685  |
| 19               | 8                | 0              | 0.729760                | 0.540234  | -0.382957 |
| 20               | 14               | 0              | 2.044437                | -0.474512 | 0.062200  |
| 21               | 6                | 0              | 1.702424                | -1.194474 | 1.753779  |
| 22               | 1                | 0              | 2.601767                | -1.683552 | 2.146161  |
| 23               | 1                | 0              | 1.420593                | -0.403722 | 2.459223  |
| 24               | 1                | 0              | 0.894687                | -1.931148 | 1.728936  |
| 25               | 6                | 0              | 2.260232                | -1.759022 | -1.274520 |
| 26               | 1                | 0              | 3.154534                | -2.360002 | -1.070263 |
| 27               | 1                | 0              | 1.400446                | -2.430316 | -1.340211 |
| 28               | 1                | 0              | 2.396973                | -1.279122 | -2.250162 |
| 29               | 6                | 0              | 3.574297                | 0.606123  | 0.134997  |
| 30               | 1                | 0              | 4.440337                | -0.027242 | 0.363127  |

|    |   |   |          |          |           |
|----|---|---|----------|----------|-----------|
| 31 | 1 | 0 | 3.772204 | 1.100539 | -0.822520 |
| 32 | 1 | 0 | 3.514736 | 1.374798 | 0.912879  |

-----  
<sup>a</sup> Atomic Units = Hartrees

### M06-2X/ccpVTZ

Sum of electronic and thermal Enthalpies = -832.453974 A.U.<sup>a</sup>

Imaginary frequency: -167.2388 cm<sup>-1</sup>

| Center<br>Number | Atomic<br>Number | Atomic<br>Type | Coordinates (Angstroms) |           |           |
|------------------|------------------|----------------|-------------------------|-----------|-----------|
|                  |                  |                | X                       | Y         | Z         |
| 1                | 6                | 0              | -3.272975               | 0.113668  | 0.231595  |
| 2                | 6                | 0              | -3.499737               | -1.255594 | 0.078605  |
| 3                | 6                | 0              | -2.455309               | -2.134272 | -0.208515 |
| 4                | 6                | 0              | -1.151849               | -1.610463 | -0.344274 |
| 5                | 6                | 0              | -1.116161               | -0.345752 | -0.168991 |
| 6                | 6                | 0              | -1.989467               | 0.669955  | 0.111563  |
| 7                | 1                | 0              | -4.098113               | 0.783338  | 0.445034  |
| 8                | 1                | 0              | -4.509484               | -1.634615 | 0.180594  |
| 9                | 1                | 0              | -2.665584               | -3.191740 | -0.324938 |
| 10               | 6                | 0              | -1.702696               | 2.133195  | 0.276618  |
| 11               | 1                | 0              | -2.595743               | 2.692781  | -0.001078 |
| 12               | 1                | 0              | -1.516293               | 2.340994  | 1.334425  |
| 13               | 6                | 0              | -0.502816               | 2.594311  | -0.537602 |
| 14               | 1                | 0              | -0.665194               | 2.396818  | -1.599327 |
| 15               | 1                | 0              | -0.374636               | 3.670556  | -0.417513 |
| 16               | 6                | 0              | 0.781189                | 1.929388  | -0.096832 |
| 17               | 1                | 0              | 1.628980                | 2.350204  | -0.638321 |
| 18               | 1                | 0              | 0.939726                | 2.091832  | 0.974095  |
| 19               | 8                | 0              | 0.722015                | 0.518666  | -0.363226 |
| 20               | 14               | 0              | 2.044755                | -0.473645 | 0.069216  |
| 21               | 6                | 0              | 1.737265                | -1.153954 | 1.776839  |
| 22               | 1                | 0              | 2.638252                | -1.643104 | 2.153918  |
| 23               | 1                | 0              | 1.480230                | -0.348669 | 2.468911  |
| 24               | 1                | 0              | 0.926608                | -1.882425 | 1.781584  |
| 25               | 6                | 0              | 2.246499                | -1.793502 | -1.227893 |
| 26               | 1                | 0              | 3.225073                | -2.265920 | -1.111283 |
| 27               | 1                | 0              | 1.482588                | -2.565881 | -1.158058 |
| 28               | 1                | 0              | 2.203640                | -1.357694 | -2.228061 |
| 29               | 6                | 0              | 3.562955                | 0.614901  | 0.079907  |
| 30               | 1                | 0              | 4.431271                | -0.005672 | 0.314690  |
| 31               | 1                | 0              | 3.737995                | 1.074878  | -0.894454 |
| 32               | 1                | 0              | 3.506611                | 1.404729  | 0.830442  |

-----  
<sup>a</sup> Atomic Units = Hartrees



### Computed energy and geometry of VIII

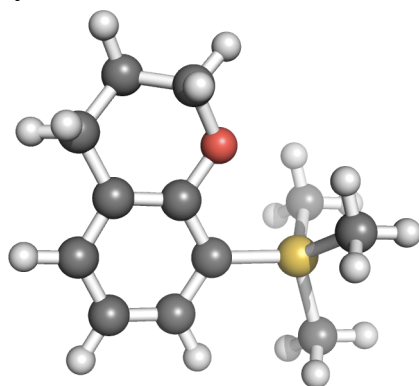

#### M06-2X/6-311G(d,p)

Sum of electronic and thermal Enthalpies = -832.488052 A.U.<sup>a</sup>

| Center Number | Atomic Number | Atomic Type | Coordinates (Angstroms) |           |           |
|---------------|---------------|-------------|-------------------------|-----------|-----------|
|               |               |             | X                       | Y         | Z         |
| 1             | 6             | 0           | 1.923479                | 2.128566  | 0.039610  |
| 2             | 6             | 0           | 0.718544                | 2.817778  | 0.024949  |
| 3             | 6             | 0           | -0.477693               | 2.101184  | 0.000102  |
| 4             | 6             | 0           | -0.489160               | 0.704618  | 0.001631  |
| 5             | 6             | 0           | 0.749460                | 0.041054  | 0.029747  |
| 6             | 6             | 0           | 1.966877                | 0.732995  | 0.040302  |
| 7             | 1             | 0           | 2.862506                | 2.674303  | 0.042600  |
| 8             | 1             | 0           | 0.708997                | 3.901553  | 0.024561  |
| 9             | 1             | 0           | -1.418040               | 2.643618  | -0.019386 |
| 10            | 6             | 0           | 3.284671                | -0.009791 | 0.027677  |
| 11            | 1             | 0           | 3.984664                | 0.505225  | -0.634174 |
| 12            | 1             | 0           | 3.722997                | 0.007594  | 1.031255  |
| 13            | 6             | 0           | 3.077008                | -1.457162 | -0.409174 |
| 14            | 1             | 0           | 2.869836                | -1.508072 | -1.482186 |
| 15            | 1             | 0           | 3.963712                | -2.060501 | -0.206421 |
| 16            | 6             | 0           | 1.892211                | -2.027091 | 0.345894  |
| 17            | 1             | 0           | 1.697315                | -3.066351 | 0.085298  |
| 18            | 1             | 0           | 2.059085                | -1.958742 | 1.427498  |
| 19            | 8             | 0           | 0.688693                | -1.323834 | 0.021946  |
| 20            | 14            | 0           | -2.098090               | -0.287974 | -0.020195 |
| 21            | 6             | 0           | -2.237768               | -1.323604 | 1.538912  |
| 22            | 1             | 0           | -3.190546               | -1.861854 | 1.559553  |
| 23            | 1             | 0           | -1.430380               | -2.058212 | 1.587801  |
| 24            | 1             | 0           | -2.185314               | -0.698782 | 2.435214  |
| 25            | 6             | 0           | -3.528827               | 0.926907  | -0.085368 |
| 26            | 1             | 0           | -4.473505               | 0.374021  | -0.105378 |
| 27            | 1             | 0           | -3.549963               | 1.584214  | 0.788665  |
| 28            | 1             | 0           | -3.493762               | 1.552345  | -0.982026 |

|    |   |   |           |           |           |
|----|---|---|-----------|-----------|-----------|
| 29 | 6 | 0 | -2.165015 | -1.392792 | -1.536617 |
| 30 | 1 | 0 | -3.115850 | -1.933437 | -1.575833 |
| 31 | 1 | 0 | -2.075964 | -0.805351 | -2.455213 |
| 32 | 1 | 0 | -1.354801 | -2.125226 | -1.520662 |

<sup>a</sup> Atomic Units = Hartrees

### M06-2X/6-31G(d)

Sum of electronic and thermal Enthalpies = -832.312045 A.U.<sup>a</sup>

| Center<br>Number | Atomic<br>Number | Atomic<br>Type | Coordinates (Angstroms) |           |           |
|------------------|------------------|----------------|-------------------------|-----------|-----------|
|                  |                  |                | X                       | Y         | Z         |
| 1                | 6                | 0              | -1.927298               | -2.129796 | 0.039409  |
| 2                | 6                | 0              | -0.720668               | -2.819736 | 0.024371  |
| 3                | 6                | 0              | 0.475940                | -2.101057 | -0.000436 |
| 4                | 6                | 0              | 0.488262                | -0.702764 | 0.002422  |
| 5                | 6                | 0              | -0.752558               | -0.040350 | 0.031824  |
| 6                | 6                | 0              | -1.971473               | -0.732804 | 0.041314  |
| 7                | 1                | 0              | -2.867943               | -2.676812 | 0.041680  |
| 8                | 1                | 0              | -0.710754               | -3.905491 | 0.023065  |
| 9                | 1                | 0              | 1.418576                | -2.643710 | -0.021009 |
| 10               | 6                | 0              | -3.289131               | 0.011085  | 0.028037  |
| 11               | 1                | 0              | -3.993456               | -0.503567 | -0.633732 |
| 12               | 1                | 0              | -3.731882               | -0.003581 | 1.032285  |
| 13               | 6                | 0              | -3.080059               | 1.458386  | -0.410732 |
| 14               | 1                | 0              | -2.872039               | 1.508664  | -1.485660 |
| 15               | 1                | 0              | -3.968748               | 2.063670  | -0.210290 |
| 16               | 6                | 0              | -1.894166               | 2.028421  | 0.345108  |
| 17               | 1                | 0              | -1.697586               | 3.069613  | 0.082960  |
| 18               | 1                | 0              | -2.064710               | 1.965213  | 1.428677  |
| 19               | 8                | 0              | -0.691518               | 1.326104  | 0.025402  |
| 20               | 14               | 0              | 2.097539                | 0.286993  | -0.020504 |
| 21               | 6                | 0              | 2.254058                | 1.313382  | 1.548357  |
| 22               | 1                | 0              | 3.198346                | 1.870709  | 1.552881  |
| 23               | 1                | 0              | 1.434071                | 2.034054  | 1.628216  |
| 24               | 1                | 0              | 2.236888                | 0.679419  | 2.442084  |
| 25               | 6                | 0              | 3.531482                | -0.930588 | -0.098582 |
| 26               | 1                | 0              | 4.479106                | -0.378902 | -0.119586 |
| 27               | 1                | 0              | 3.557950                | -1.594687 | 0.772703  |
| 28               | 1                | 0              | 3.494725                | -1.553843 | -0.999118 |
| 29               | 6                | 0              | 2.167892                | 1.402517  | -1.534660 |
| 30               | 1                | 0              | 3.118081                | 1.948760  | -1.566743 |
| 31               | 1                | 0              | 2.088218                | 0.819681  | -2.459412 |

32                    1                    0                    1.354079                    2.133894                    -1.523739

-----  
<sup>a</sup> Atomic Units = Hartrees

### M06-2X/ccpVTZ

Sum of electronic and thermal Enthalpies = -832.550958 A.U.<sup>a</sup>

| Center<br>Number | Atomic<br>Number | Atomic<br>Type | Coordinates (Angstroms) |           |           |
|------------------|------------------|----------------|-------------------------|-----------|-----------|
|                  |                  |                | X                       | Y         | Z         |
| 1                | 6                | 0              | 1.916361                | 2.125432  | 0.039306  |
| 2                | 6                | 0              | 0.711822                | 2.808868  | 0.021628  |
| 3                | 6                | 0              | -0.478484               | 2.088731  | -0.003861 |
| 4                | 6                | 0              | -0.486074               | 0.695371  | -0.001117 |
| 5                | 6                | 0              | 0.752648                | 0.038317  | 0.028825  |
| 6                | 6                | 0              | 1.964953                | 0.733351  | 0.041640  |
| 7                | 1                | 0              | 2.851791                | 2.673597  | 0.043209  |
| 8                | 1                | 0              | 0.698043                | 3.890700  | 0.020012  |
| 9                | 1                | 0              | -1.418936               | 2.626853  | -0.025248 |
| 10               | 6                | 0              | 3.283066                | -0.002000 | 0.033140  |
| 11               | 1                | 0              | 3.984076                | 0.519072  | -0.619332 |
| 12               | 1                | 0              | 3.715212                | 0.012831  | 1.037240  |
| 13               | 6                | 0              | 3.086043                | -1.445531 | -0.409265 |
| 14               | 1                | 0              | 2.883552                | -1.493588 | -1.481291 |
| 15               | 1                | 0              | 3.973673                | -2.043849 | -0.207041 |
| 16               | 6                | 0              | 1.905389                | -2.023779 | 0.339045  |
| 17               | 1                | 0              | 1.717302                | -3.061396 | 0.073406  |
| 18               | 1                | 0              | 2.072462                | -1.963013 | 1.419293  |
| 19               | 8                | 0              | 0.700322                | -1.325550 | 0.021363  |
| 20               | 14               | 0              | -2.098624               | -0.289372 | -0.019659 |
| 21               | 6                | 0              | -2.253119               | -1.306468 | 1.548500  |
| 22               | 1                | 0              | -3.201835               | -1.848071 | 1.558980  |
| 23               | 1                | 0              | -1.444852               | -2.034900 | 1.622333  |
| 24               | 1                | 0              | -2.220506               | -0.669380 | 2.434551  |
| 25               | 6                | 0              | -3.520345               | 0.932511  | -0.098983 |
| 26               | 1                | 0              | -4.465854               | 0.385122  | -0.116066 |
| 27               | 1                | 0              | -3.537708               | 1.596315  | 0.767474  |
| 28               | 1                | 0              | -3.477627               | 1.547467  | -0.999955 |
| 29               | 6                | 0              | -2.175553               | -1.406738 | -1.524745 |
| 30               | 1                | 0              | -3.133063               | -1.931617 | -1.558118 |
| 31               | 1                | 0              | -2.079137               | -0.828546 | -2.446003 |
| 32               | 1                | 0              | -1.378669               | -2.150373 | -1.503802 |

-----  
<sup>a</sup> Atomic Units = Hartrees

#### IV. Reference for Supplementary Information

---

- <sup>1</sup> T. R. Hoye, B. Baire, D. Niu, P. H. Willoughby and B. P. Woods, The hexadehydro-Diels–Alder reaction. *Nature* 2012, **490**, 208–212.
- <sup>2</sup> W. Oppolzer, A. Pimm, B. Stammen and W. E. Hume, Palladium-catalyzed intramolecular cyclizations of olefinic propargylic carbonates and application to the diastereoselective synthesis of enantiomerically pure (-)- $\alpha$ -thujone. *Helv. Chim. Acta.* 1997, **80**, 623–639.
- <sup>3</sup> J. M. Montierth, D. R. DeMario, M. J. Kurth and N. E. Schore, The polymer-supported Cadiot-Chodkiewicz coupling of acetylenes to produce unsymmetrical diynes. *Tetrahedron* 1998, **54**, 11741–11748.
- <sup>4</sup> G. Sabitha, C. S. Reddy, P. Srihari, and J. S. Yadav, Stereoselective total synthesis of (+)-virolo C. *Synthesis* 2003, **17**, 2699–2704.
- <sup>5</sup> M. J. Frisch, G. W. Trucks, H. B. Schlegel, G. E. Scuseria, M. A. Robb, J. R. Cheeseman, G. Scalmani, V. Barone, B. Mennucci, G. A. Petersson, H. Nakatsuji, M. Caricato, X. Li, H. P. Hratchian, A. F. Izmaylov, J. Bloino, G. Zheng, J. L. Sonnenberg, M. Hada, M. Ehara, K. Toyota, R. Fukuda, J. Hasegawa, M. Ishida, T. Nakajima, Y. Honda, O. Kitao, H. Nakai, T. Vreven, J. A. Montgomery, Jr., J. E. Peralta, F. Ogliaro, M. Bearpark, J. J. Heyd, E. Brothers, K. N. Kudin, V. N. Staroverov, R. Kobayashi, J. Normand, K. Raghavachari, A. Rendell, J. C. Burant, S. S. Iyengar, J. Tomasi, M. Cossi, N. Rega, J. M. Millam, M. Klene, J. E. Knox, J. B. Cross, V. Bakken, C. Adamo, J. Jaramillo, R. Gomperts, R. E. Stratmann, O. Yazyev, A. J. Austin, R. Cammi, C. Pomelli, J. W. Ochterski, R. L. Martin, K. Morokuma, V. G. Zakrzewski, G. A. Voth, P. Salvador, J. J. Dannenberg, S. Dapprich, A. D. Daniels, Ö. Farkas, J. B. Foresman, J. V. Ortiz, J. Cioslowski, and D. J. Fox, Gaussian, Inc., Wallingford CT, 2009.
- <sup>6</sup> Y. Zhao and D. G. Truhlar, The M06 suite of density functionals for main group thermochemistry, thermochemical kinetics, noncovalent interactions, excited states, and transition elements: two new functionals and systematic testing of four M06-class functionals and 12 other functionals. *Theor. Chem. Acc.* 2008, **120**, 215–241.
- <sup>7</sup> A. V. Marenich, R. M. Olson, C. P. Kelly, C. J. Cramer and D. G. Truhlar, Self-Consistent Reaction Field Model for Aqueous and Nonaqueous Solutions Based on Accurate Polarized Partial Charges. *J. Chem. Theory Comput.*, 2007, **3**, 2011–2033.

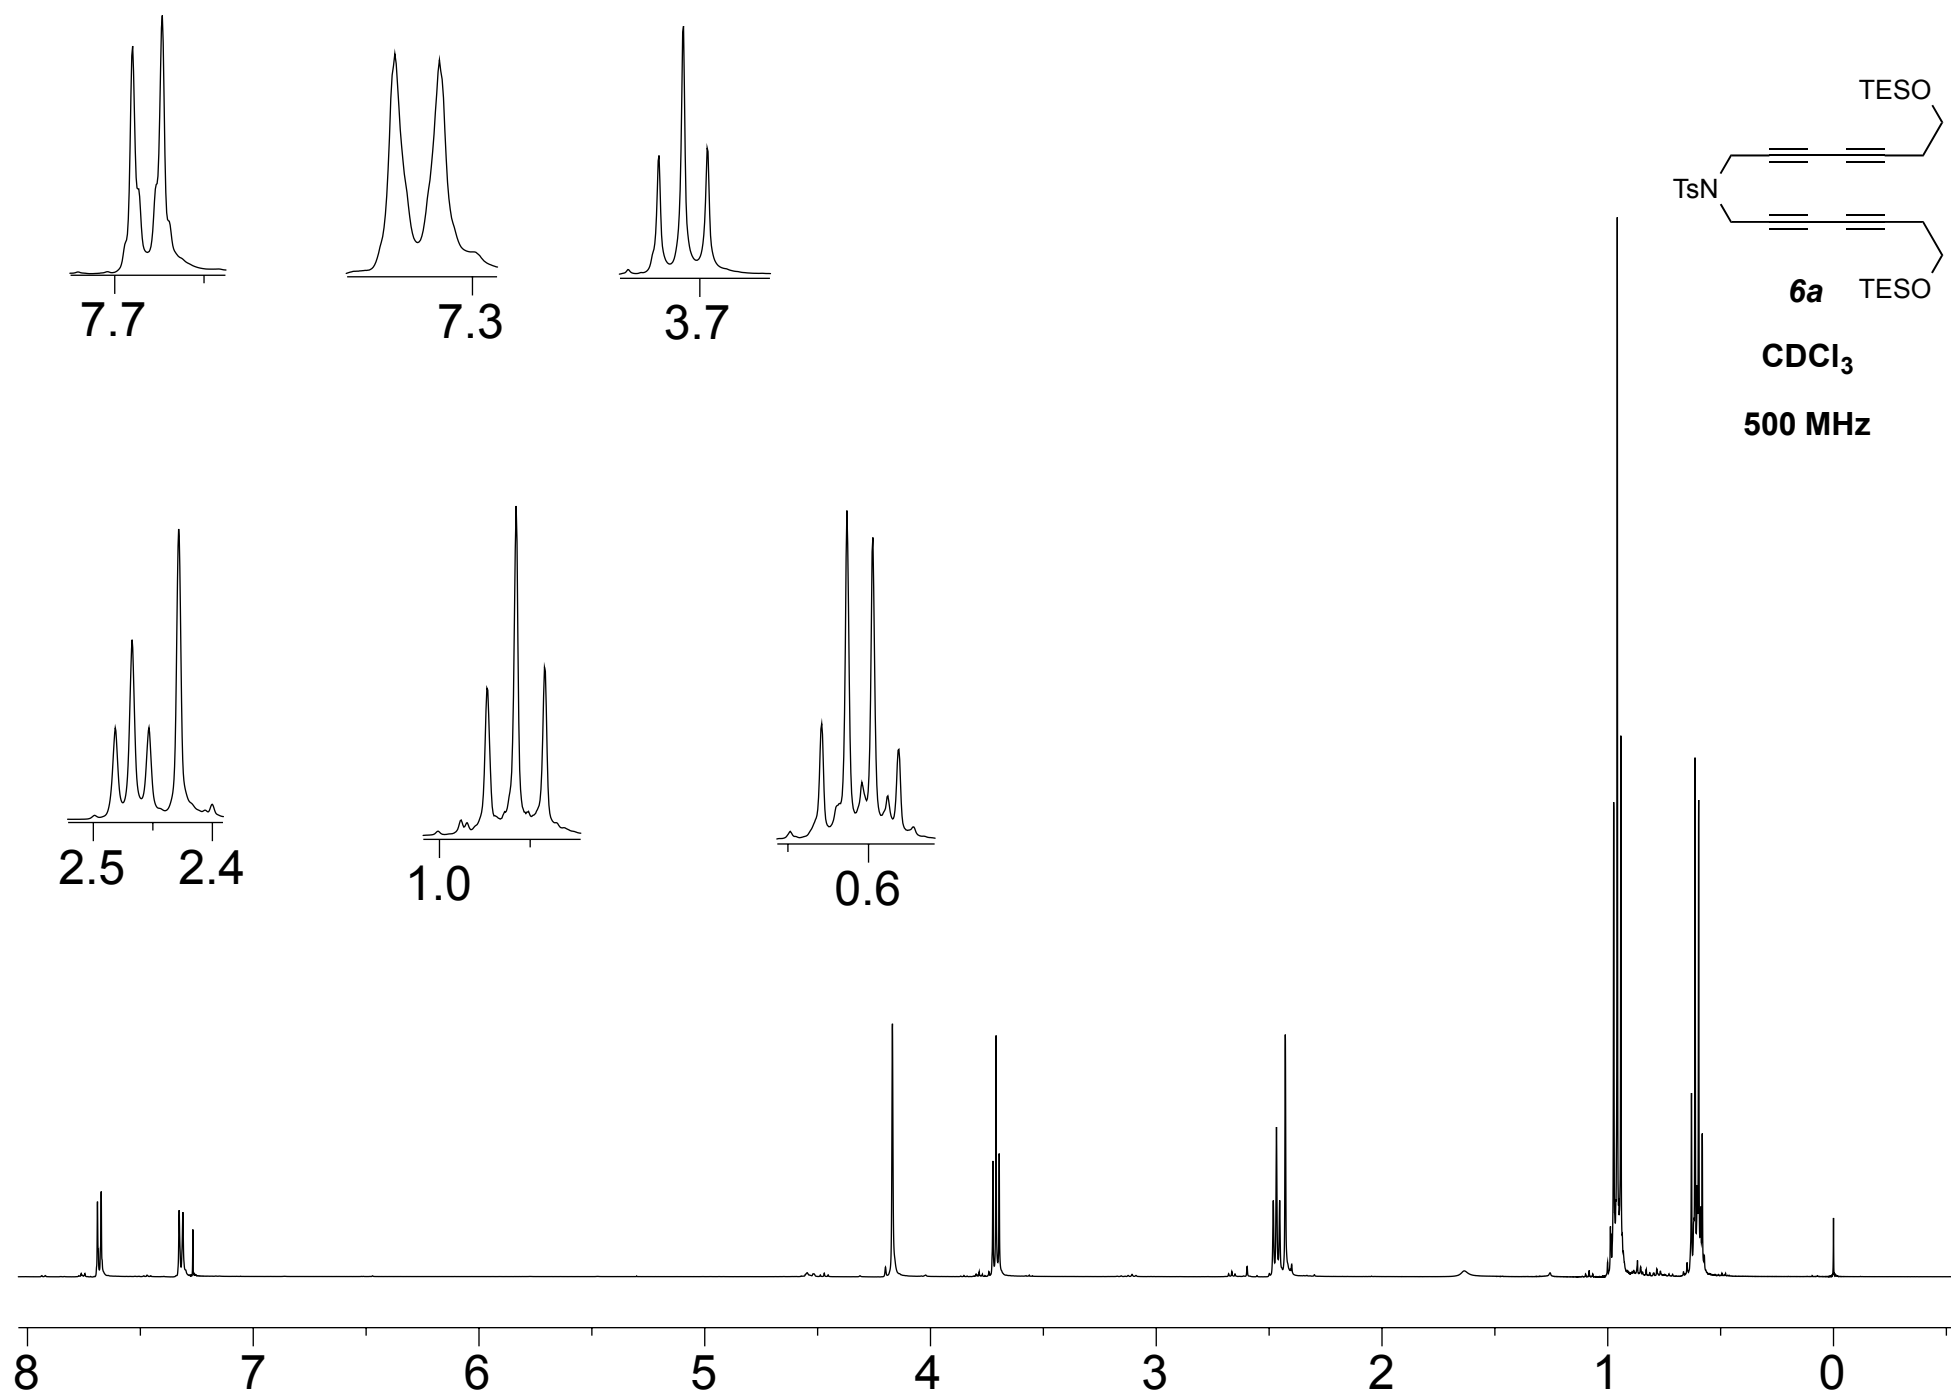

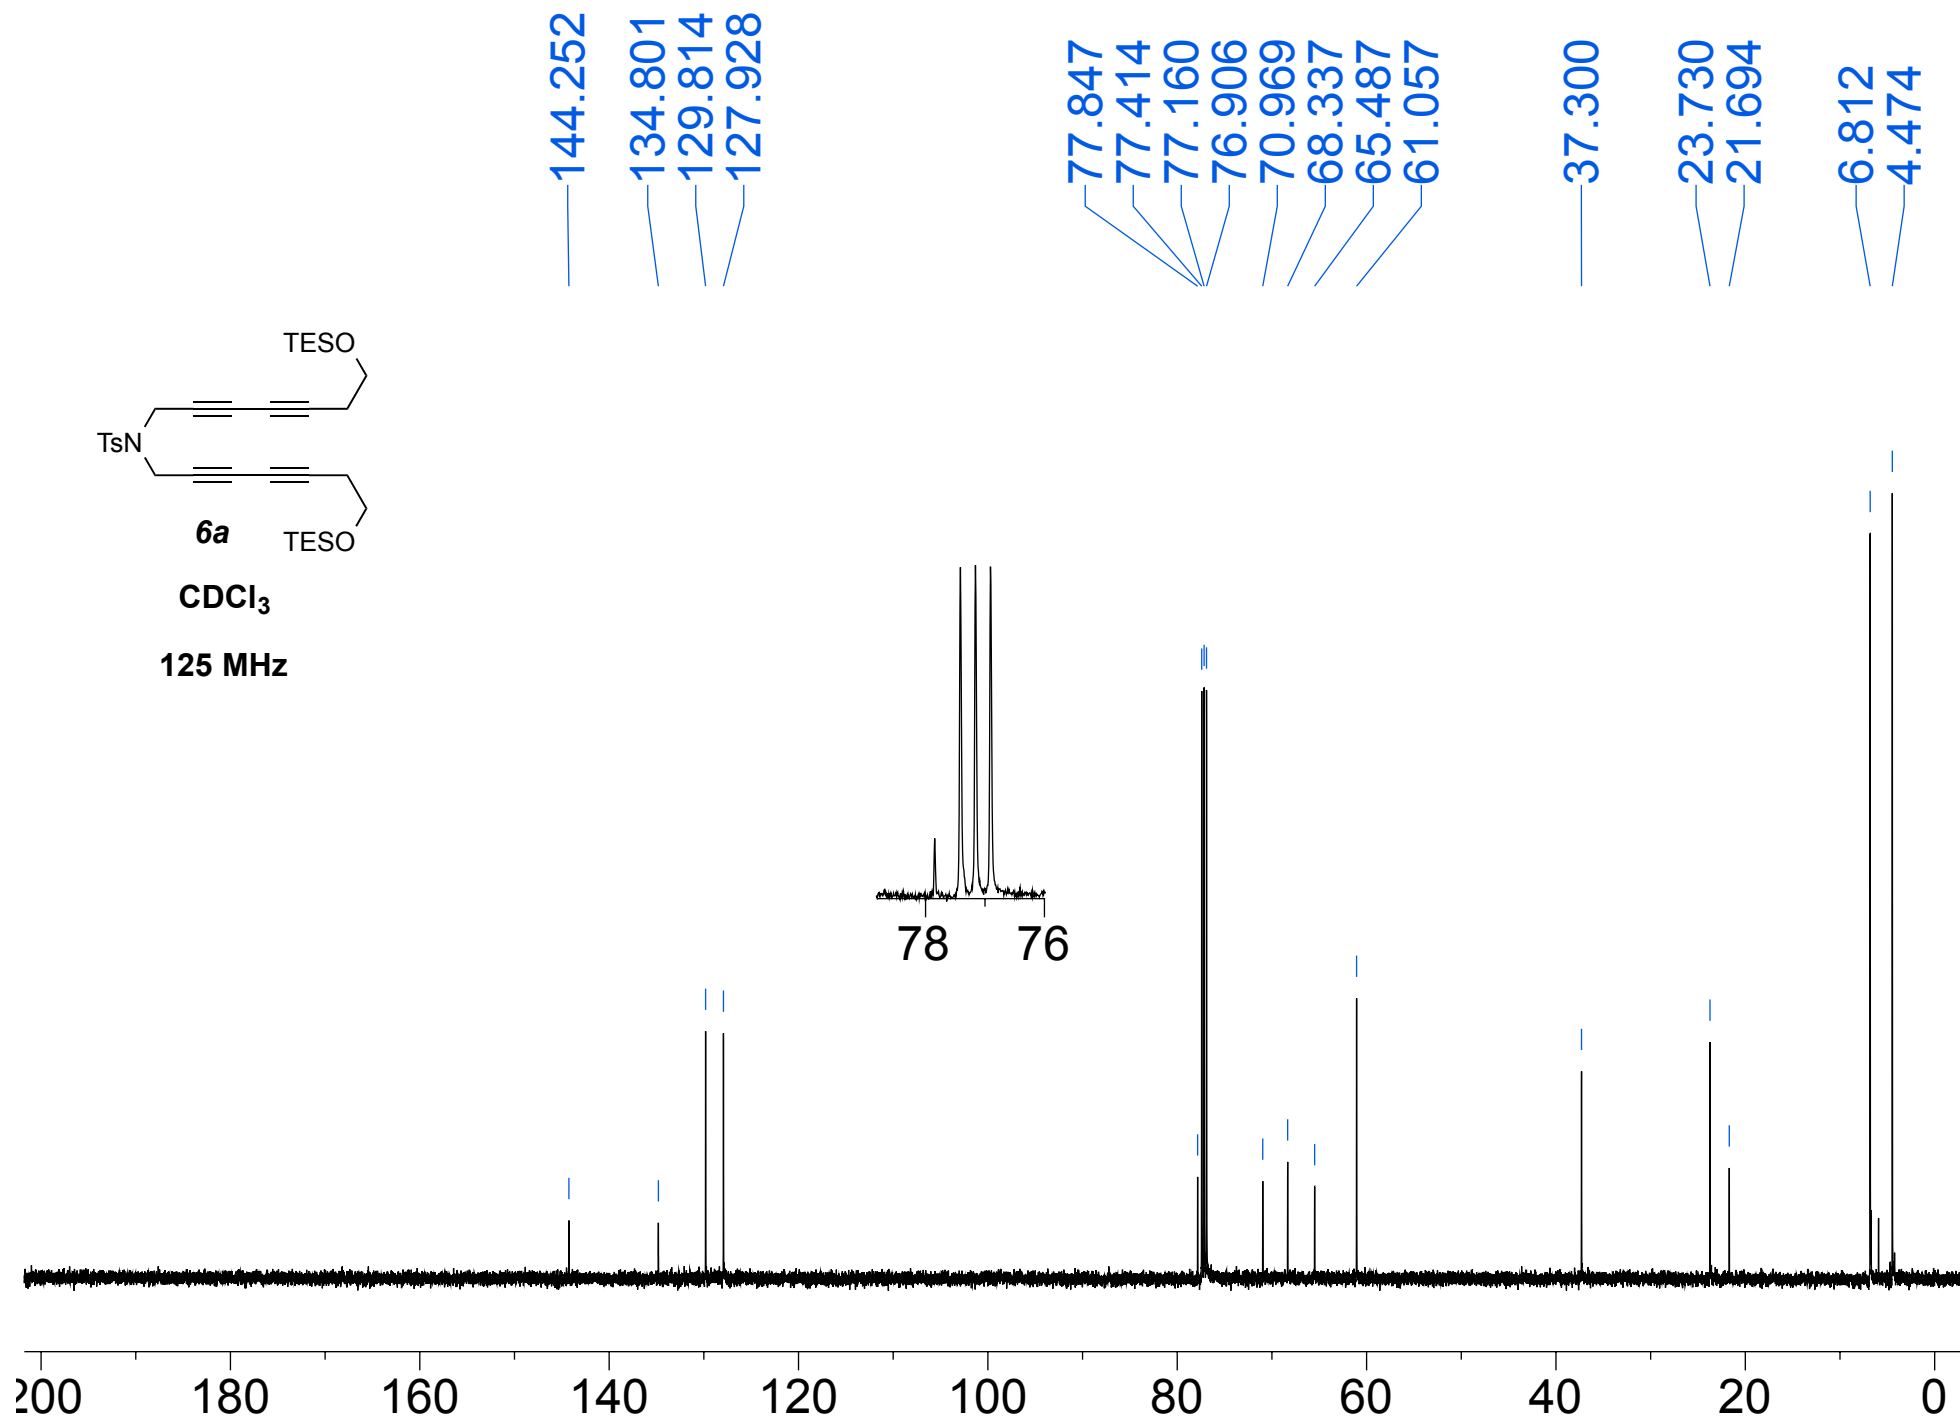

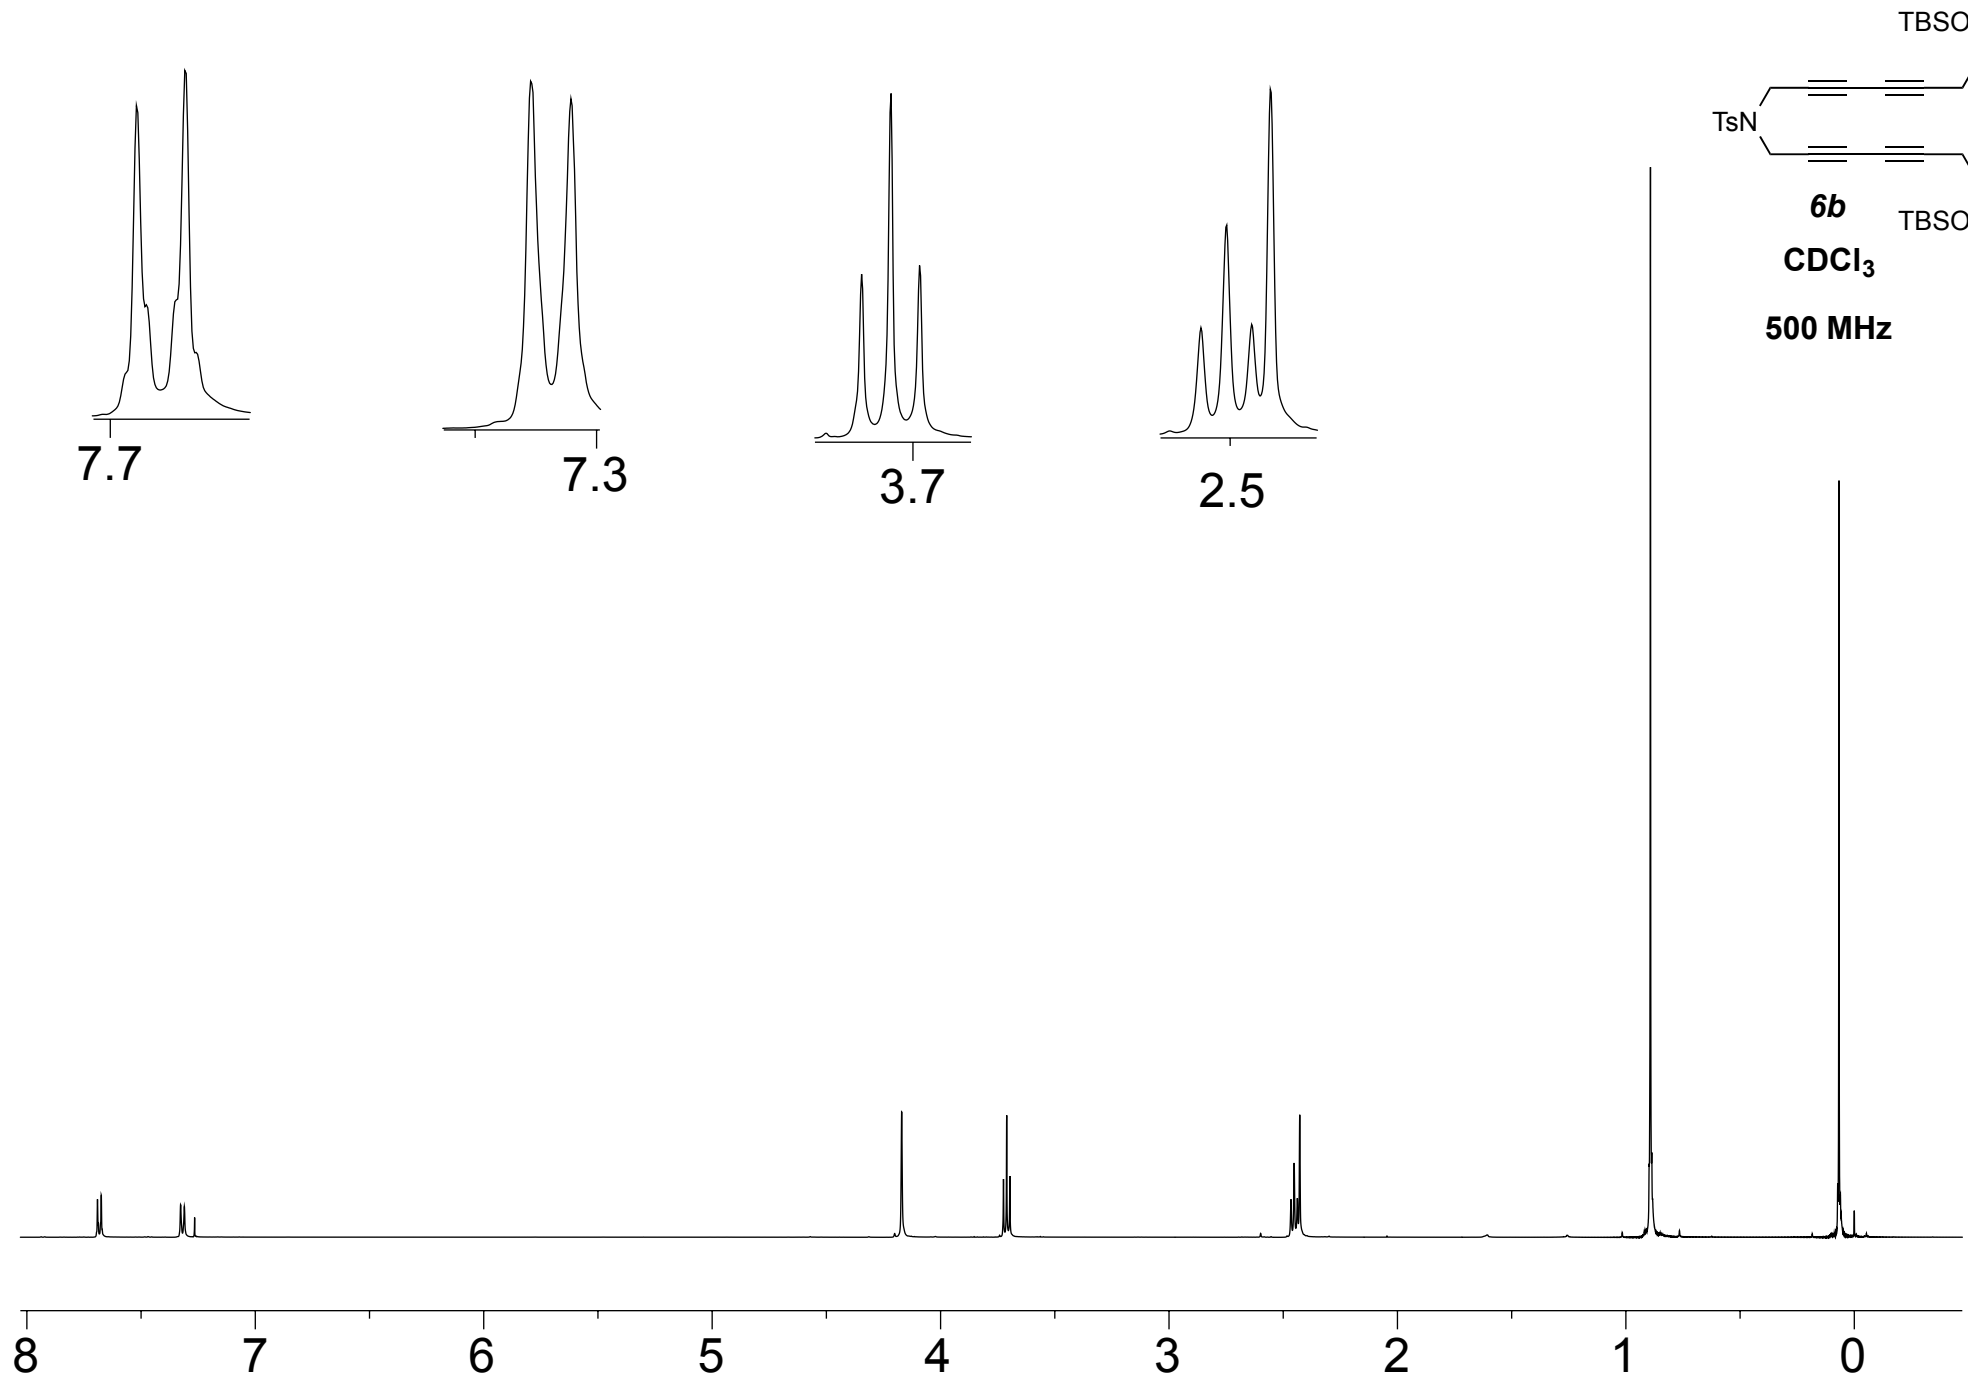





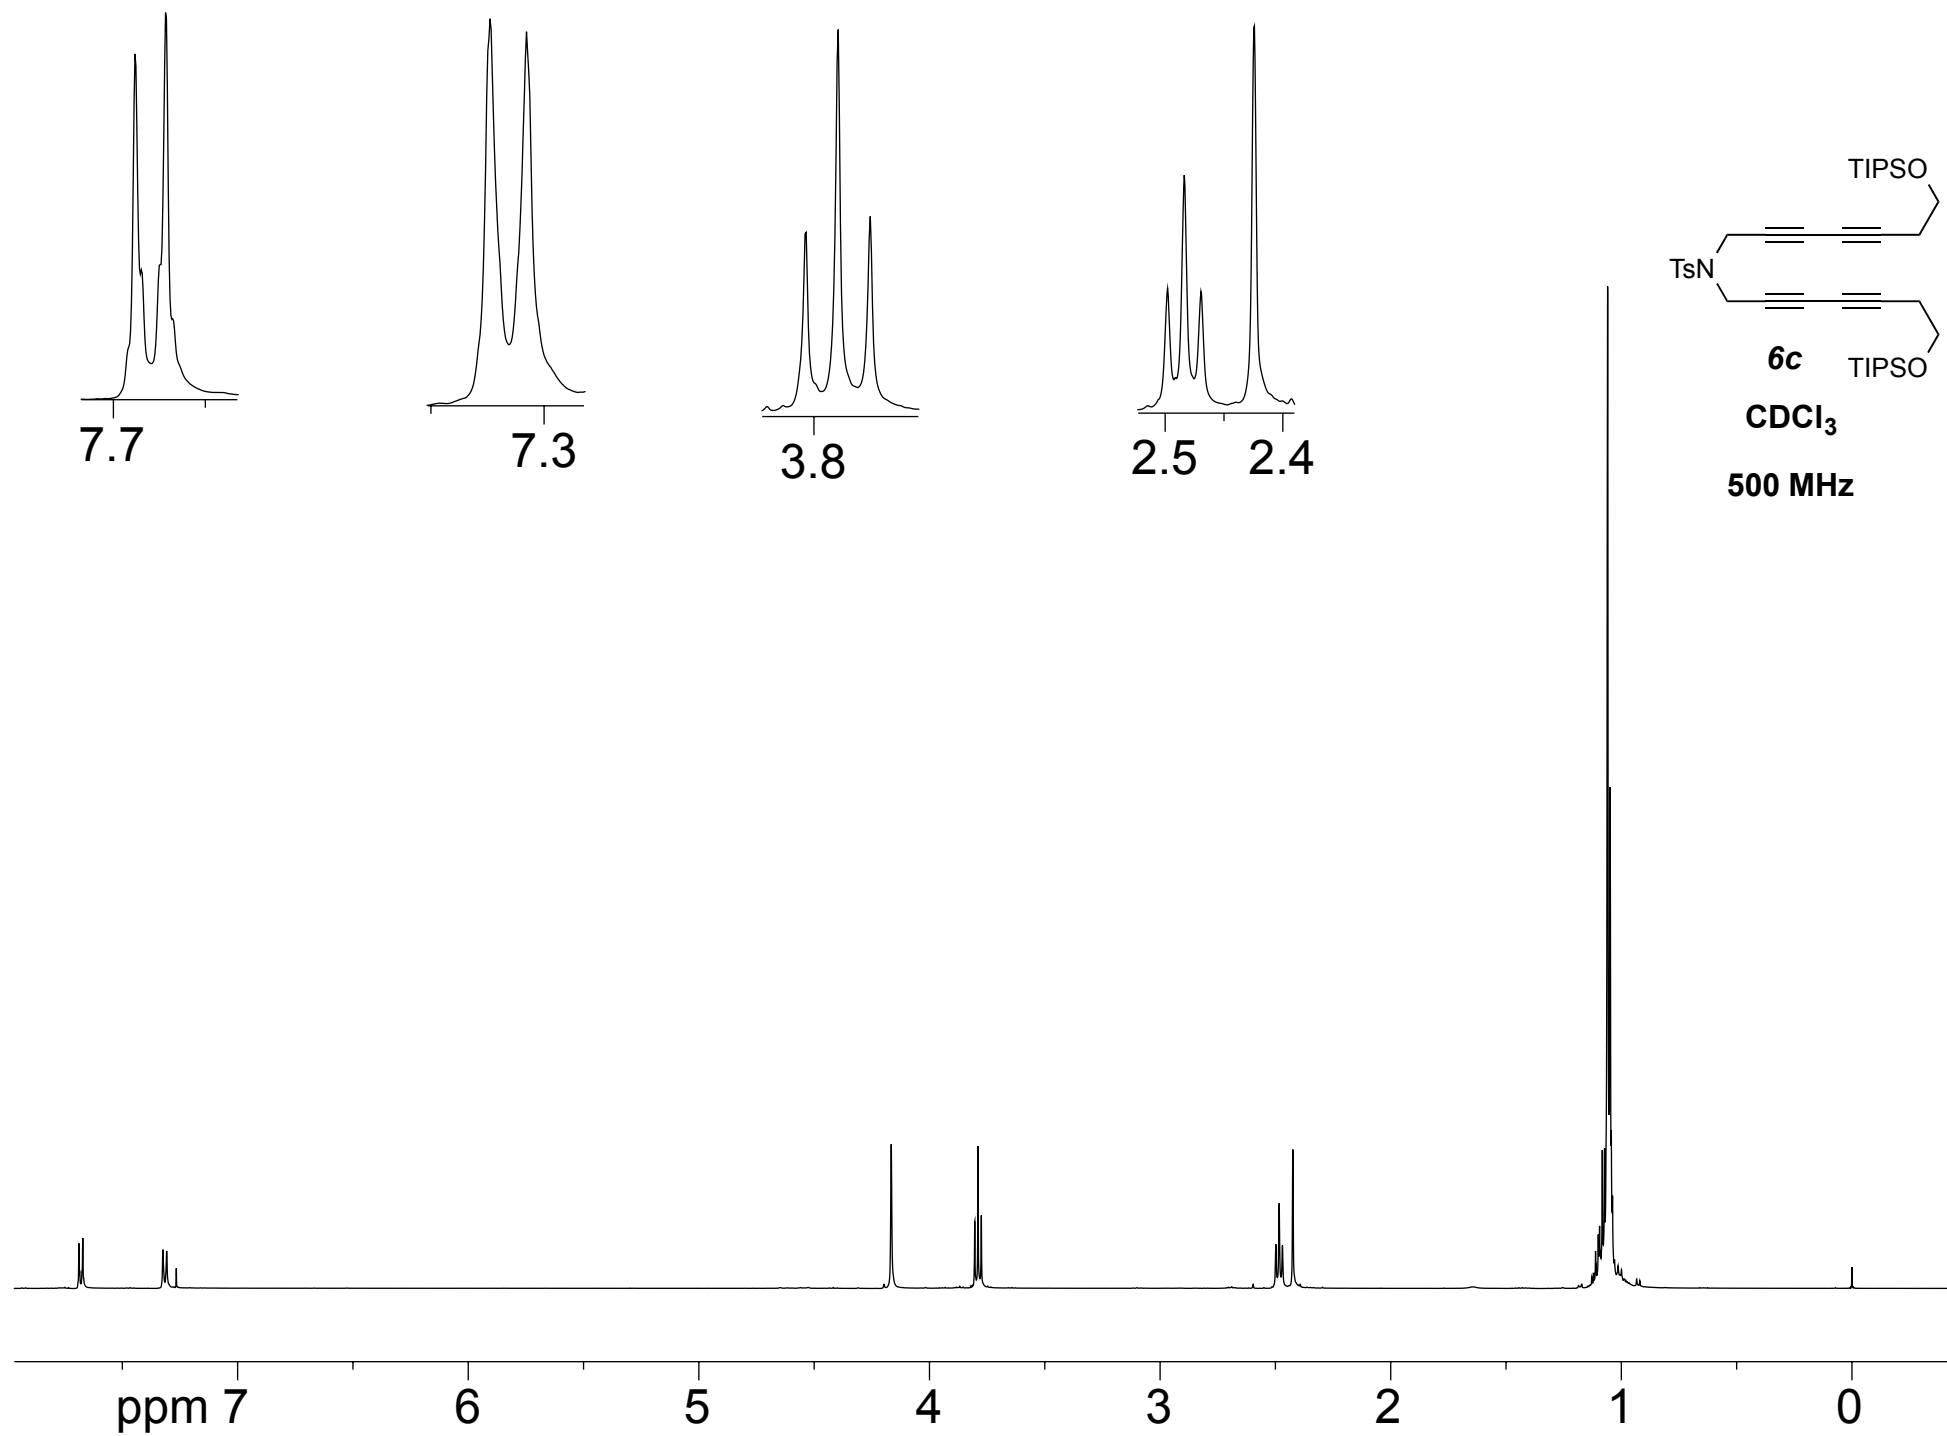

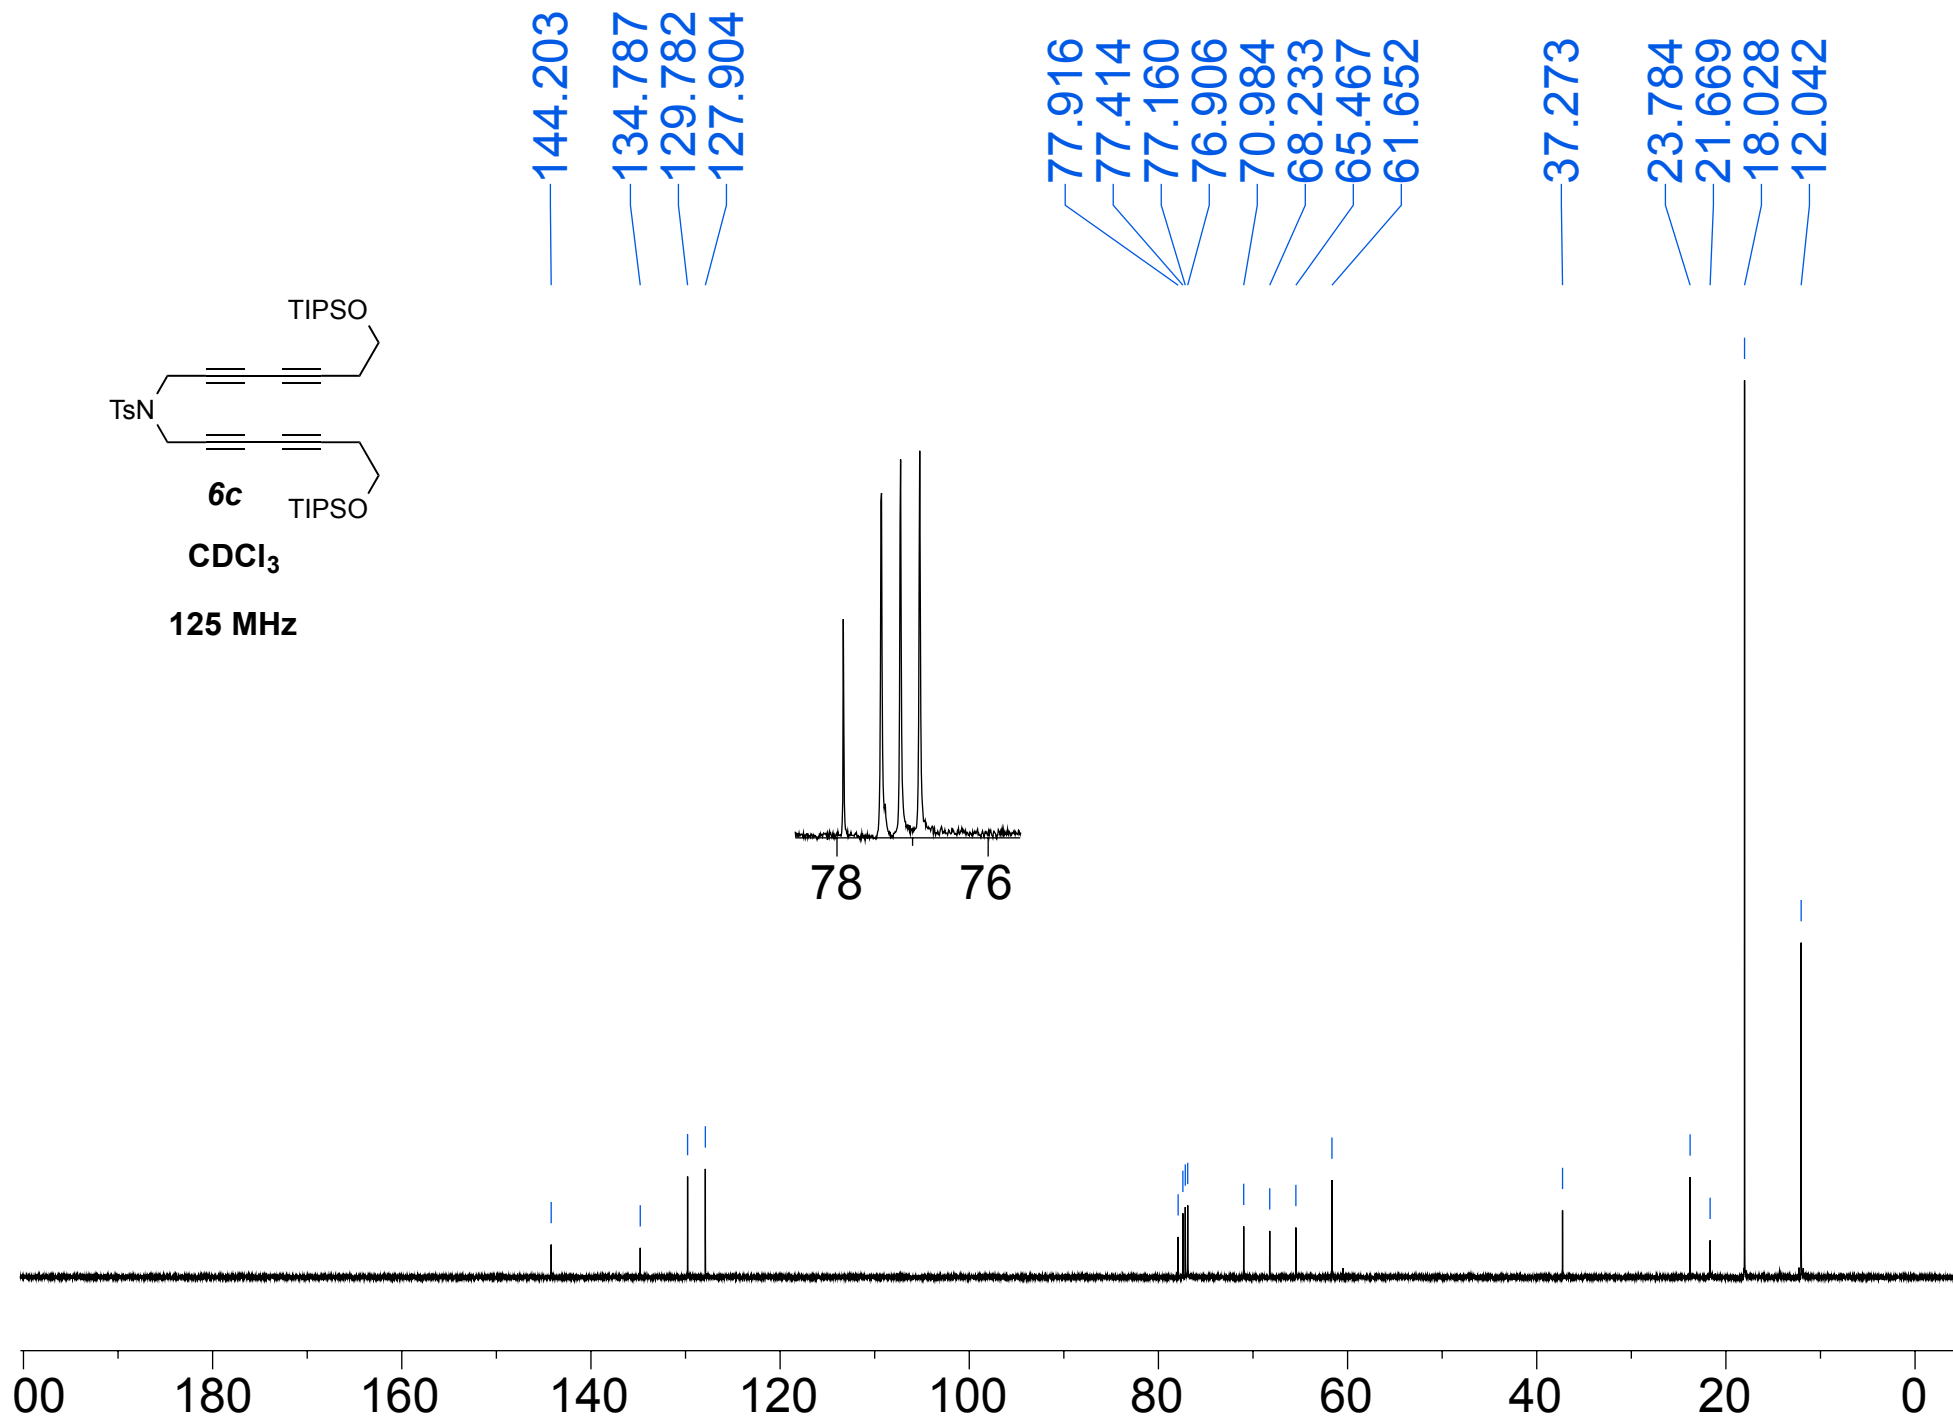

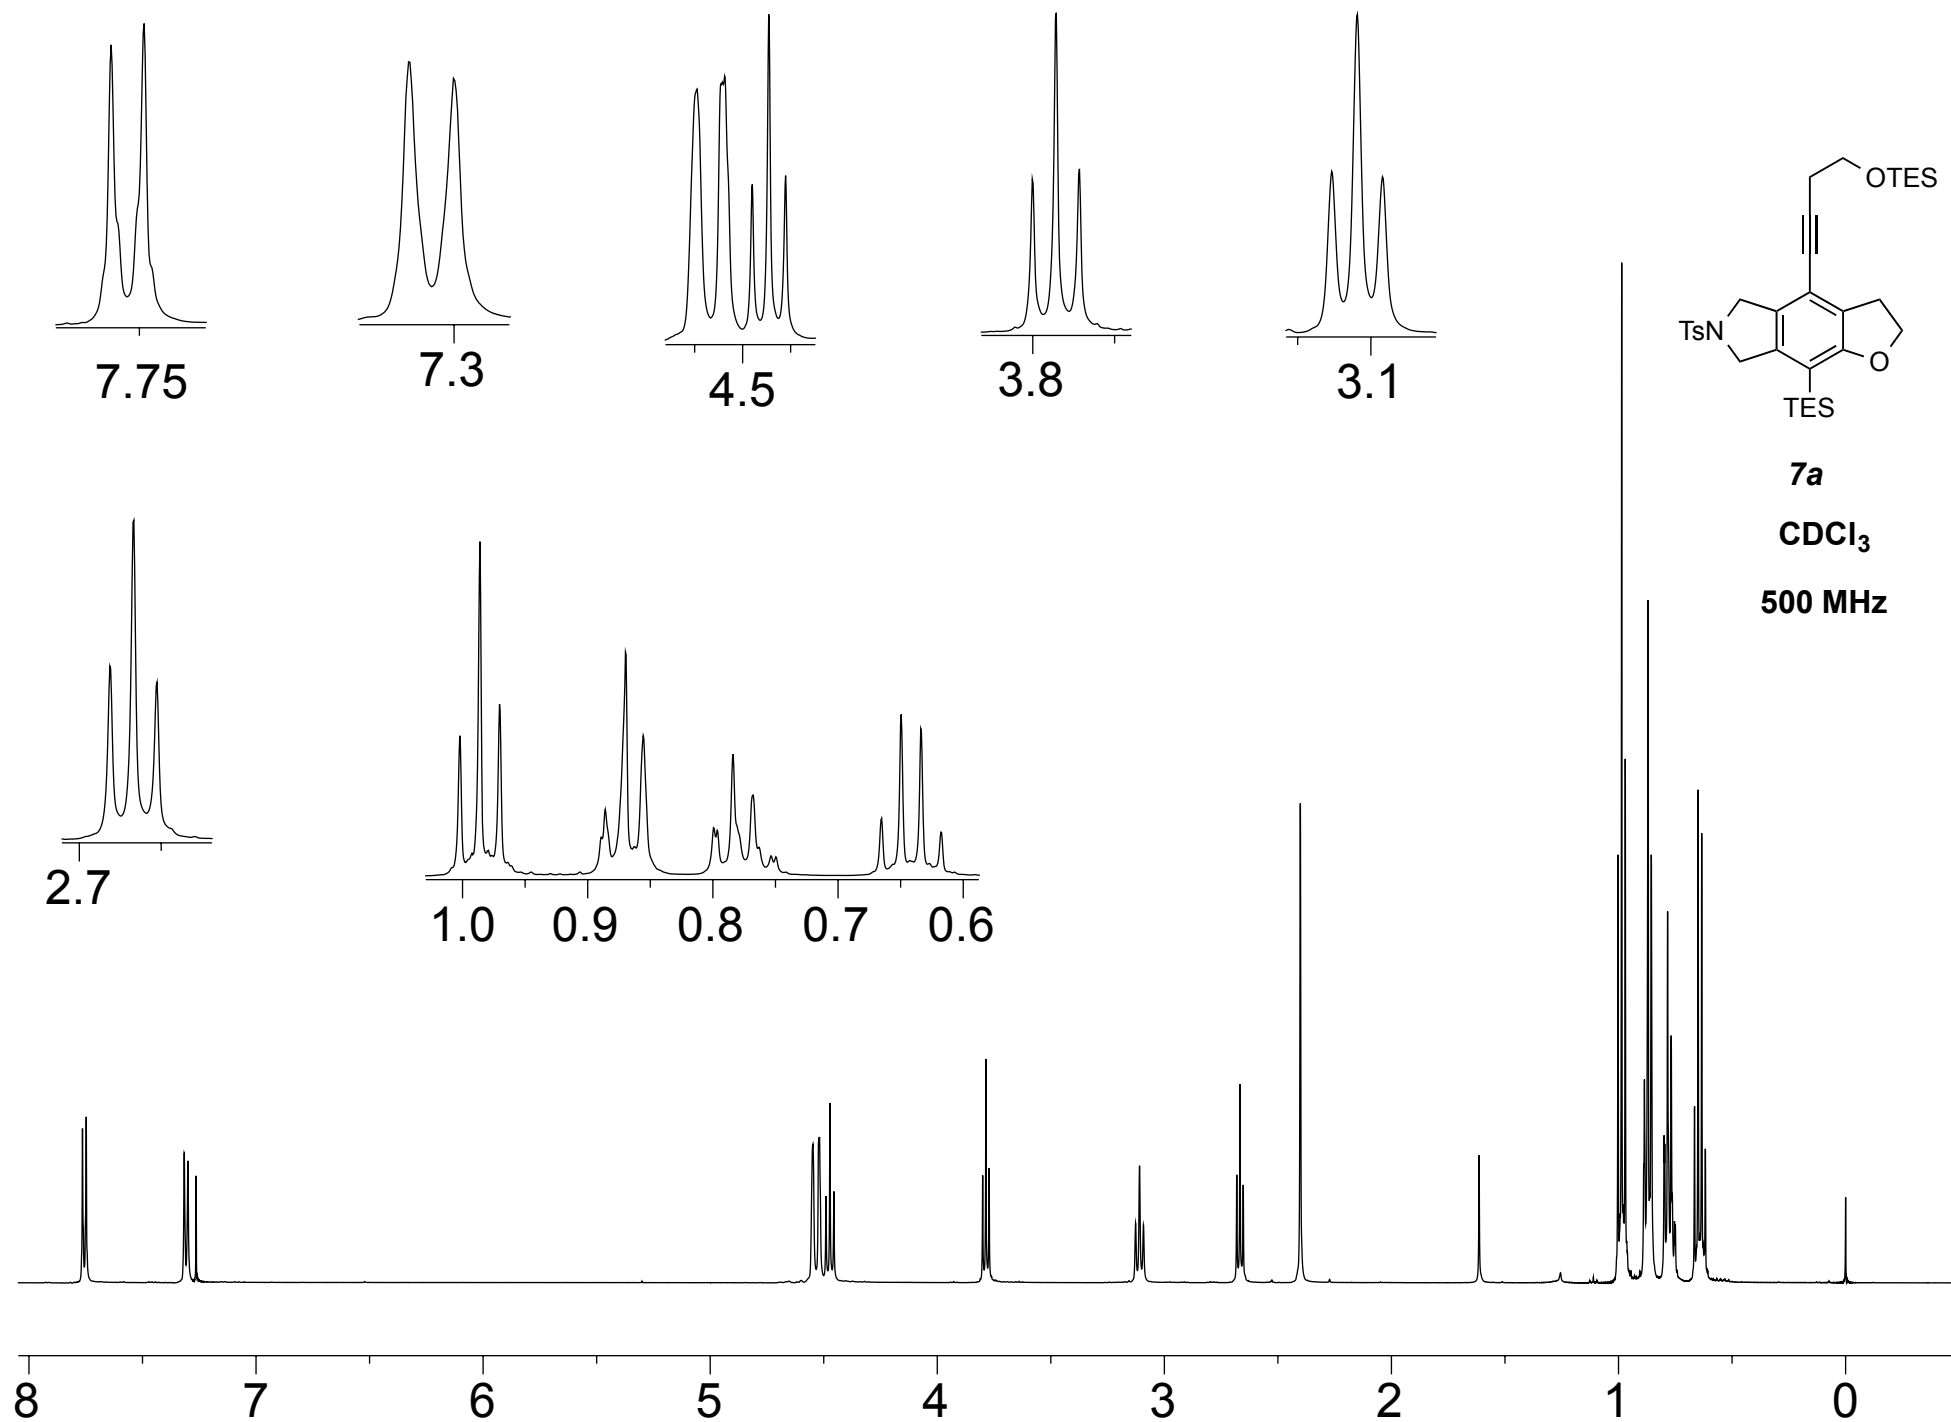

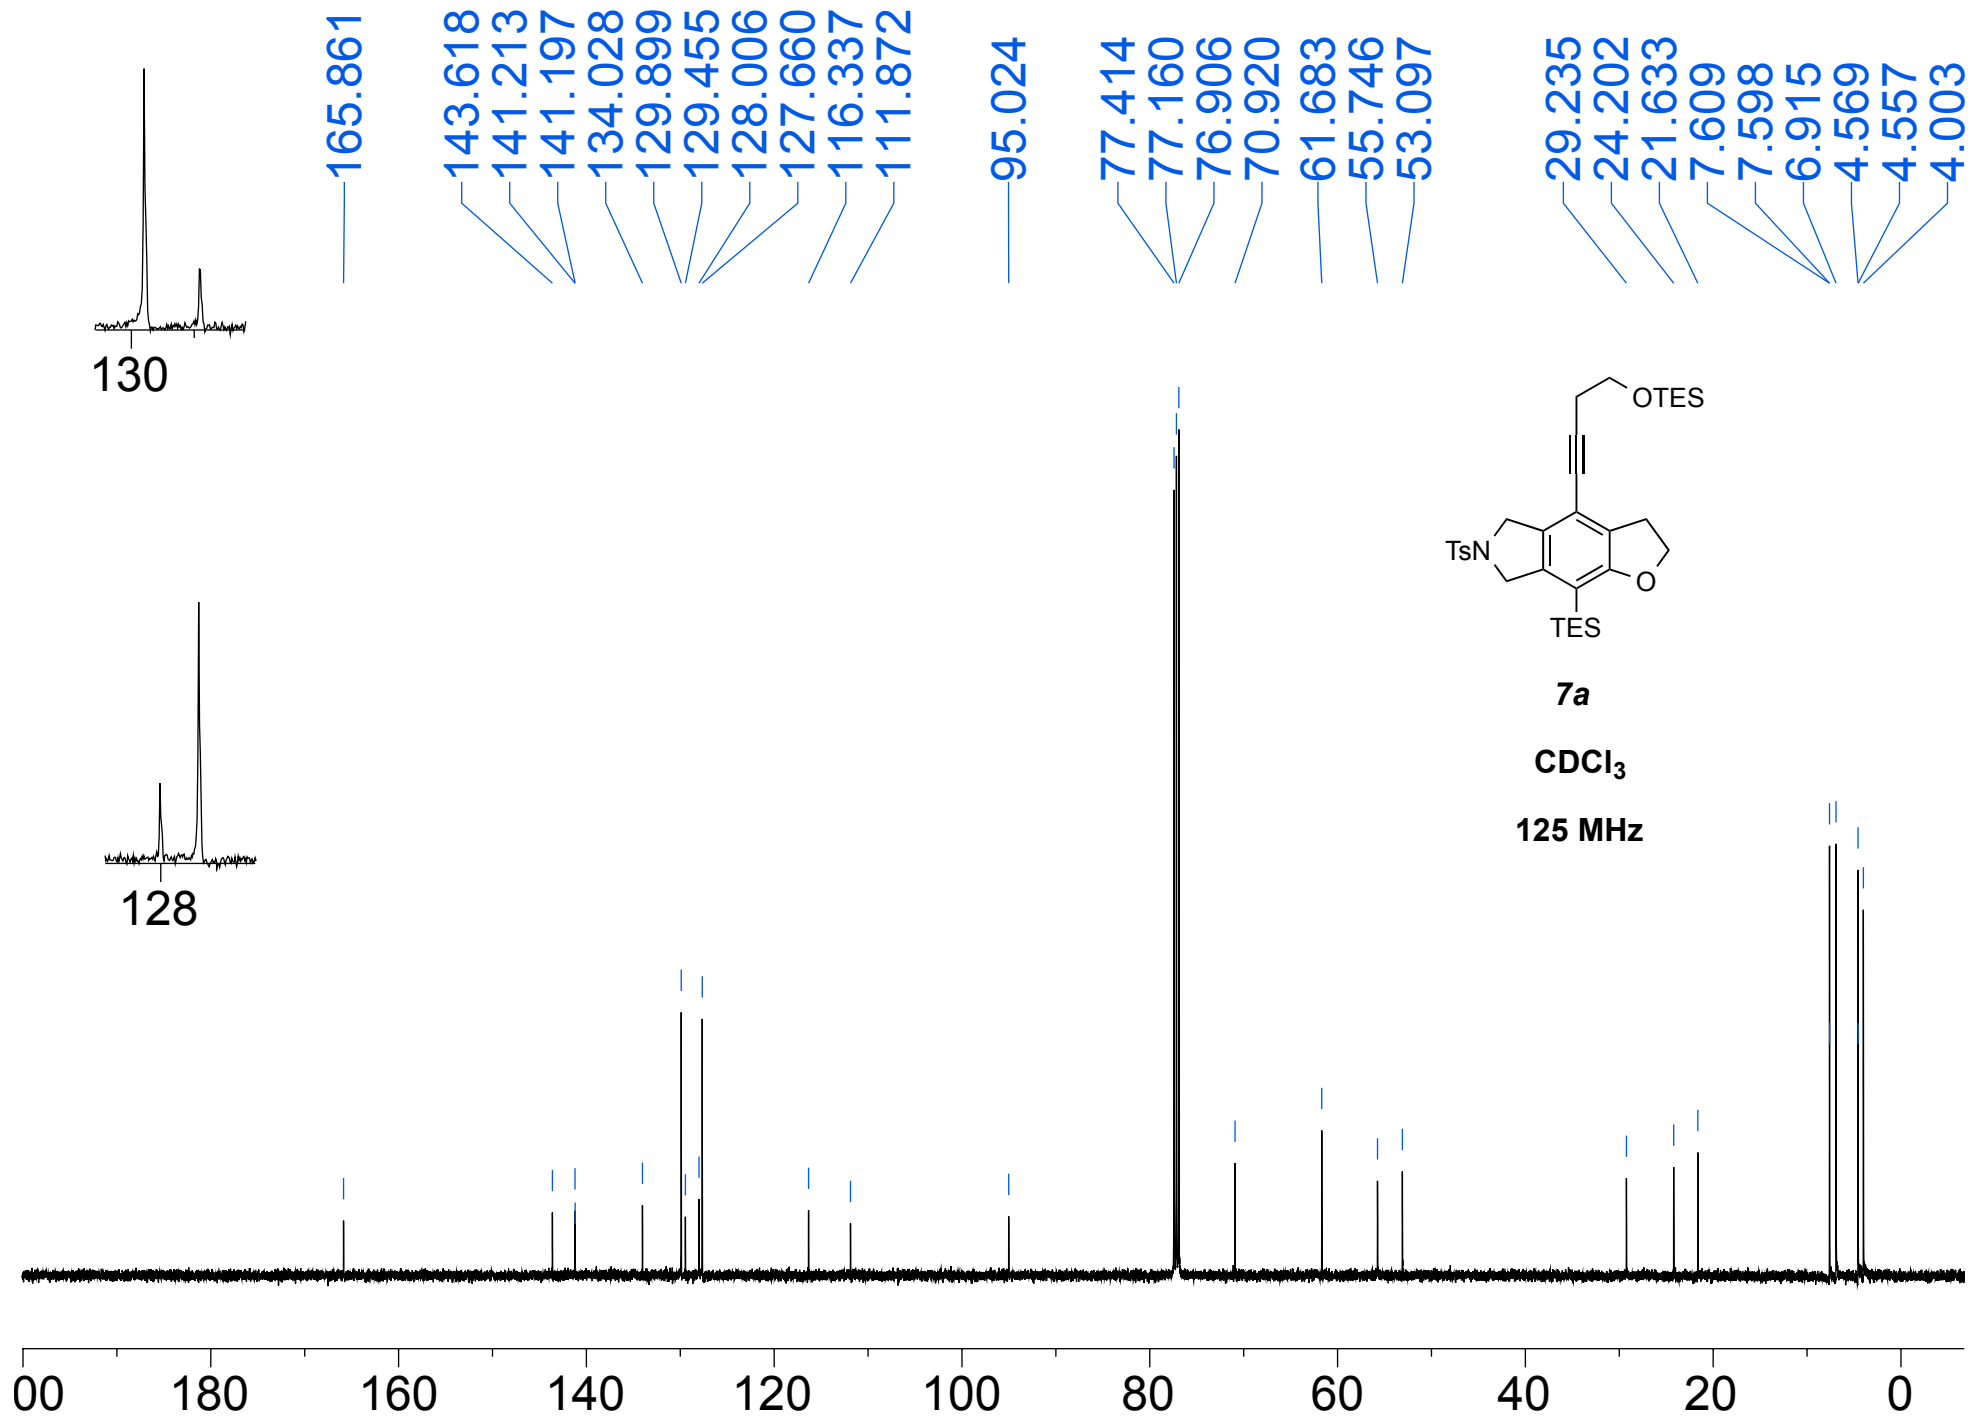

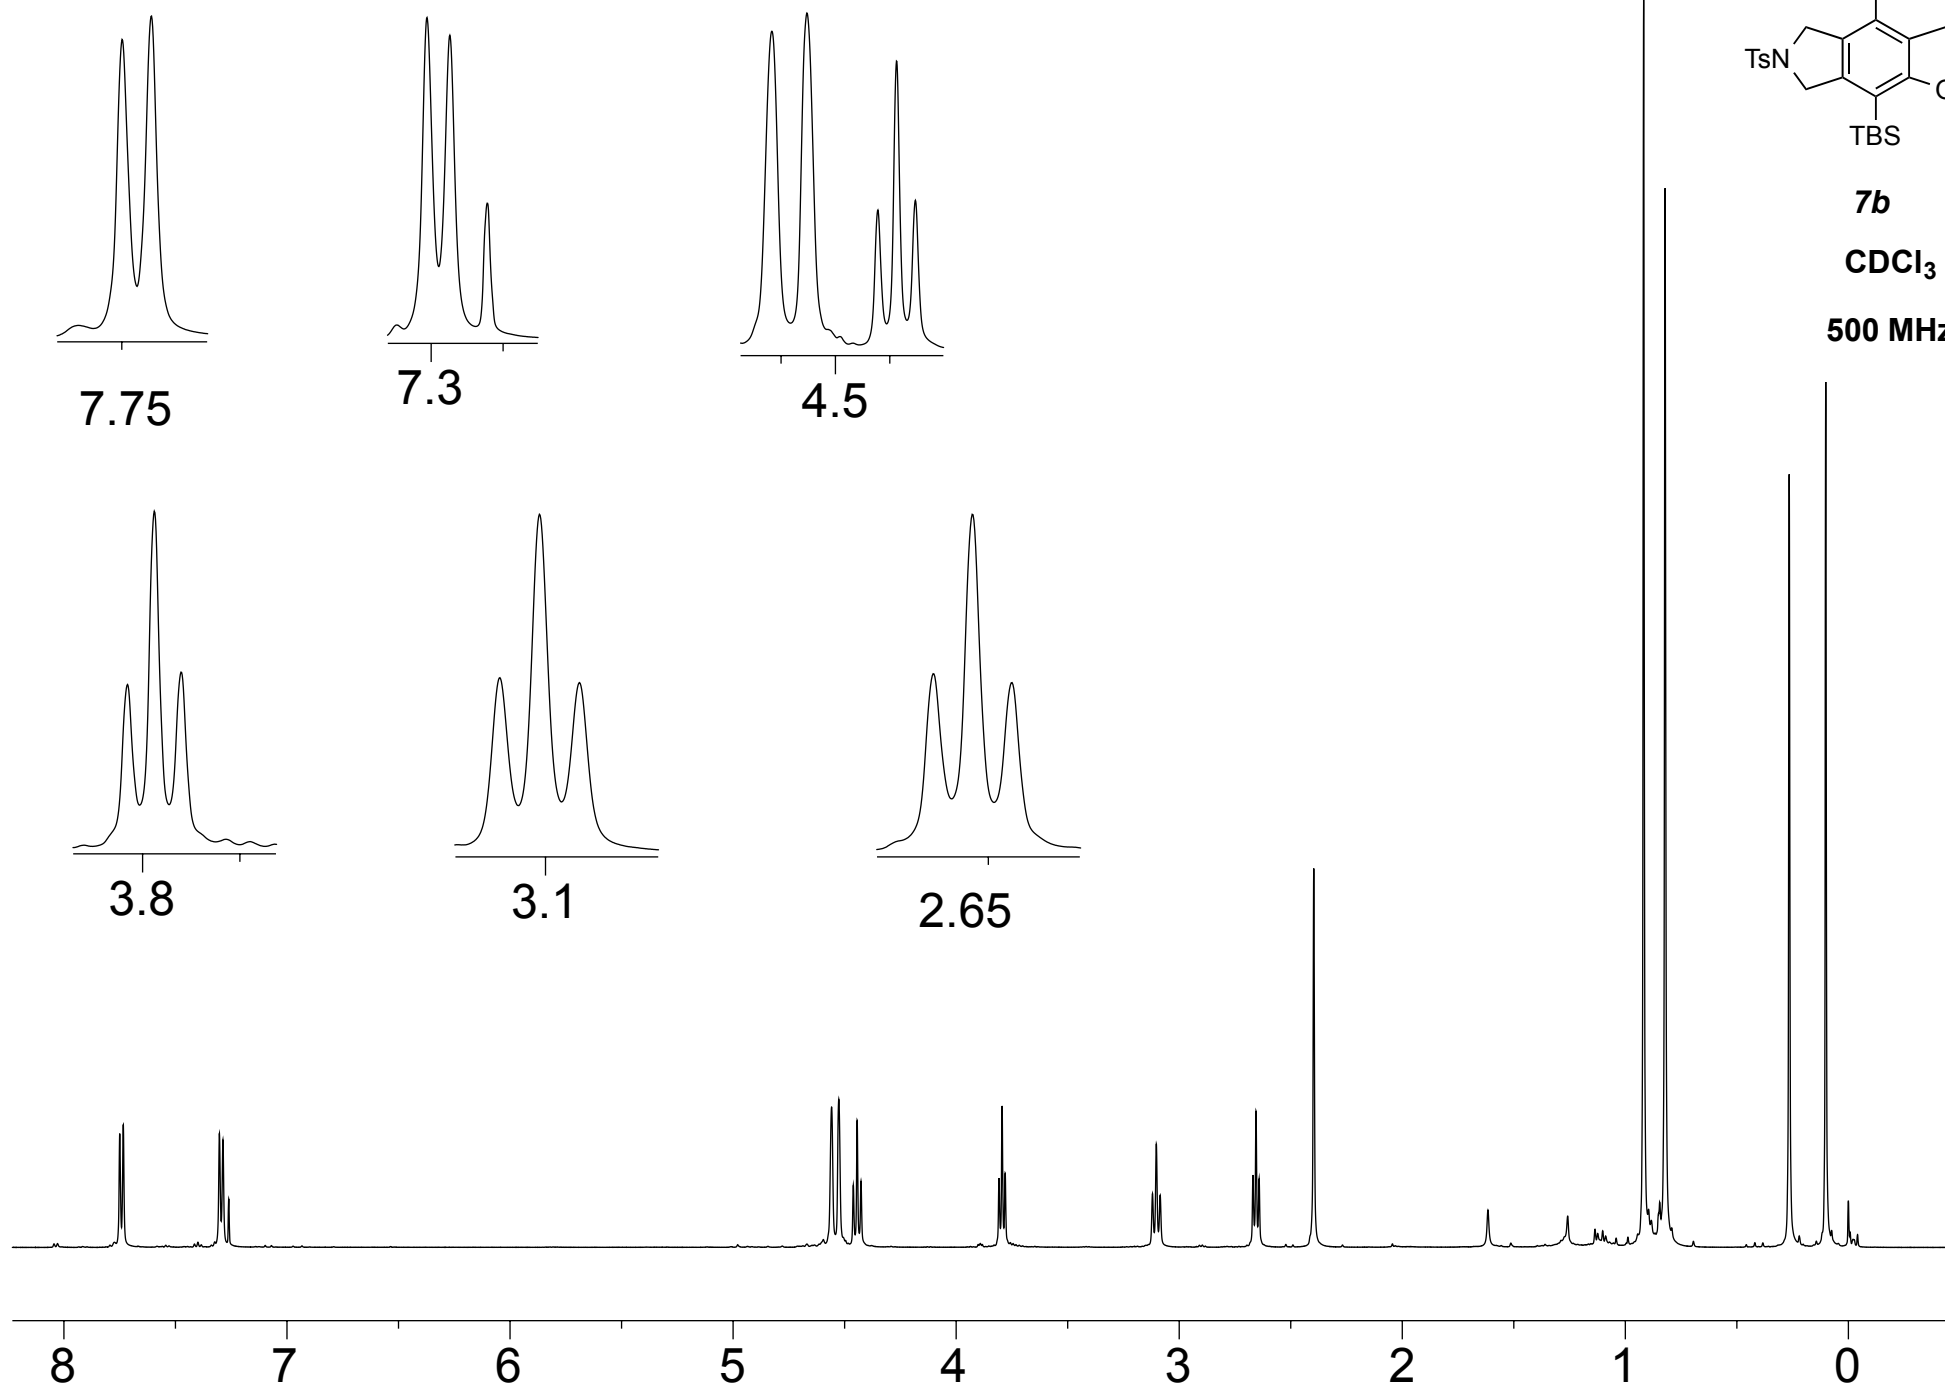

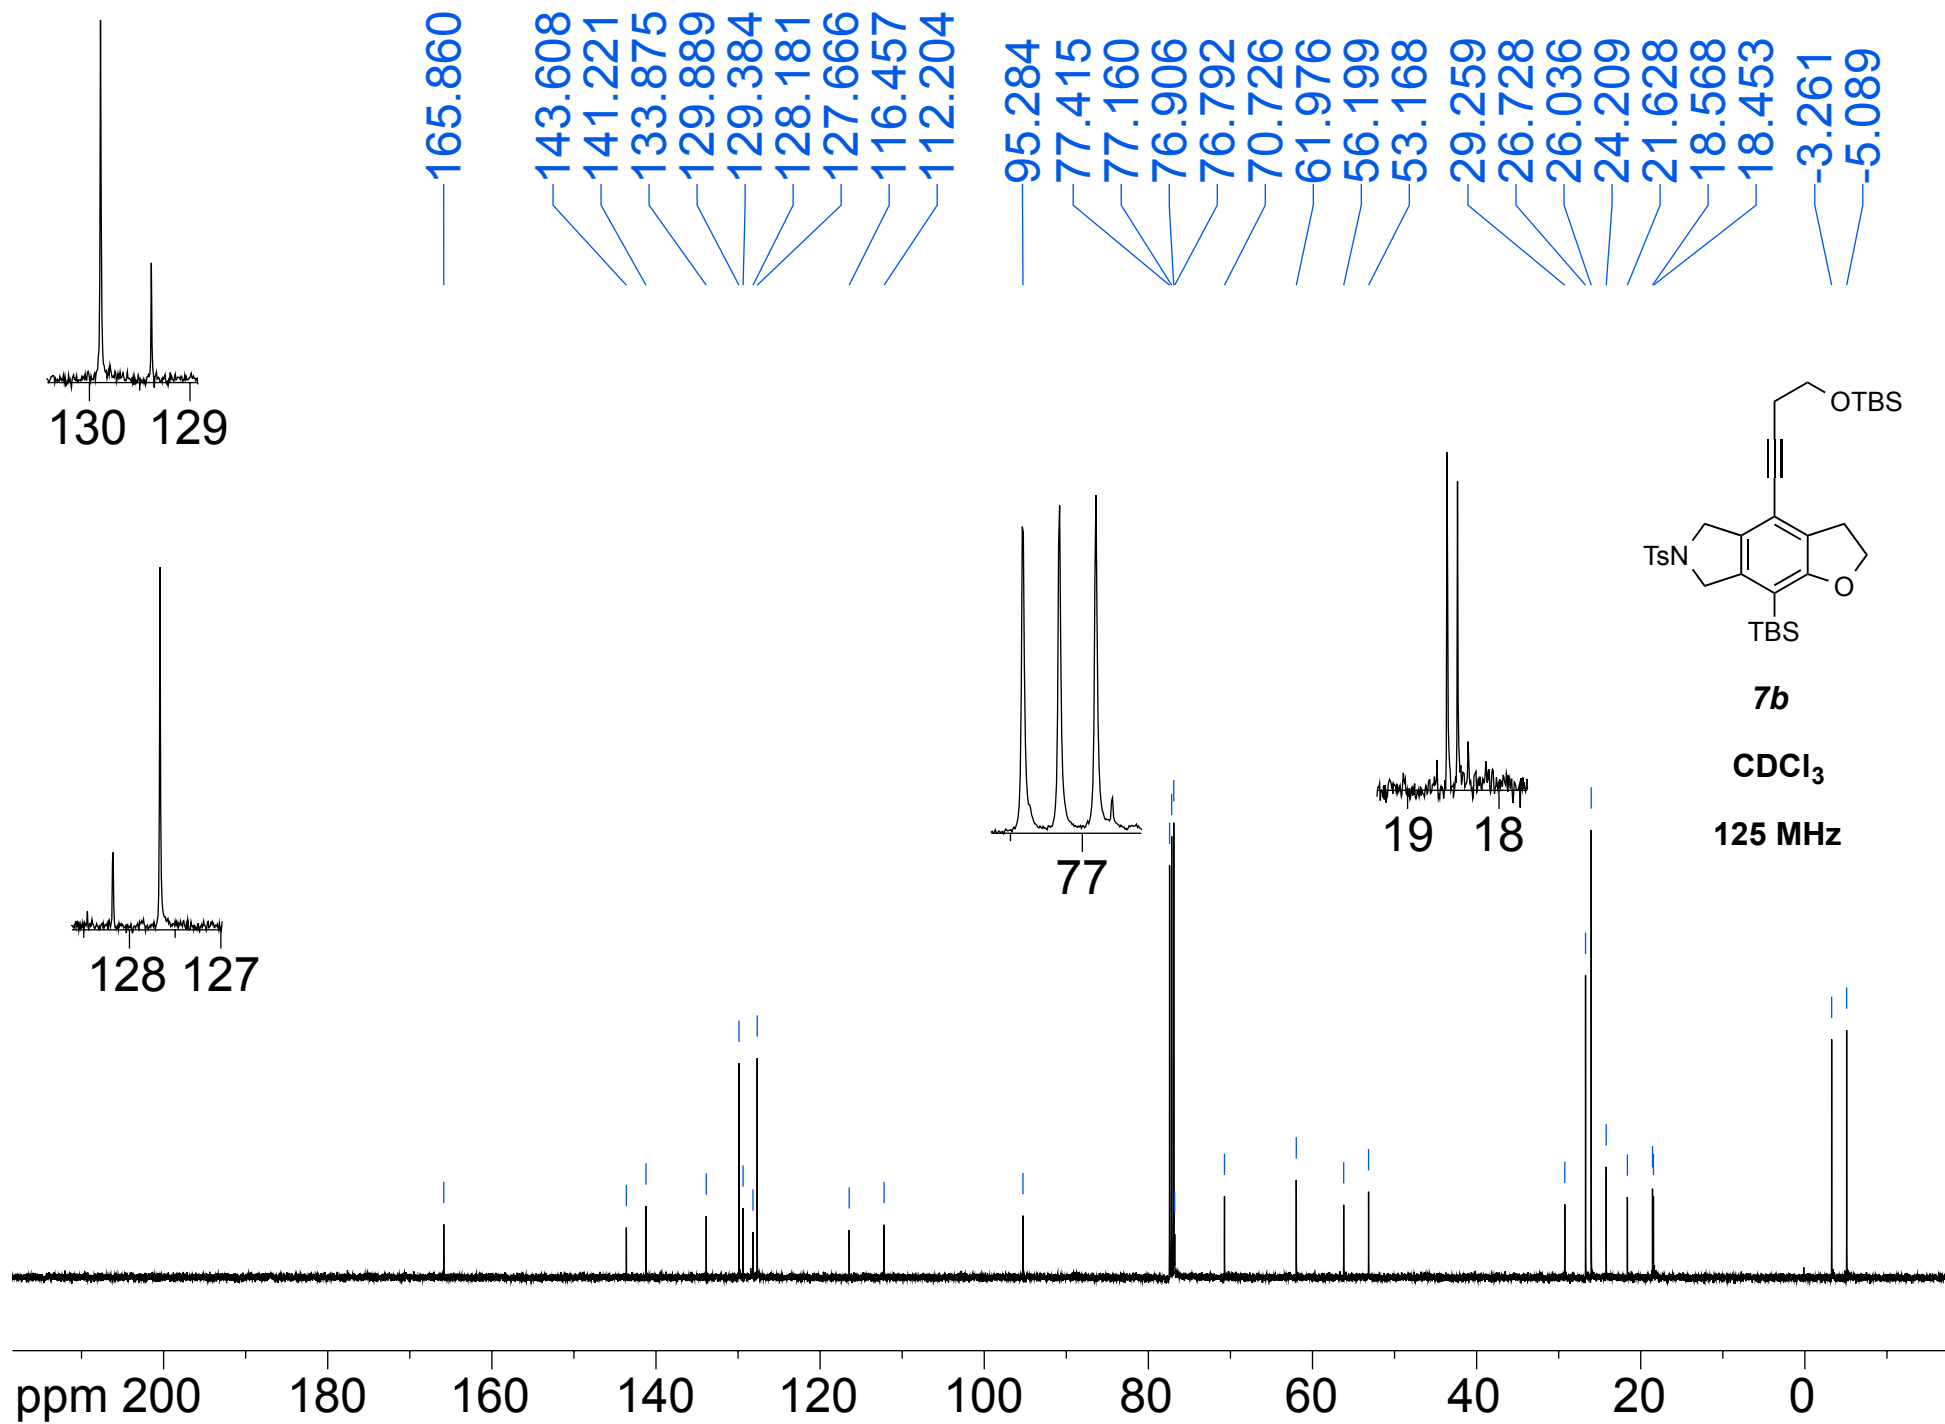

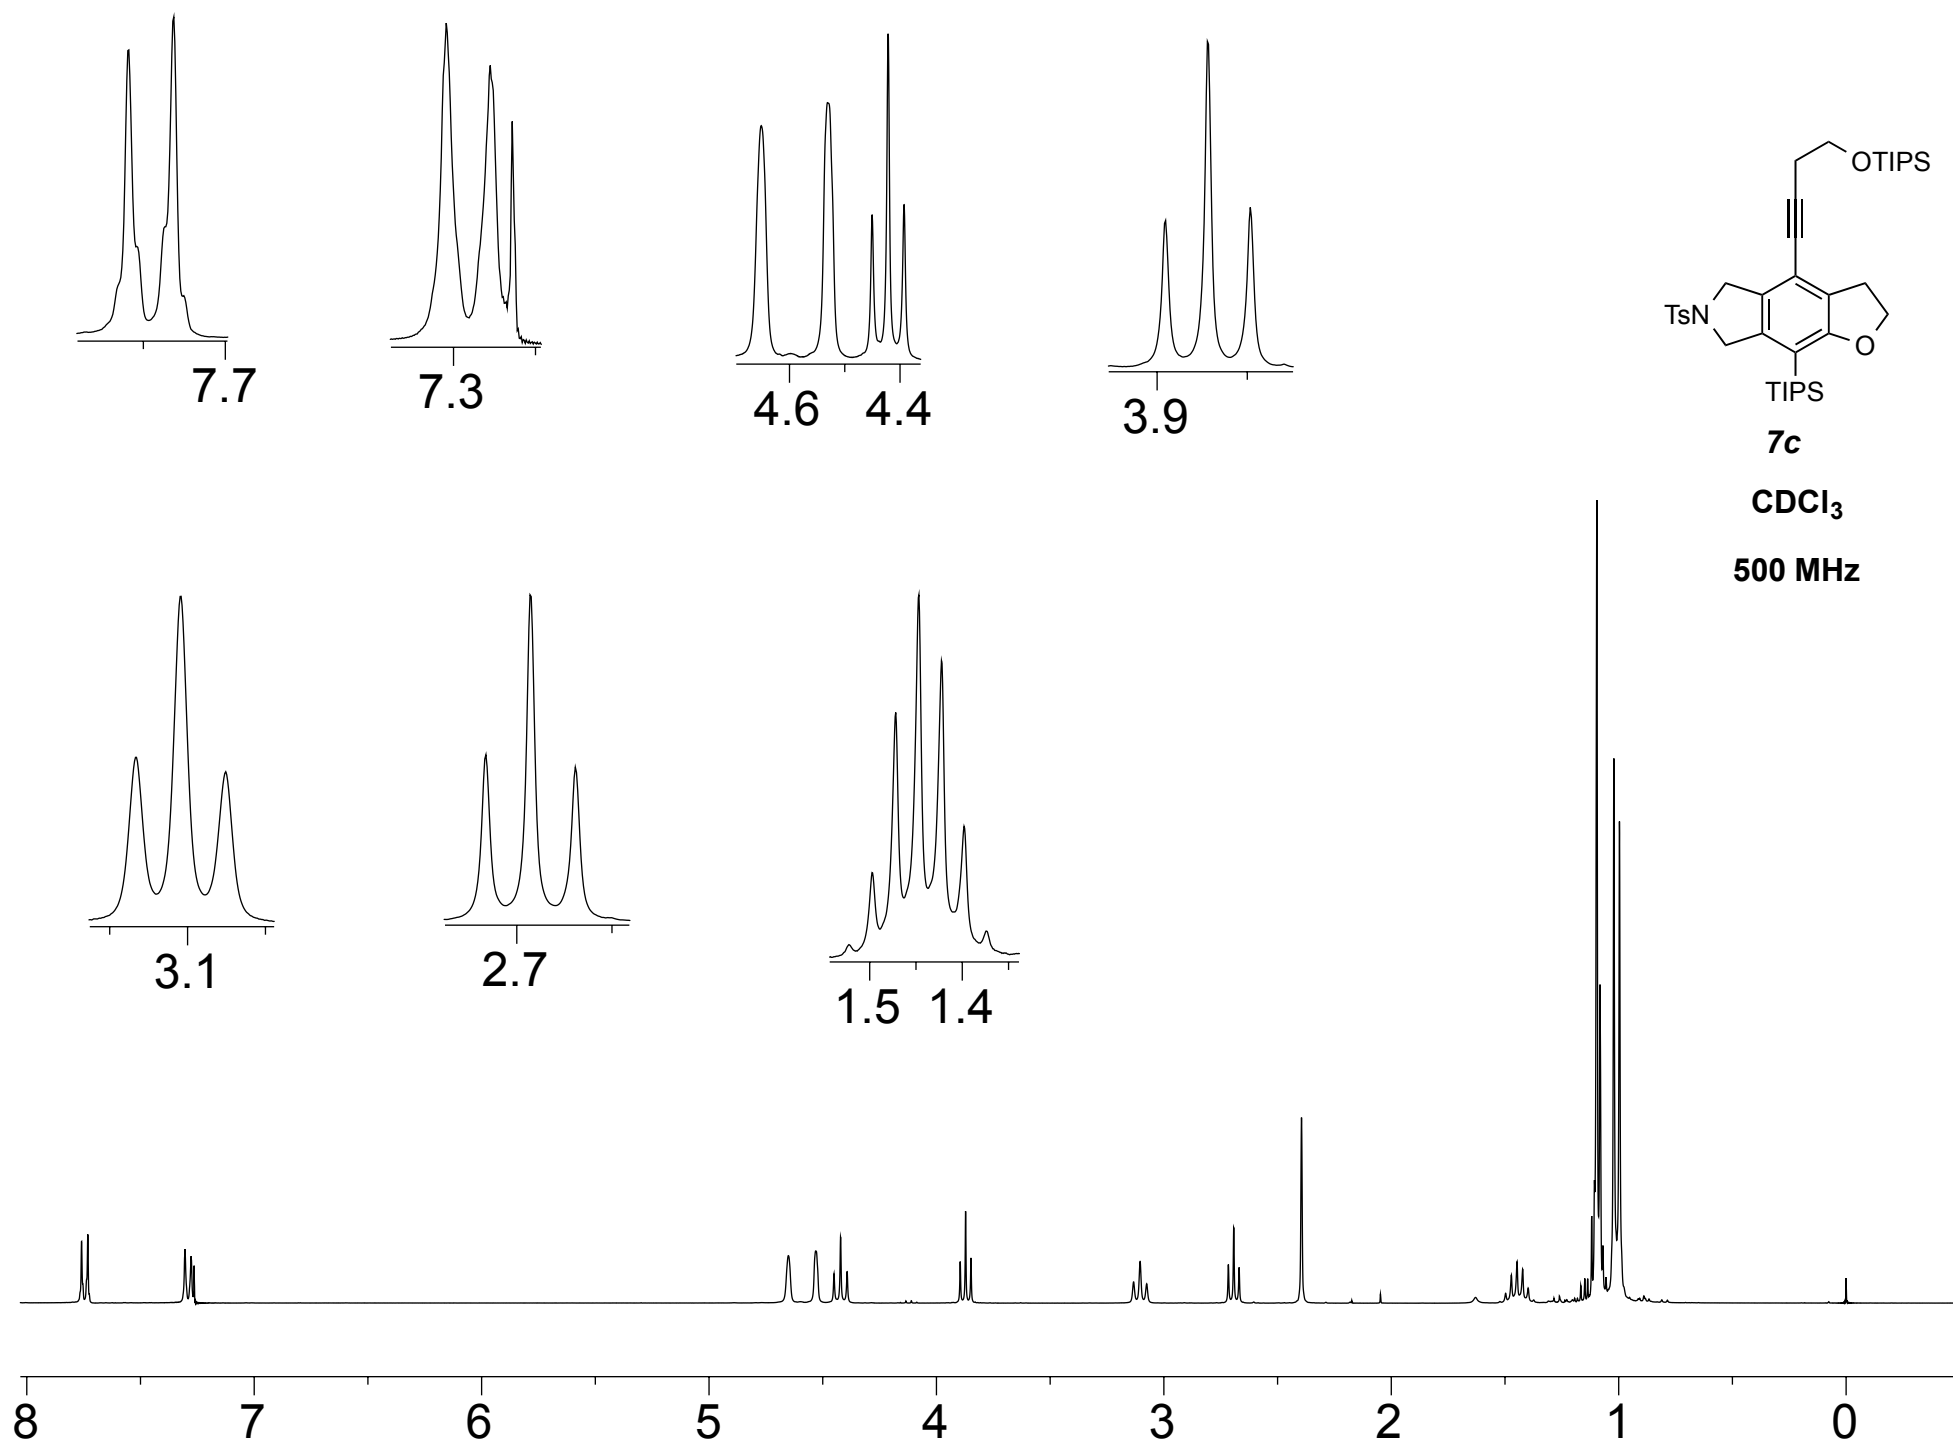

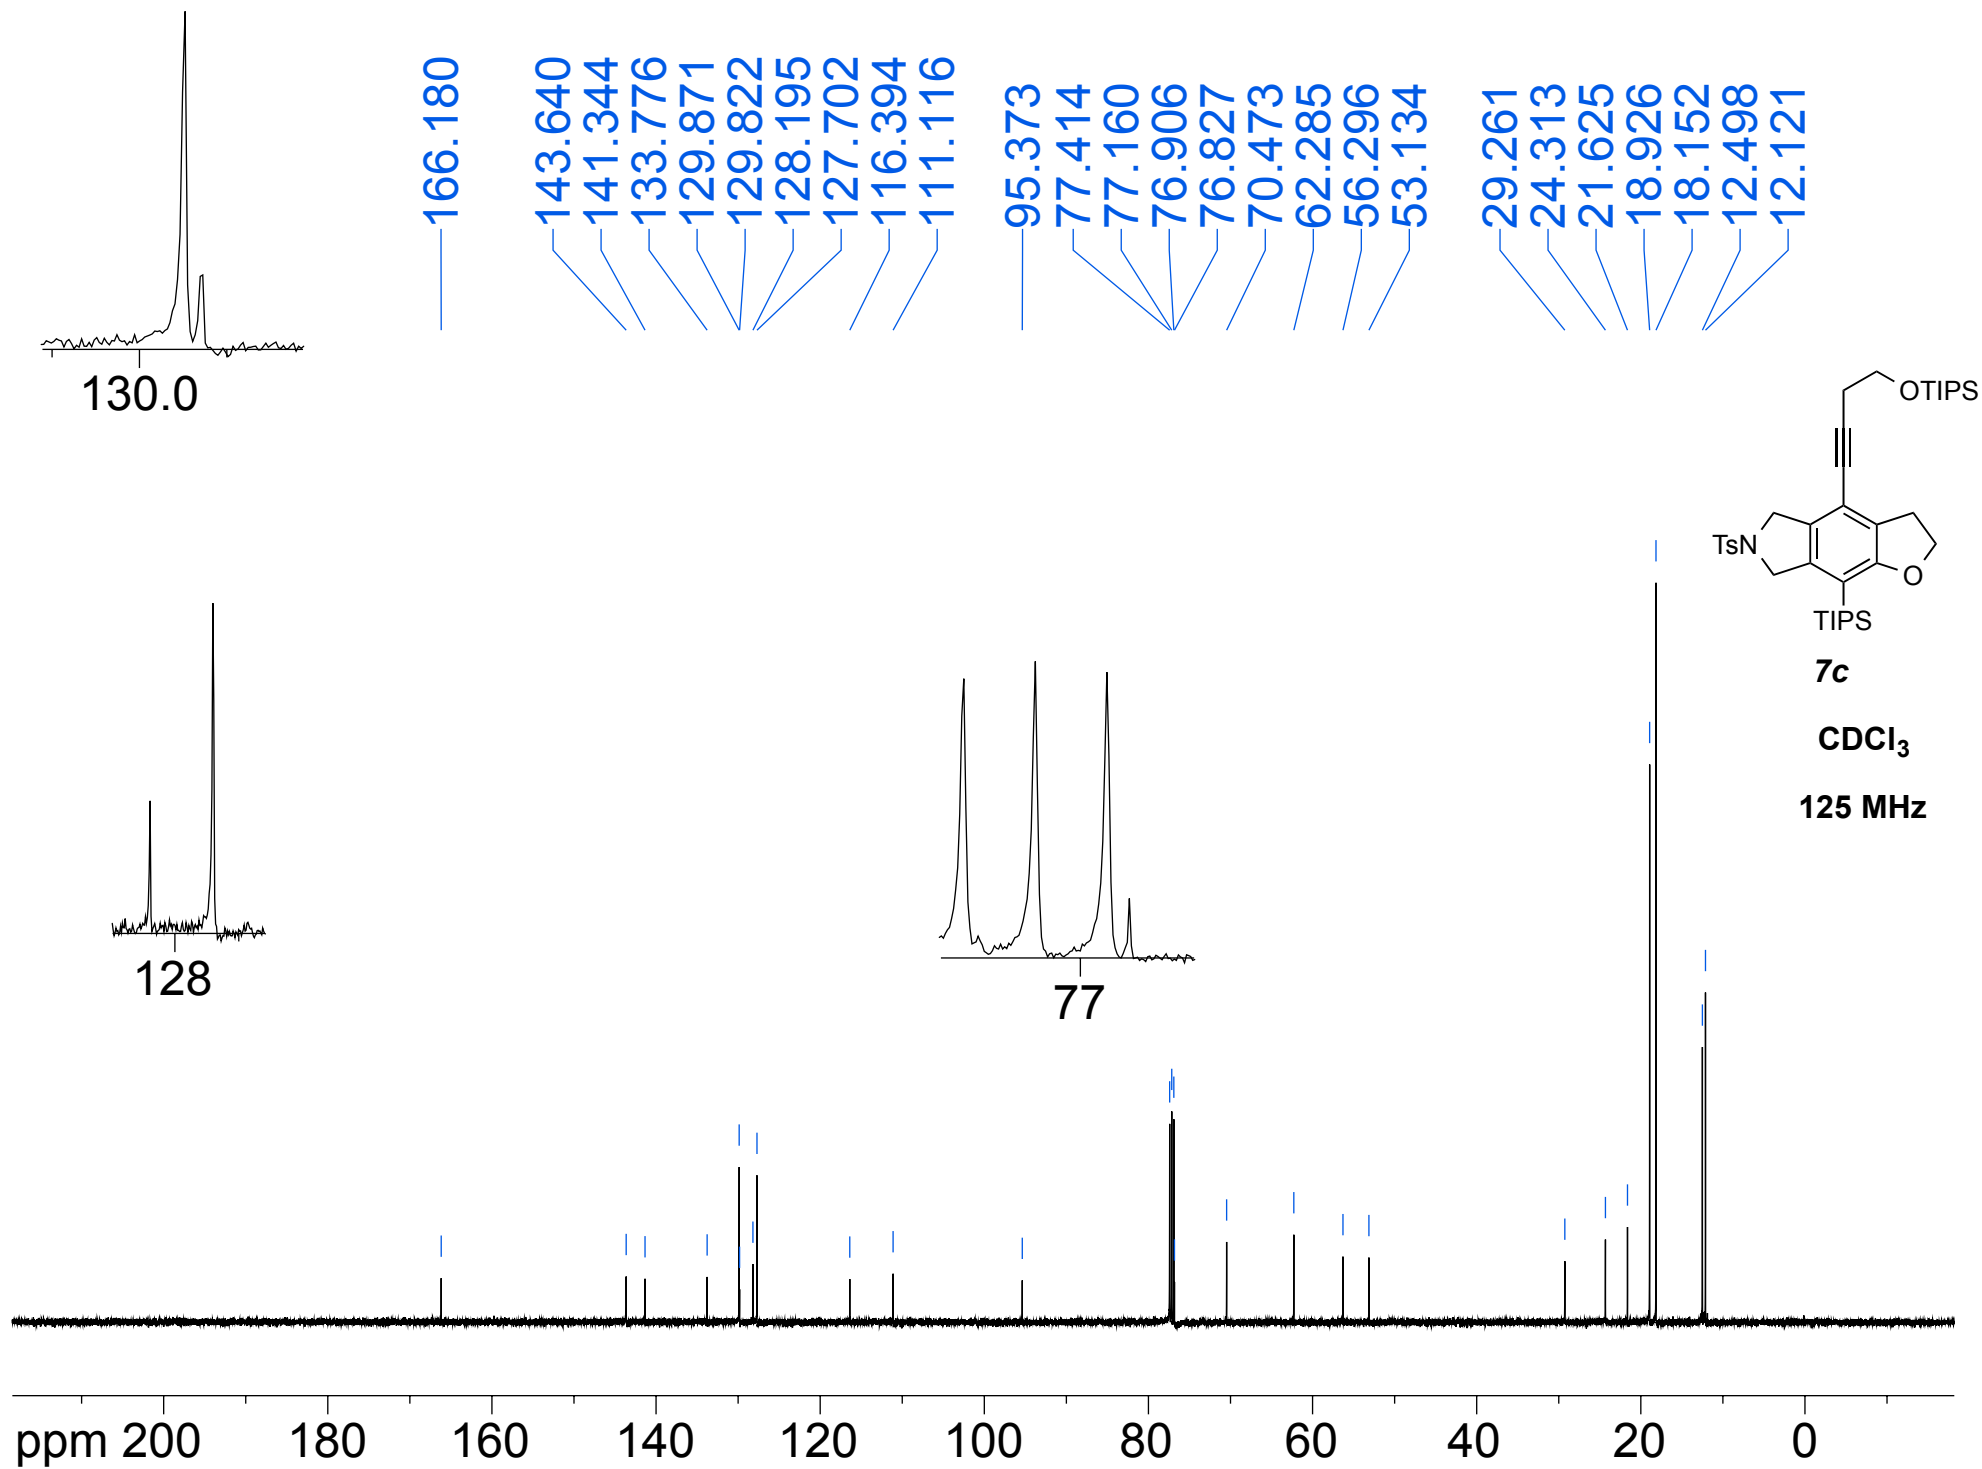



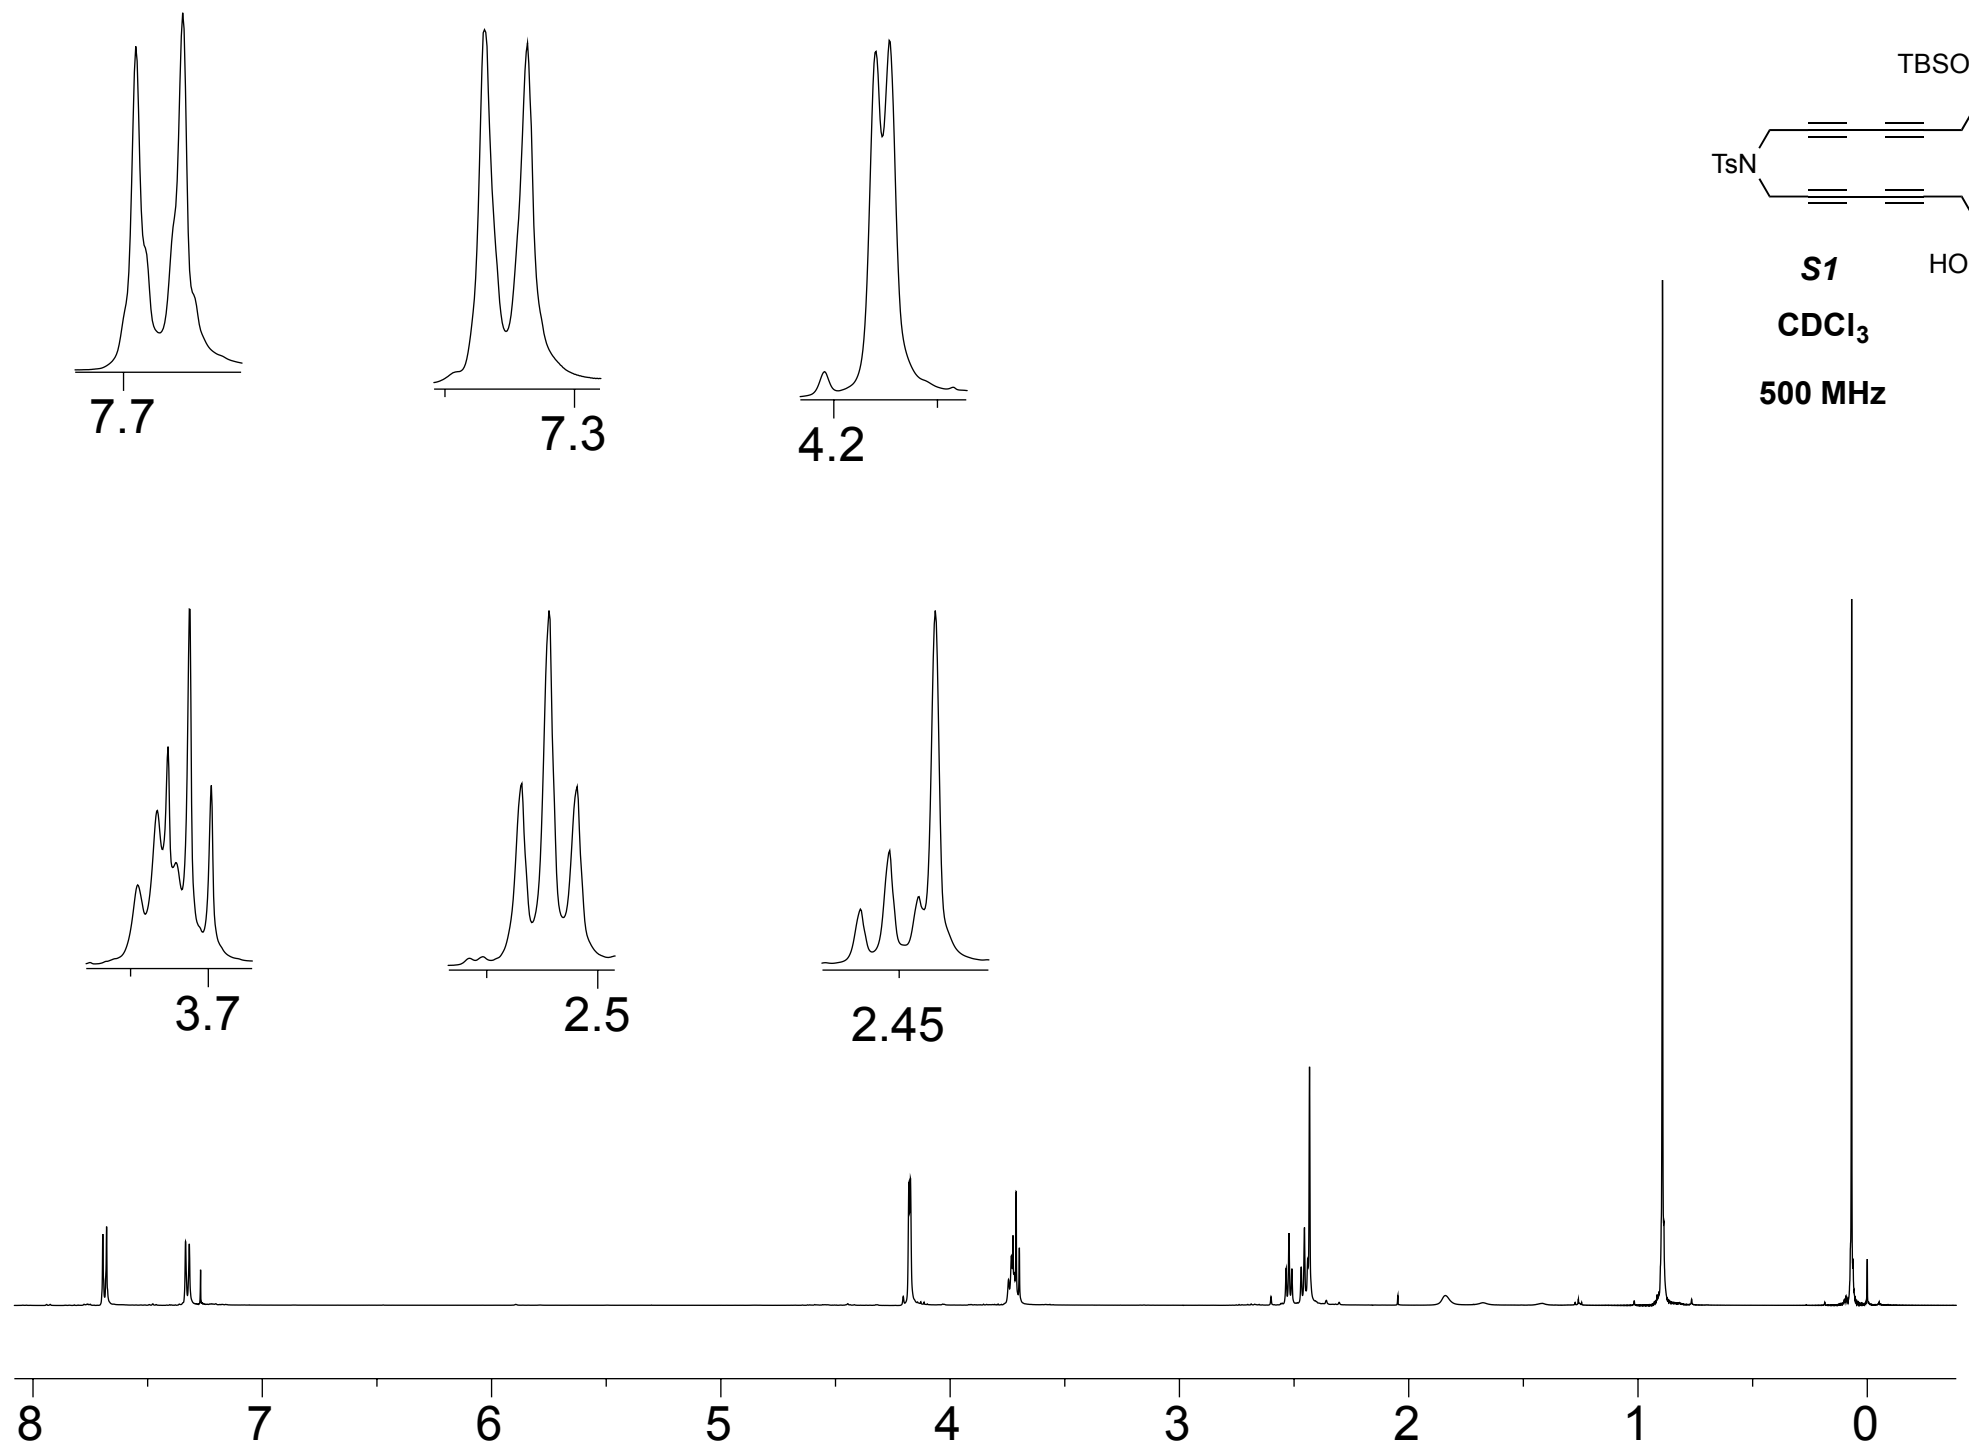

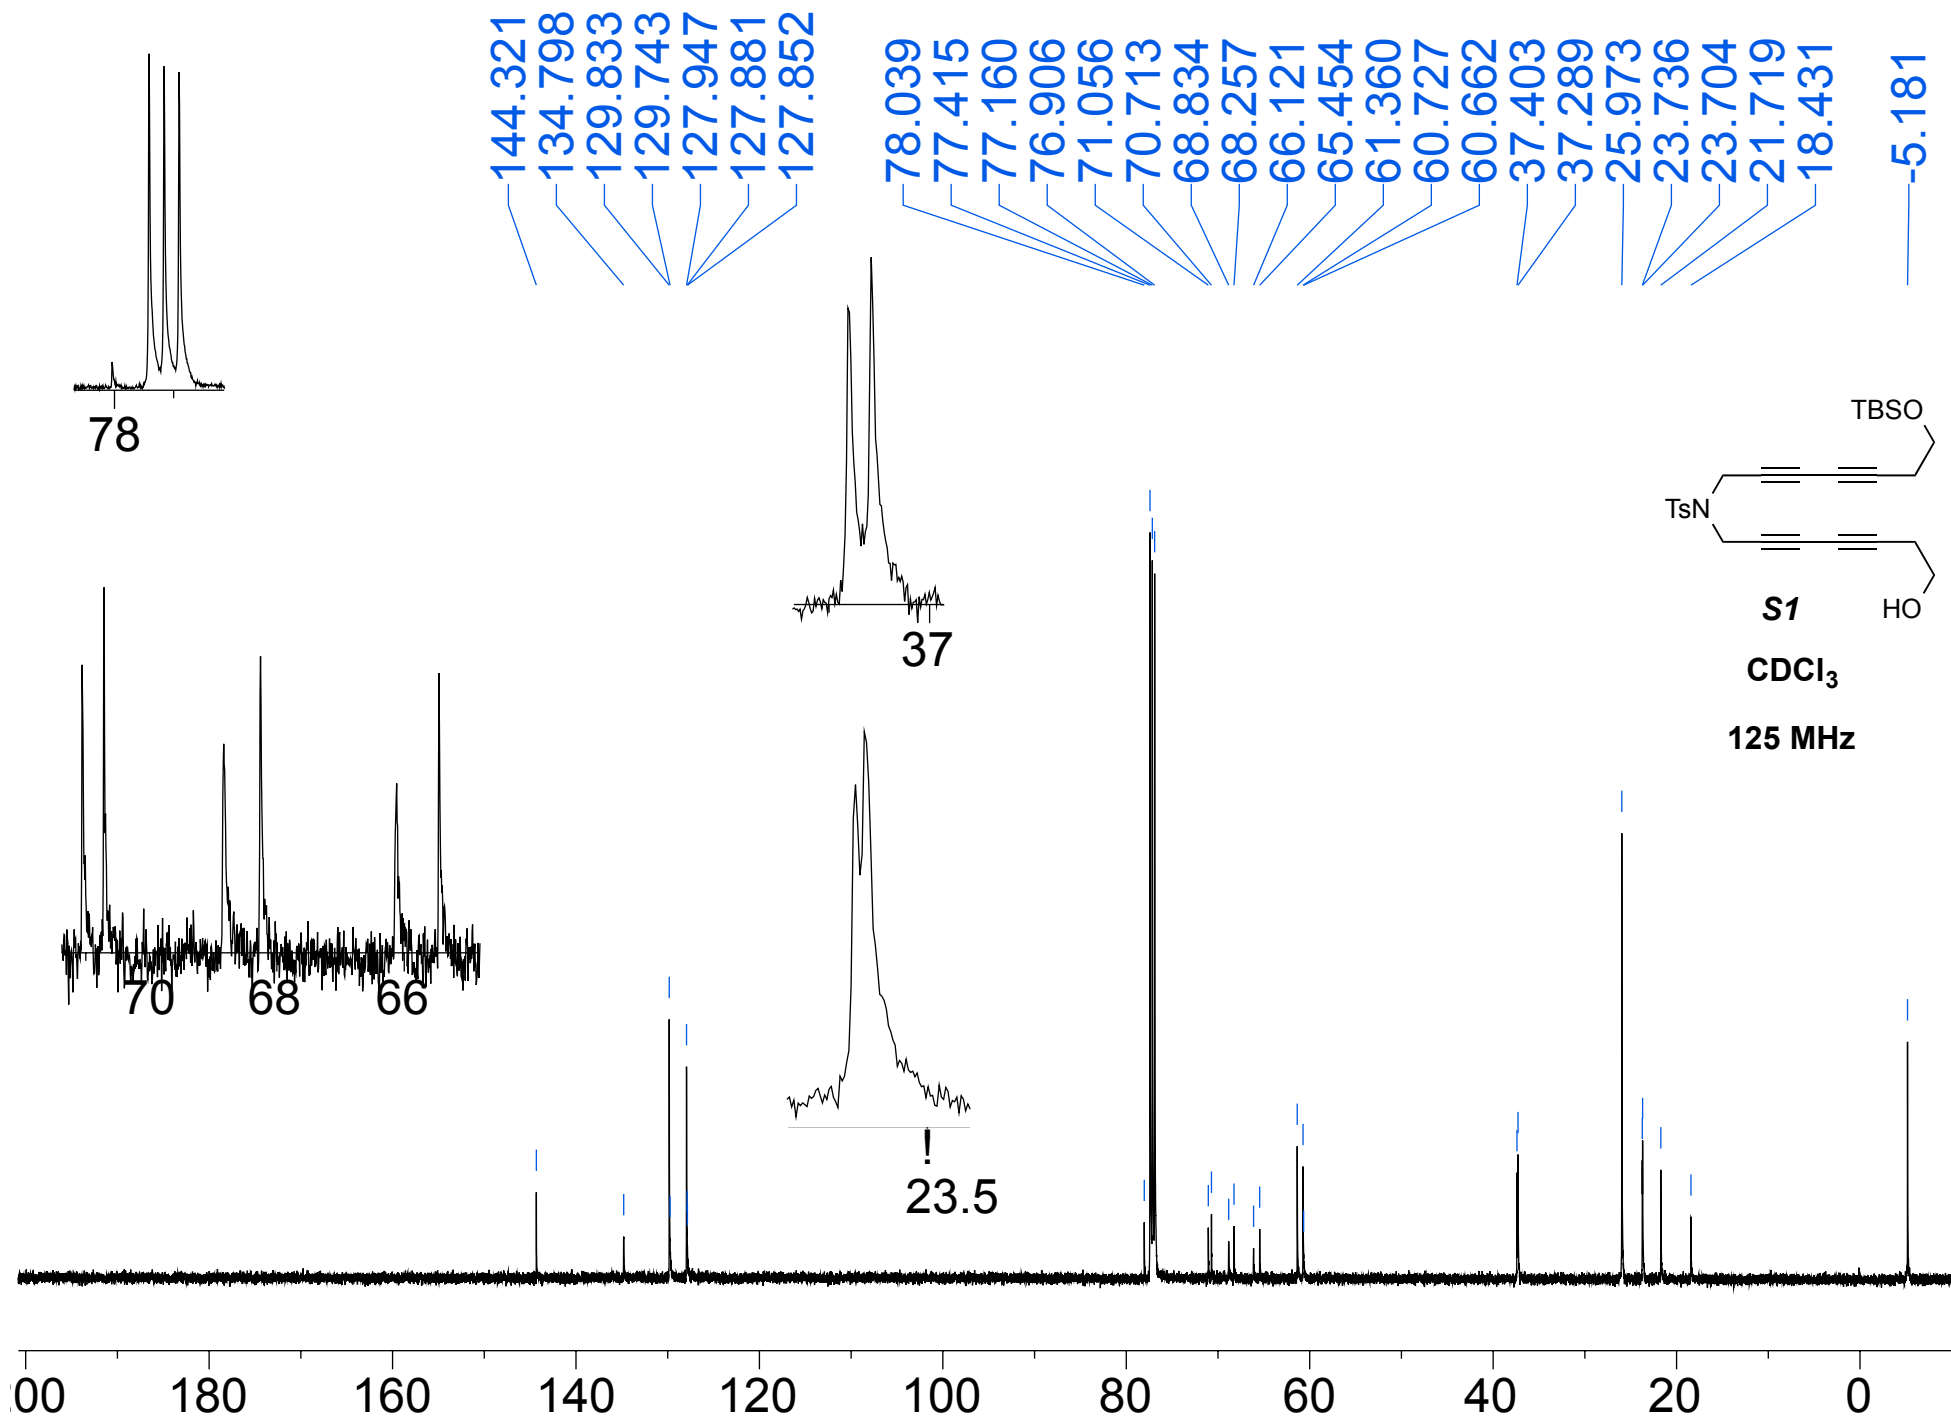

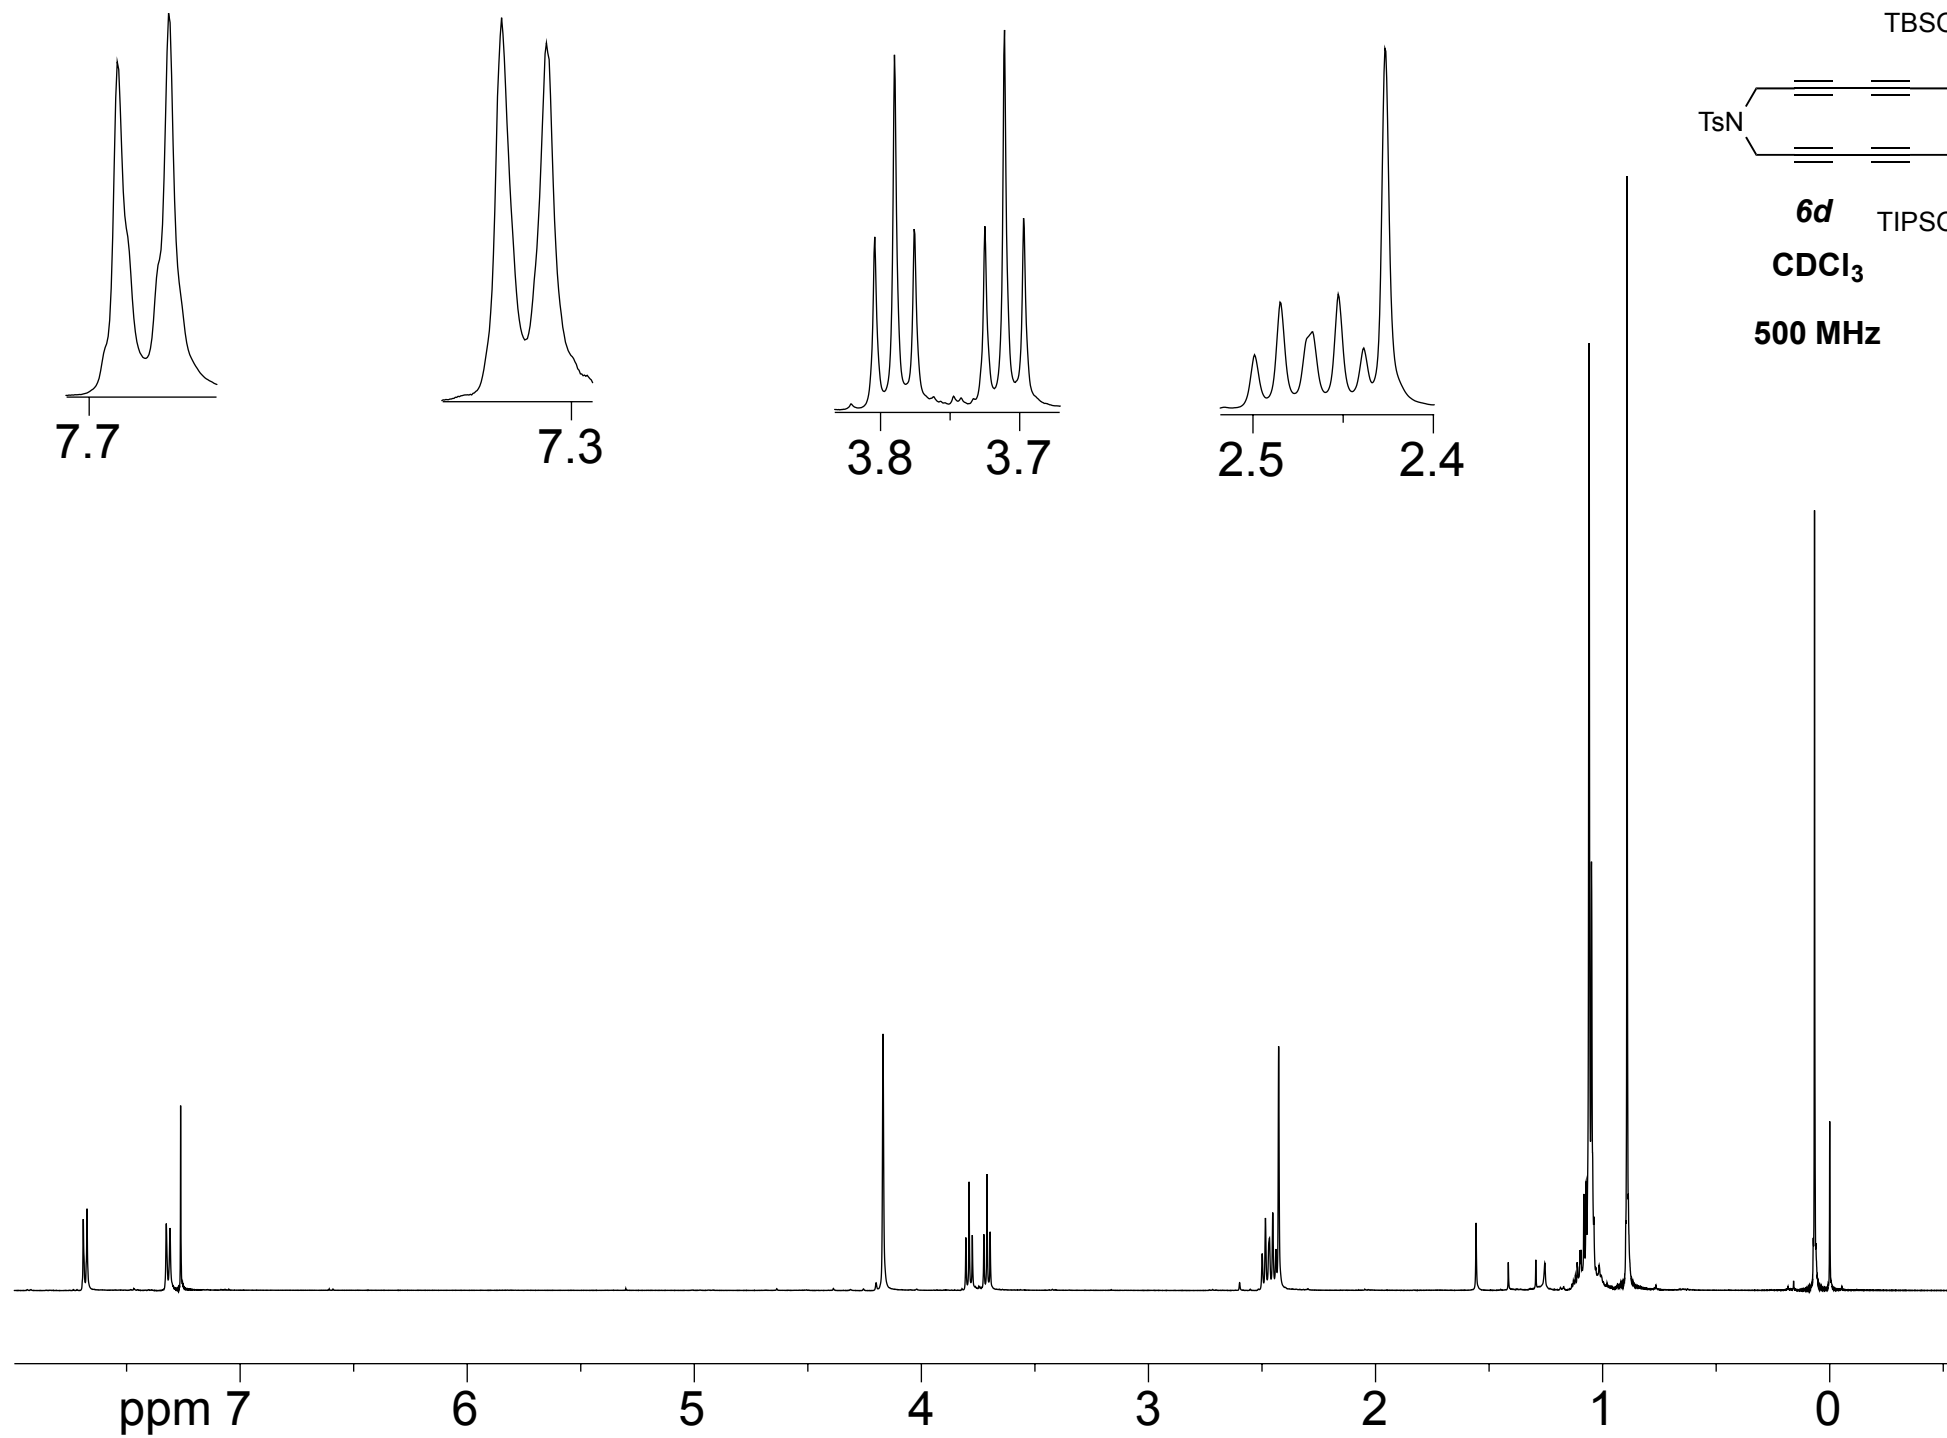

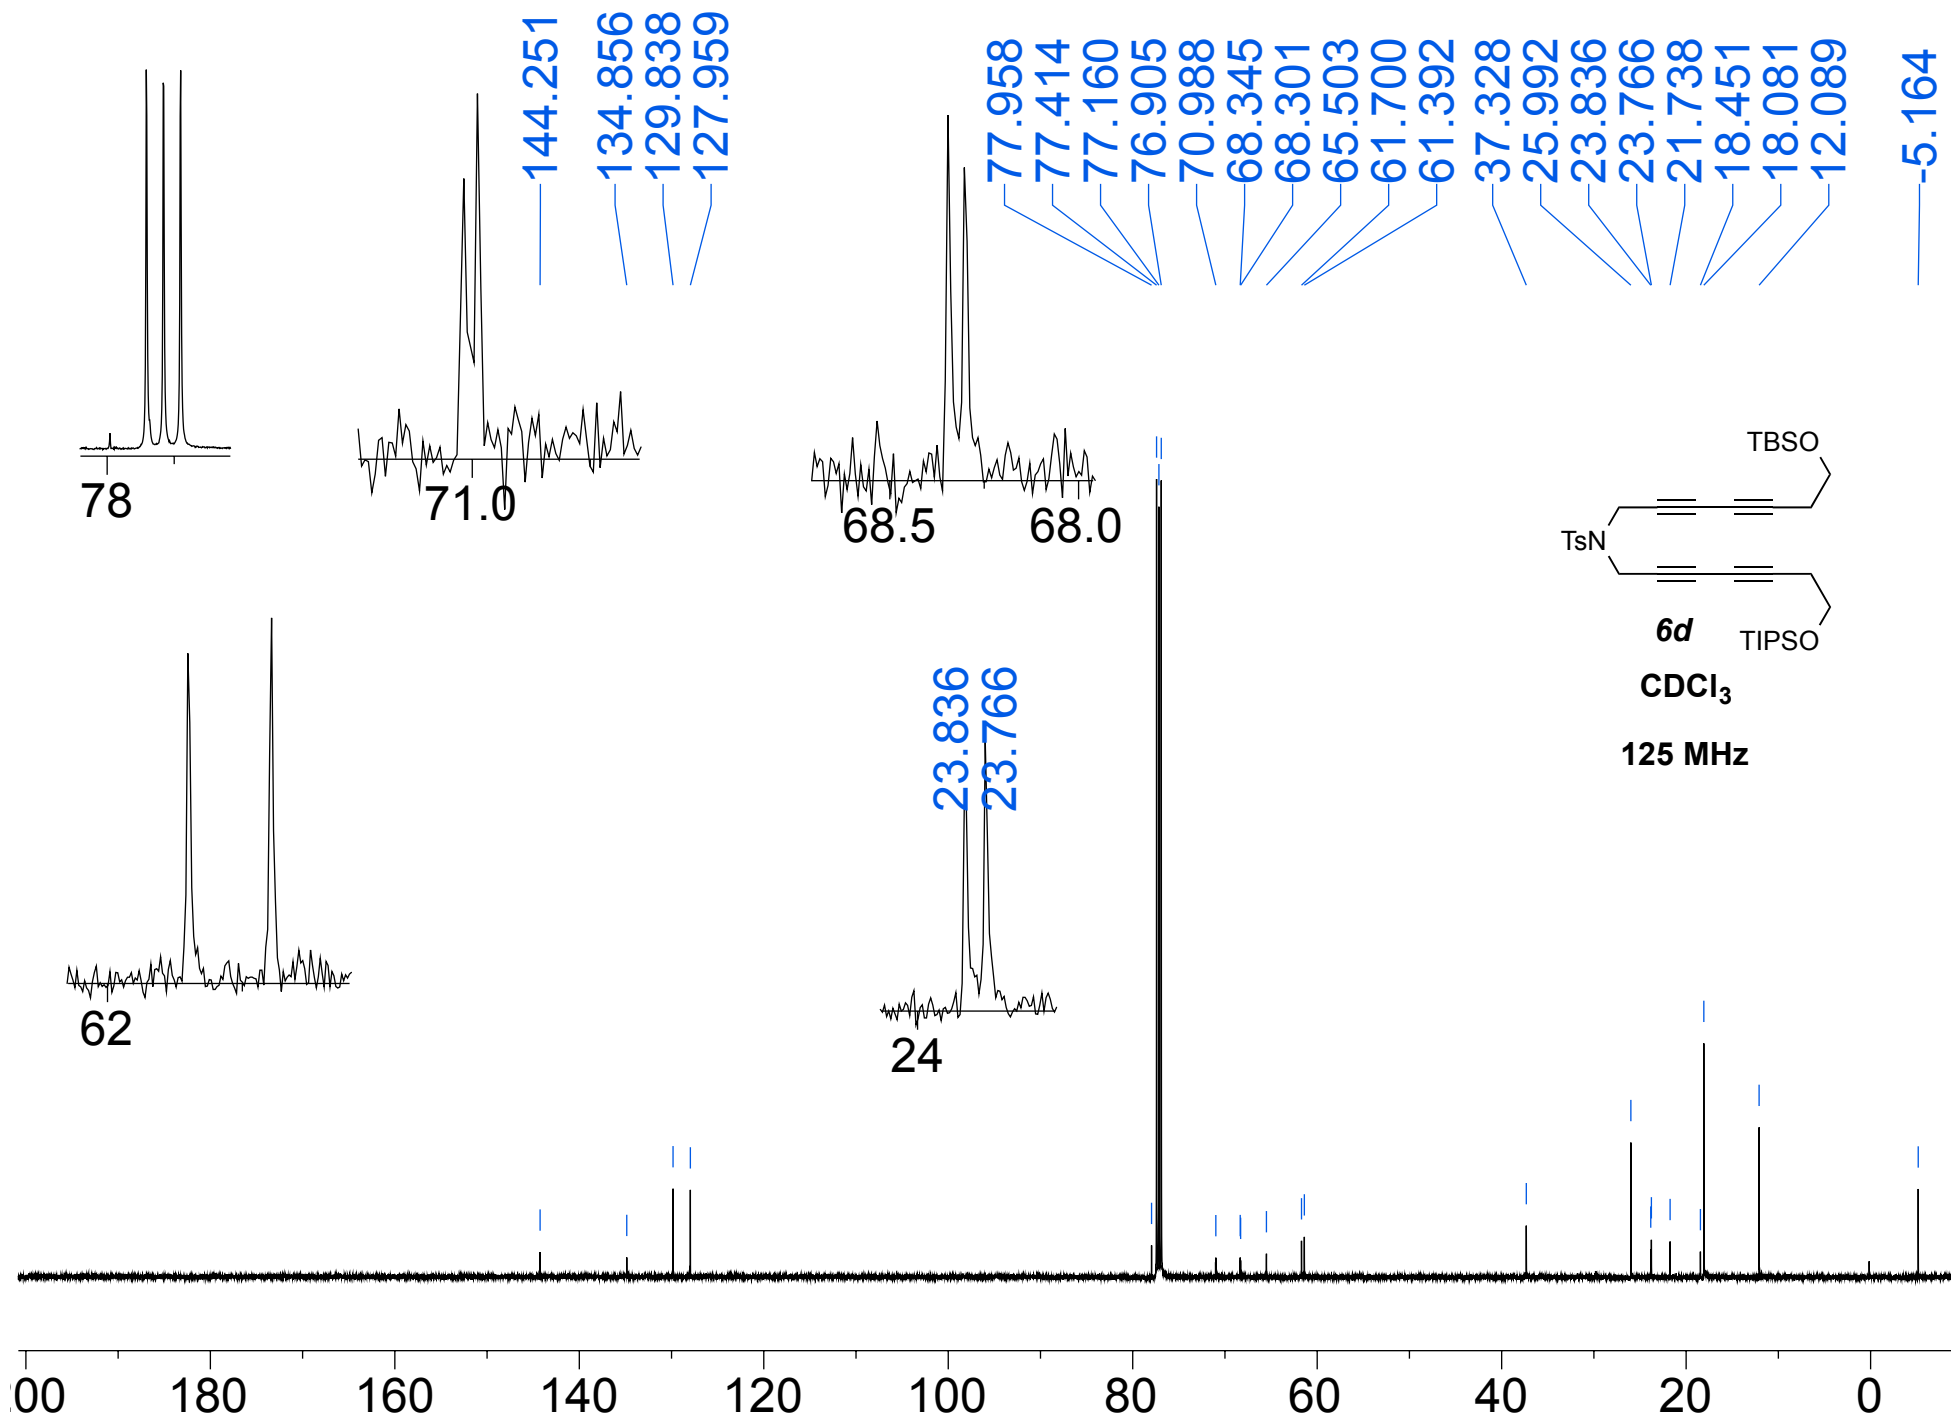

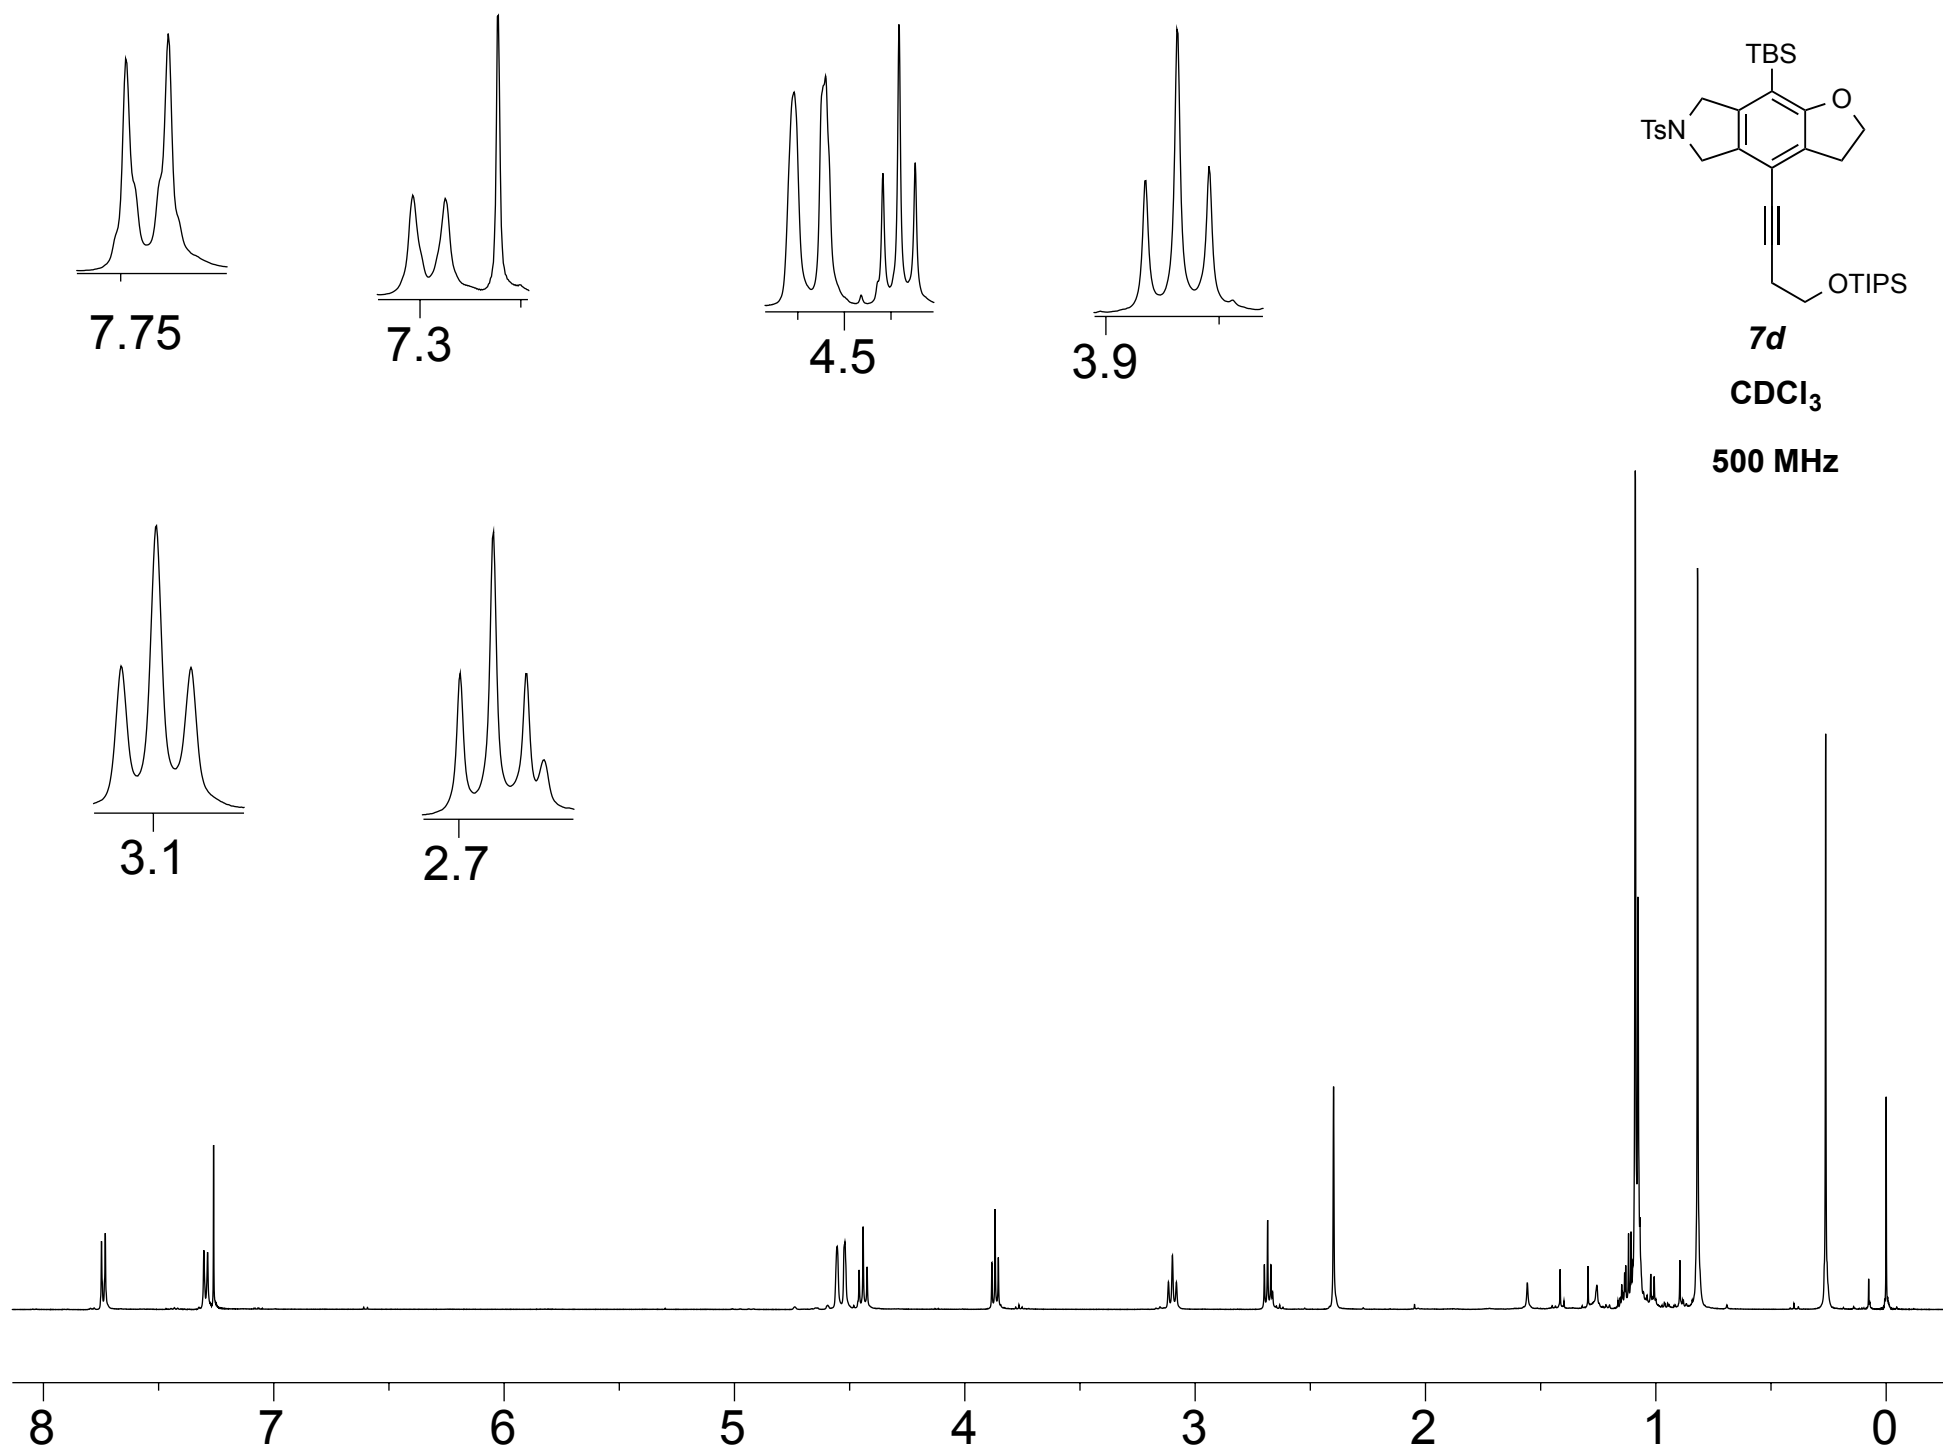

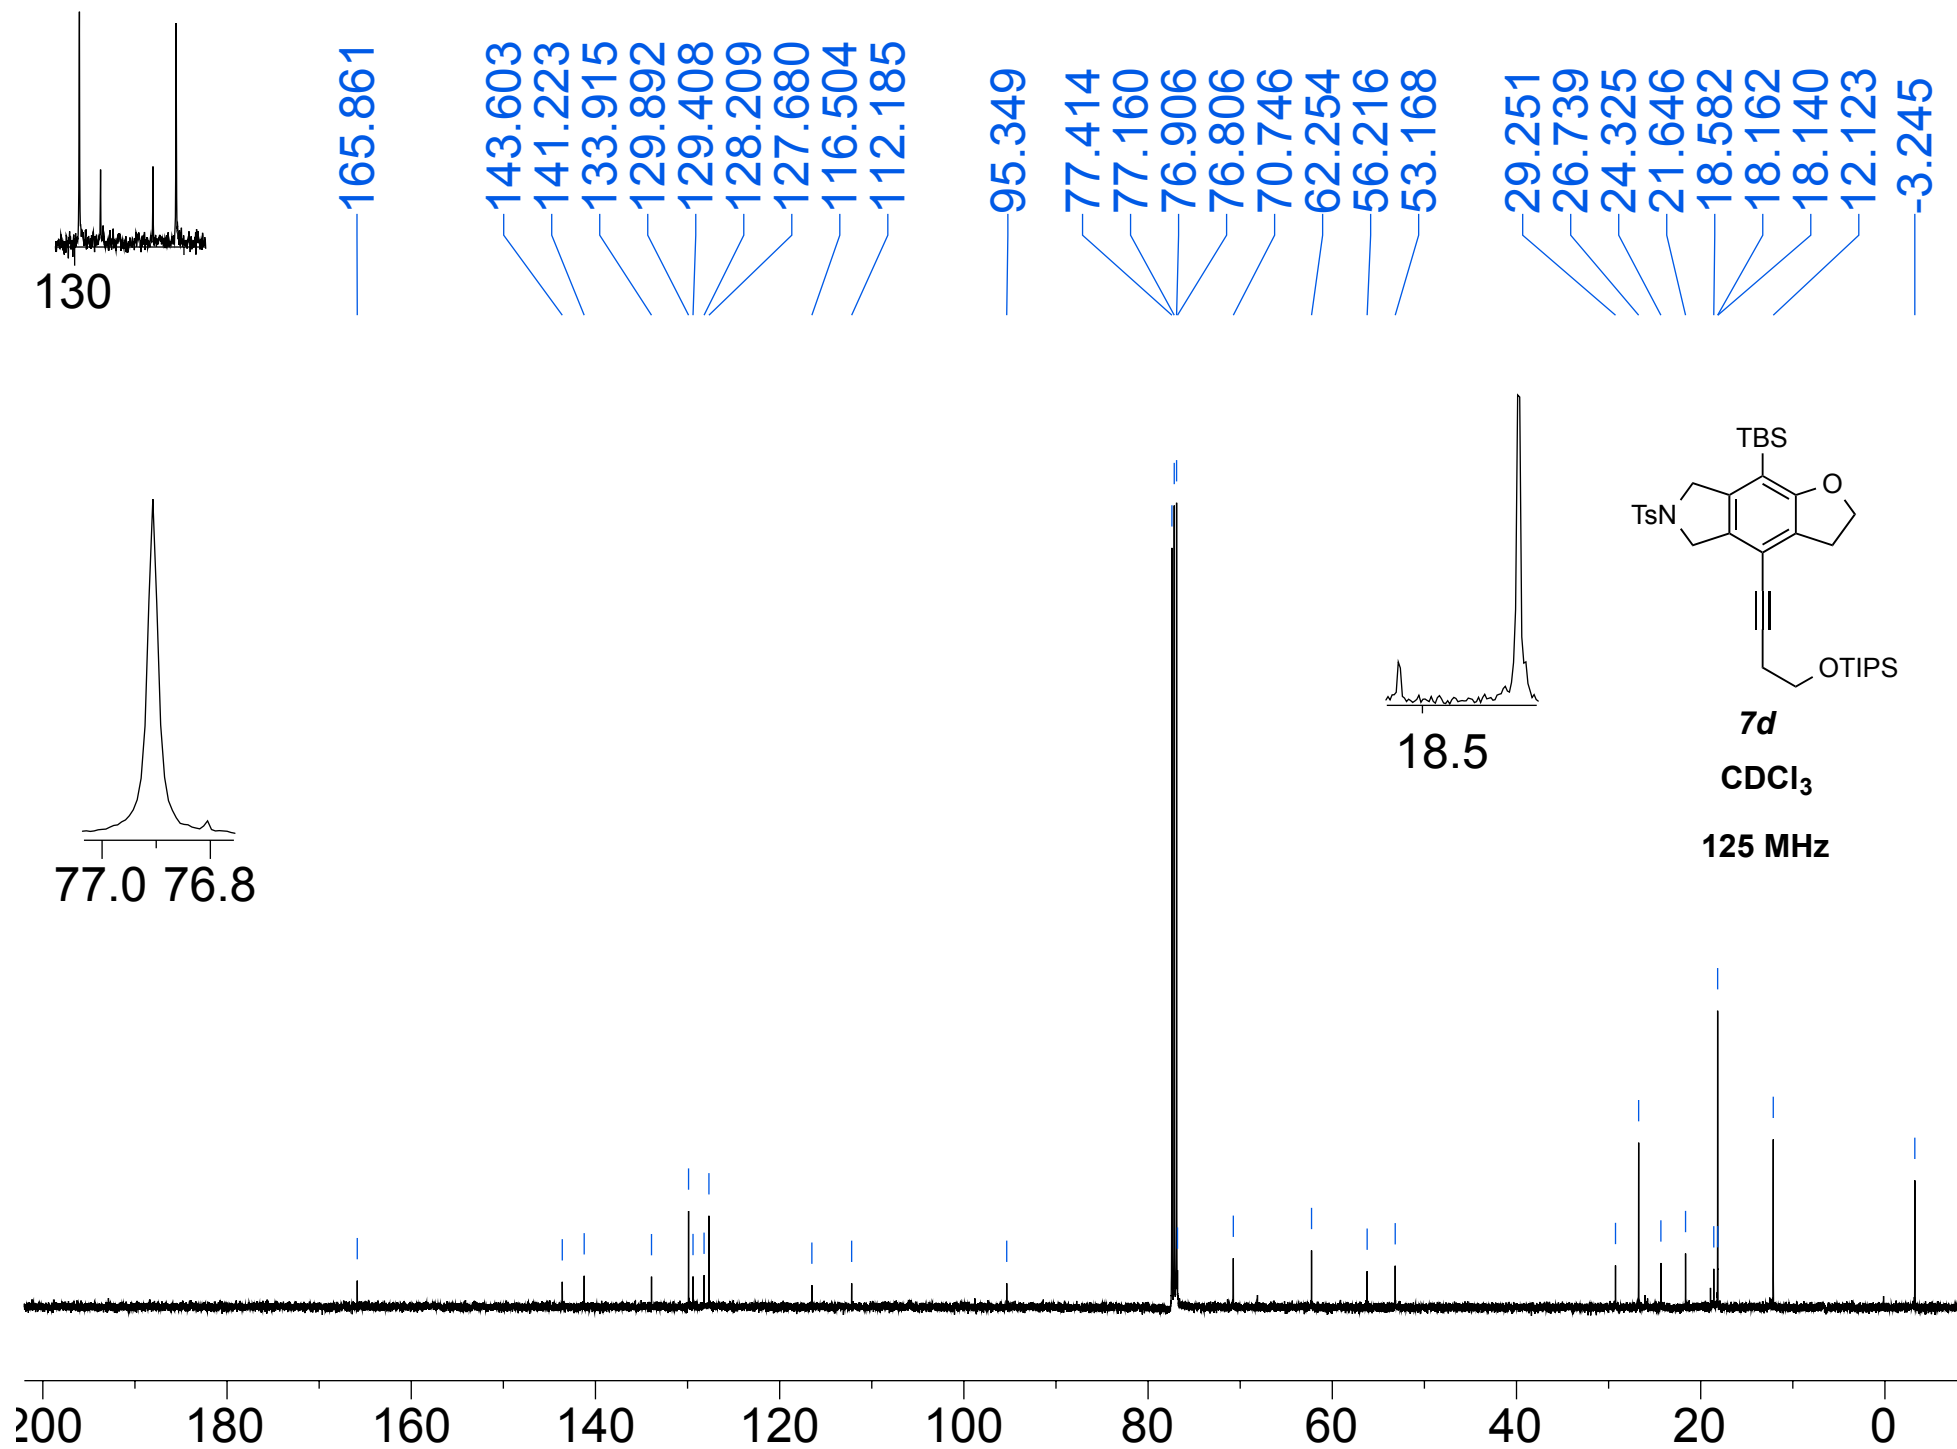

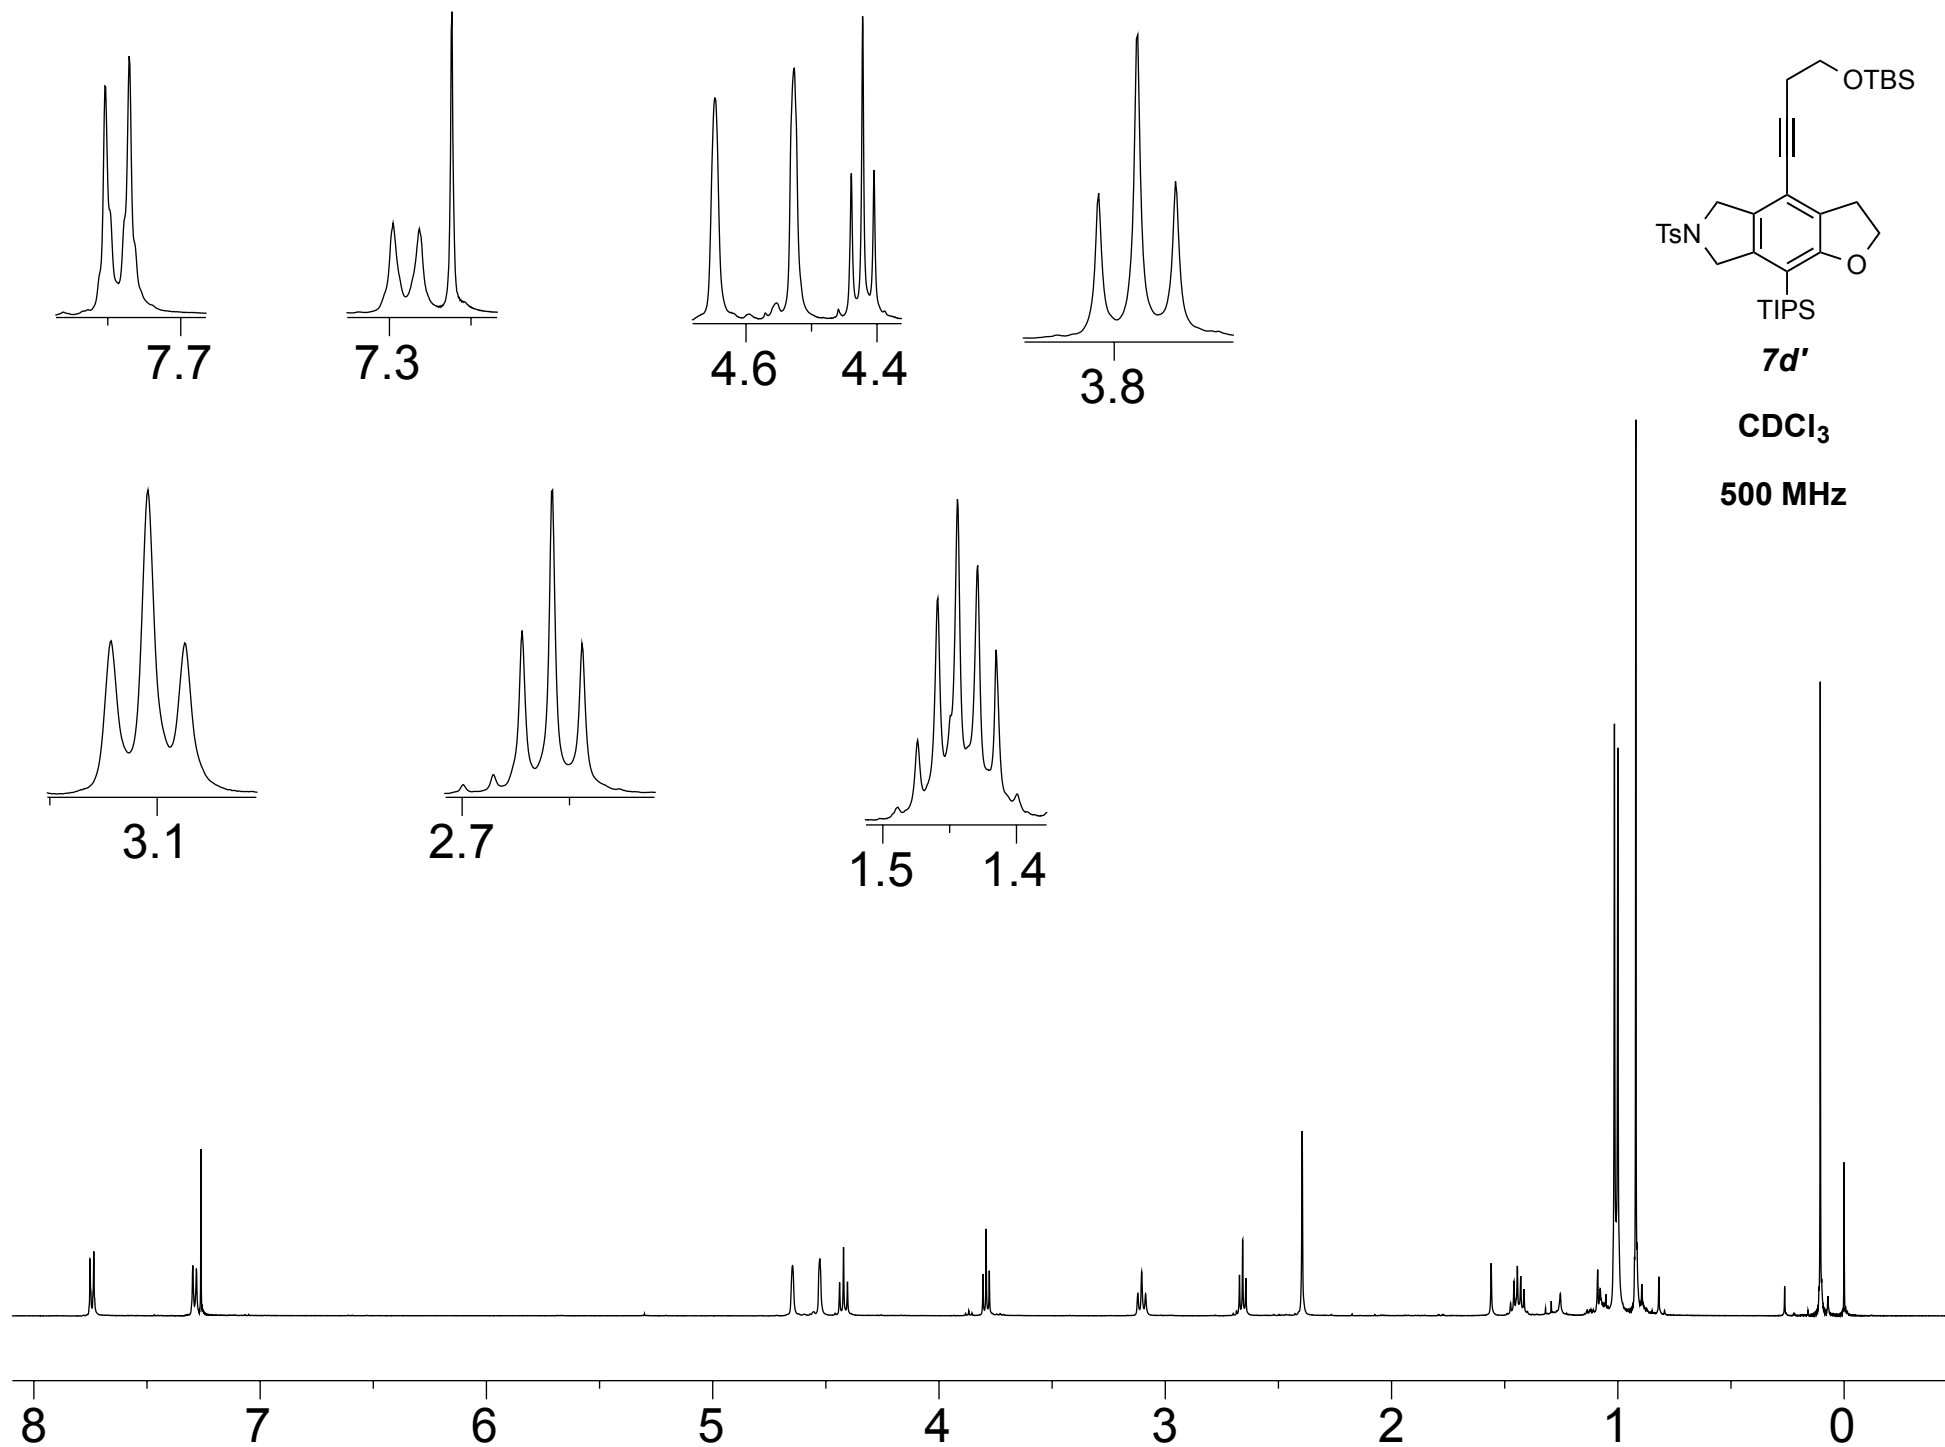

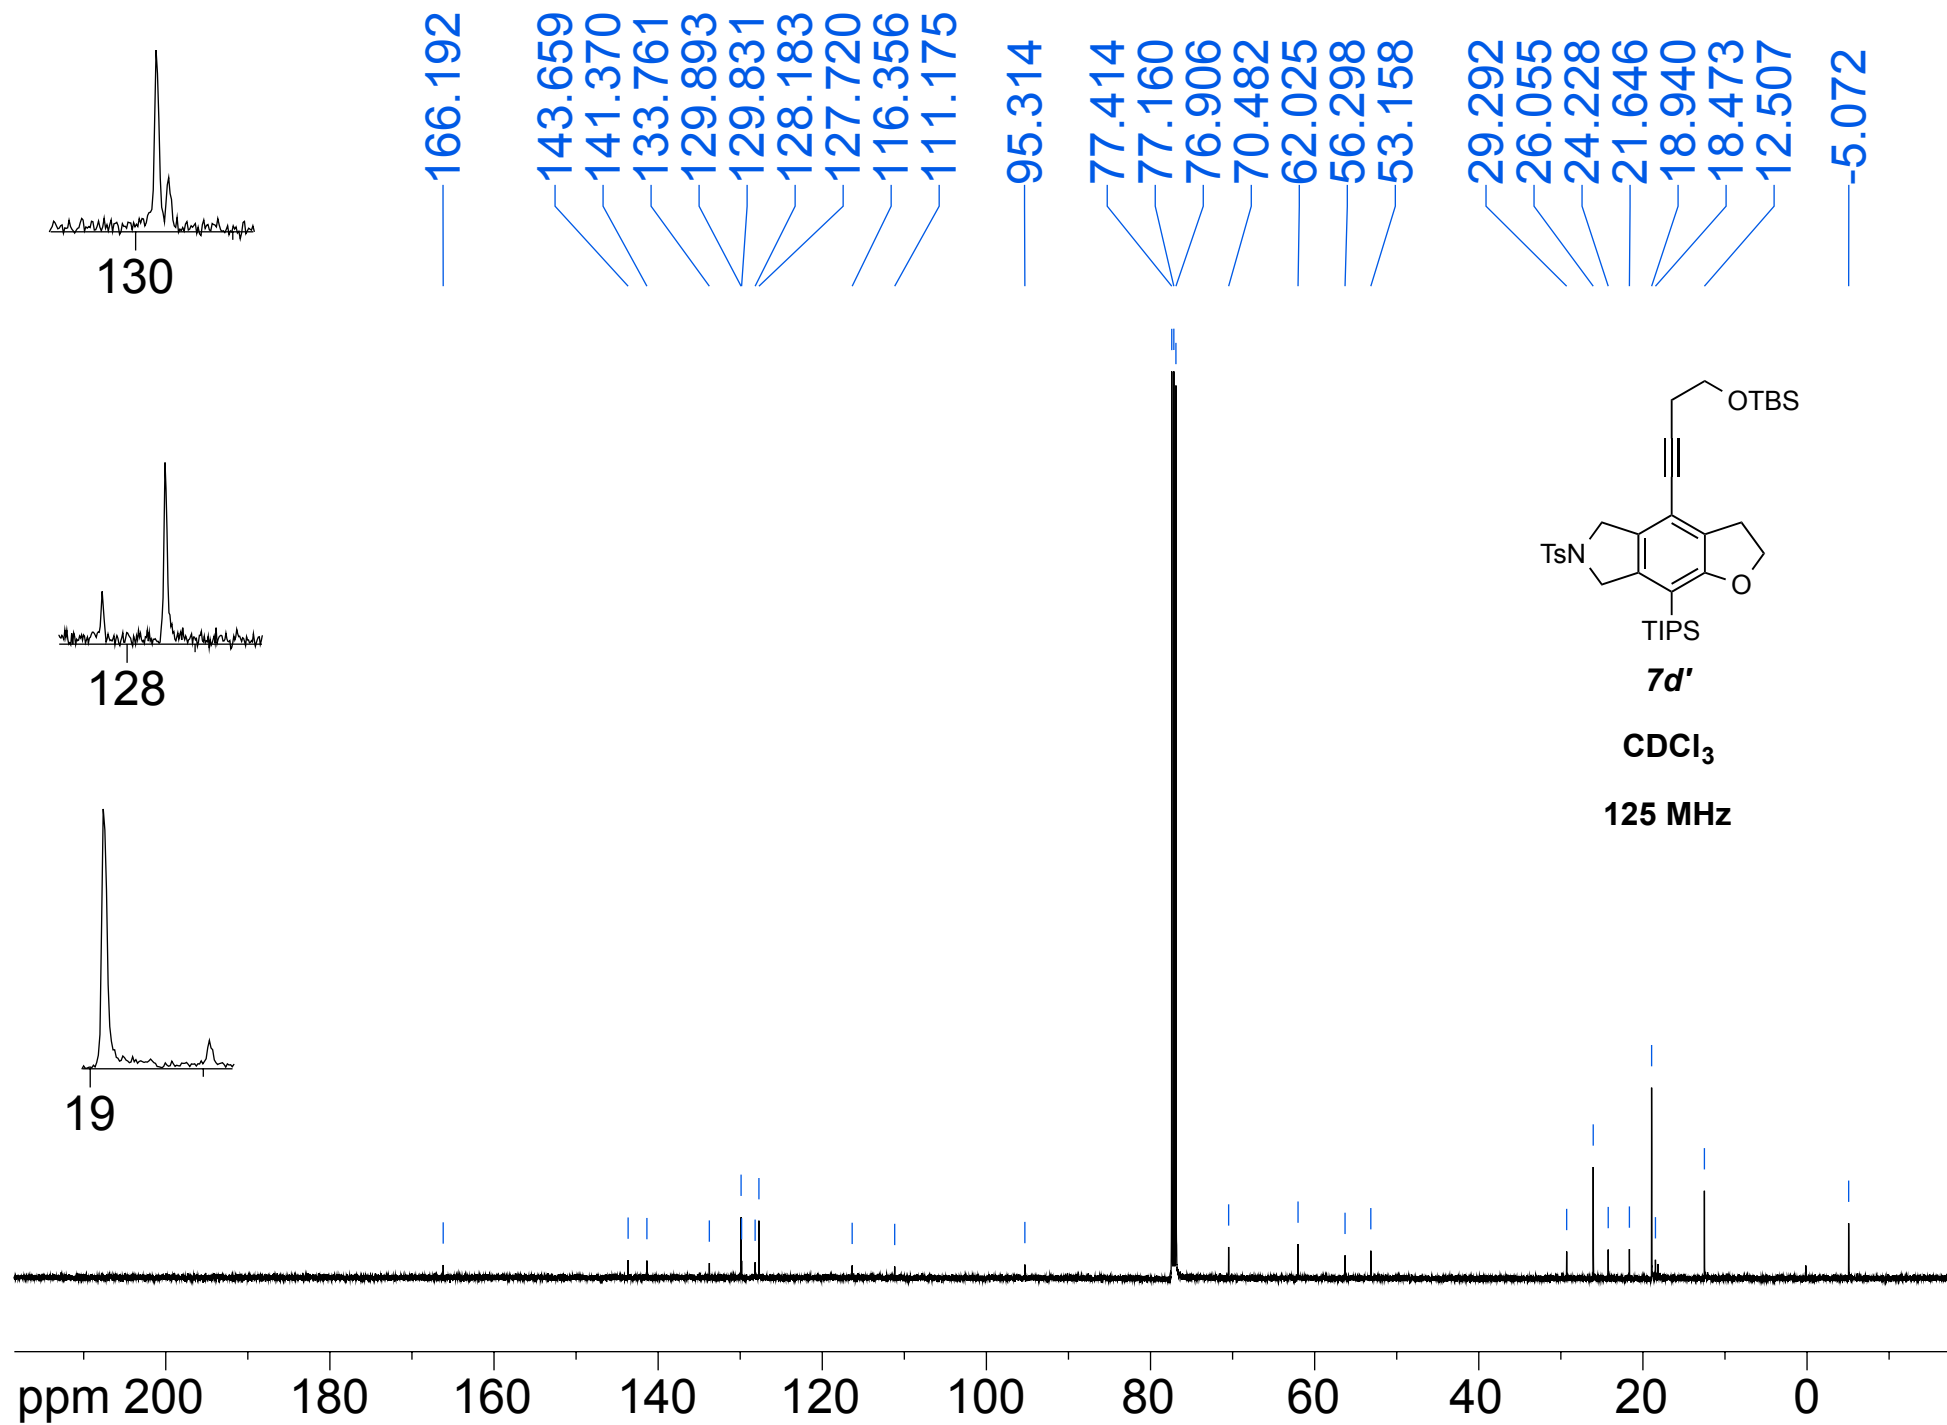



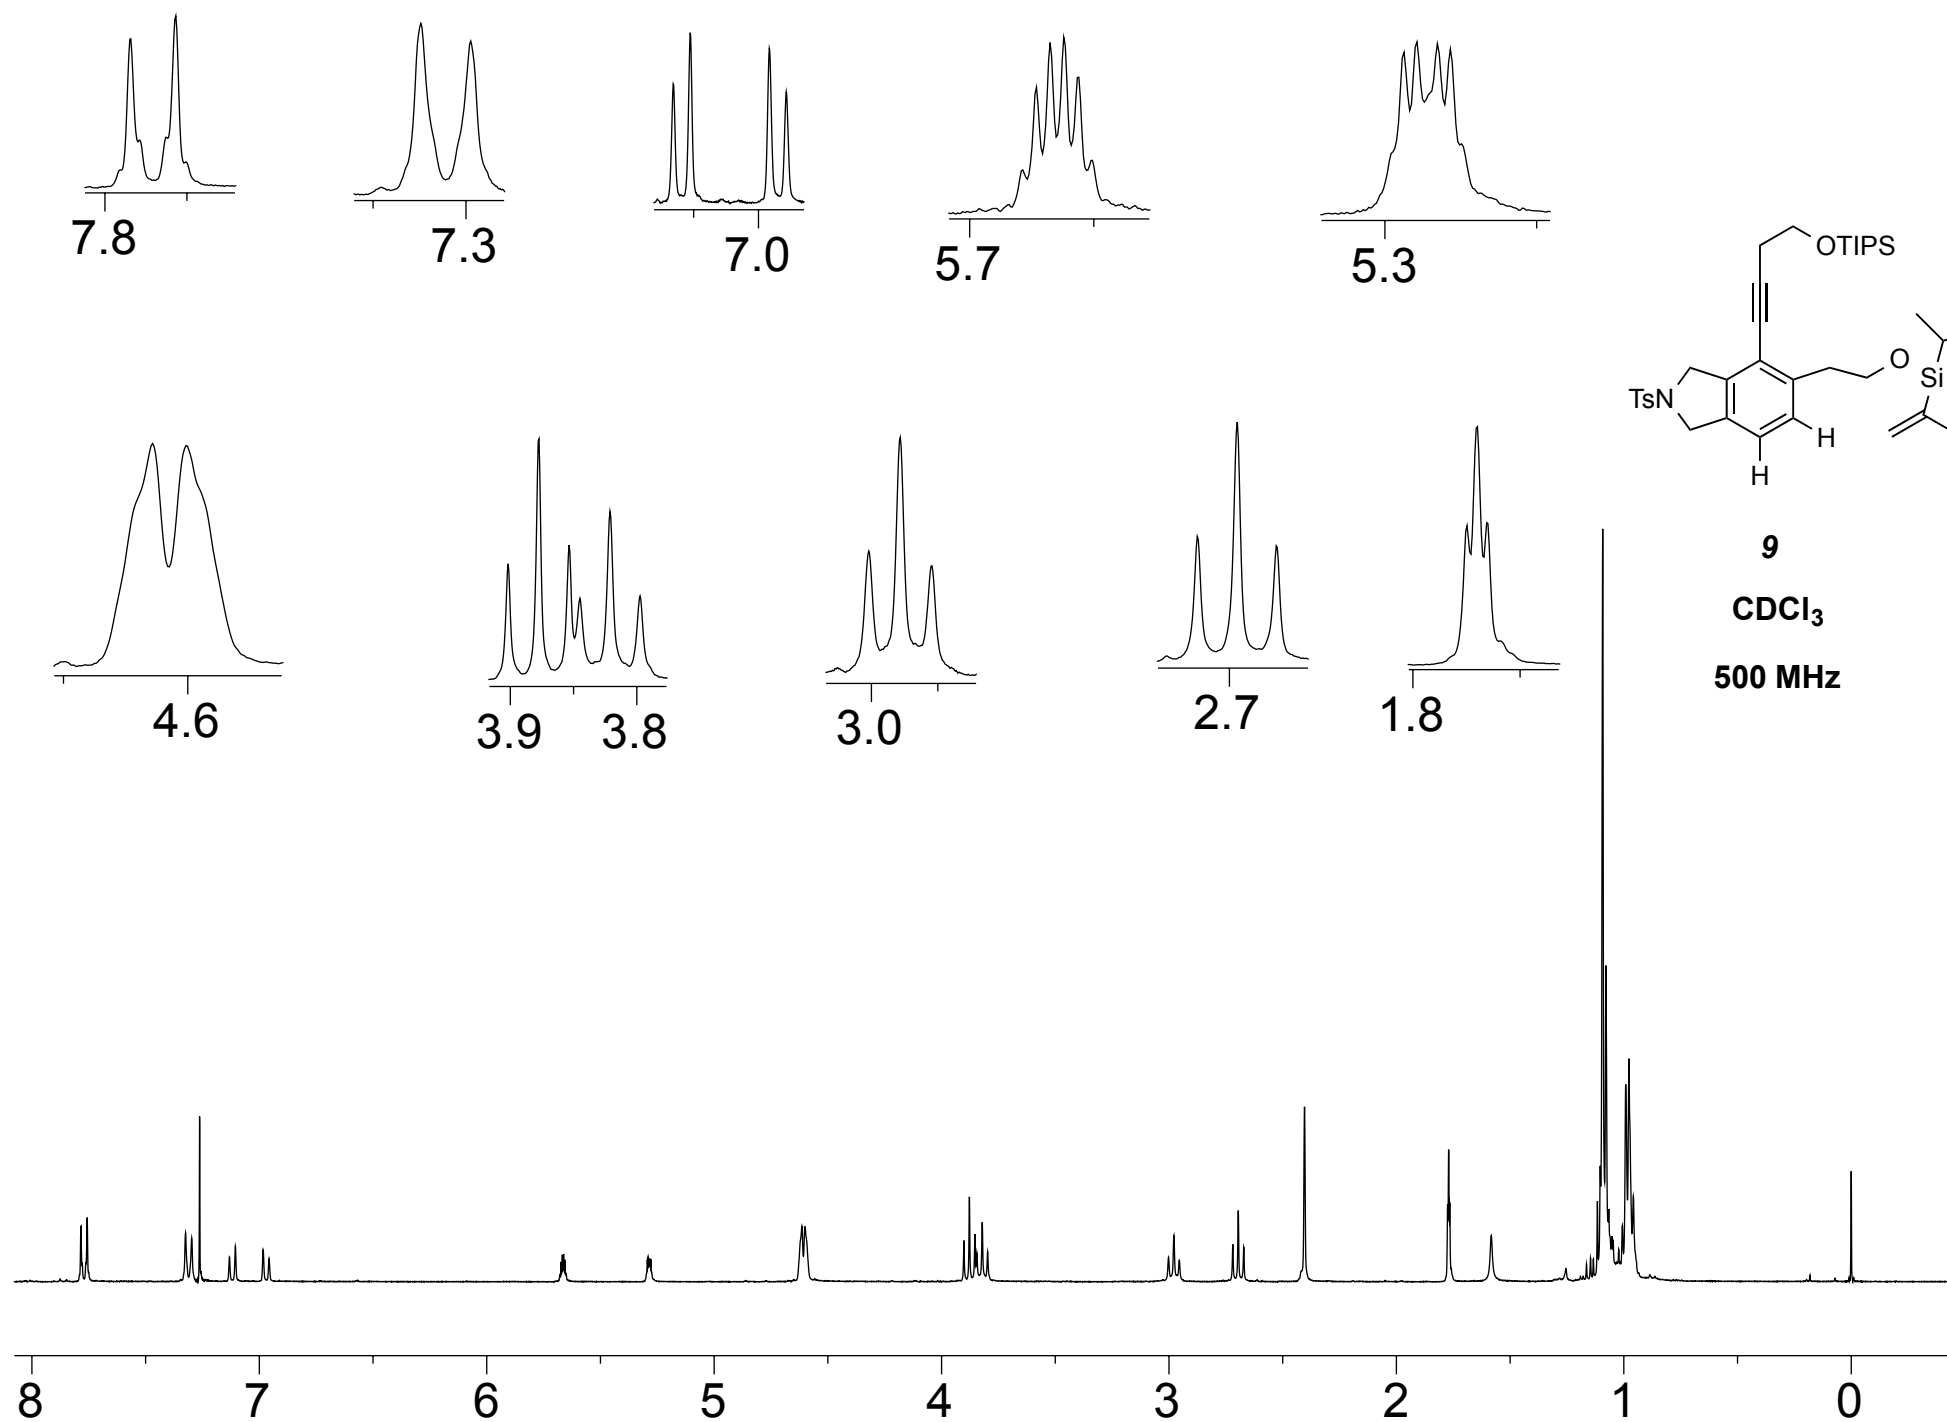

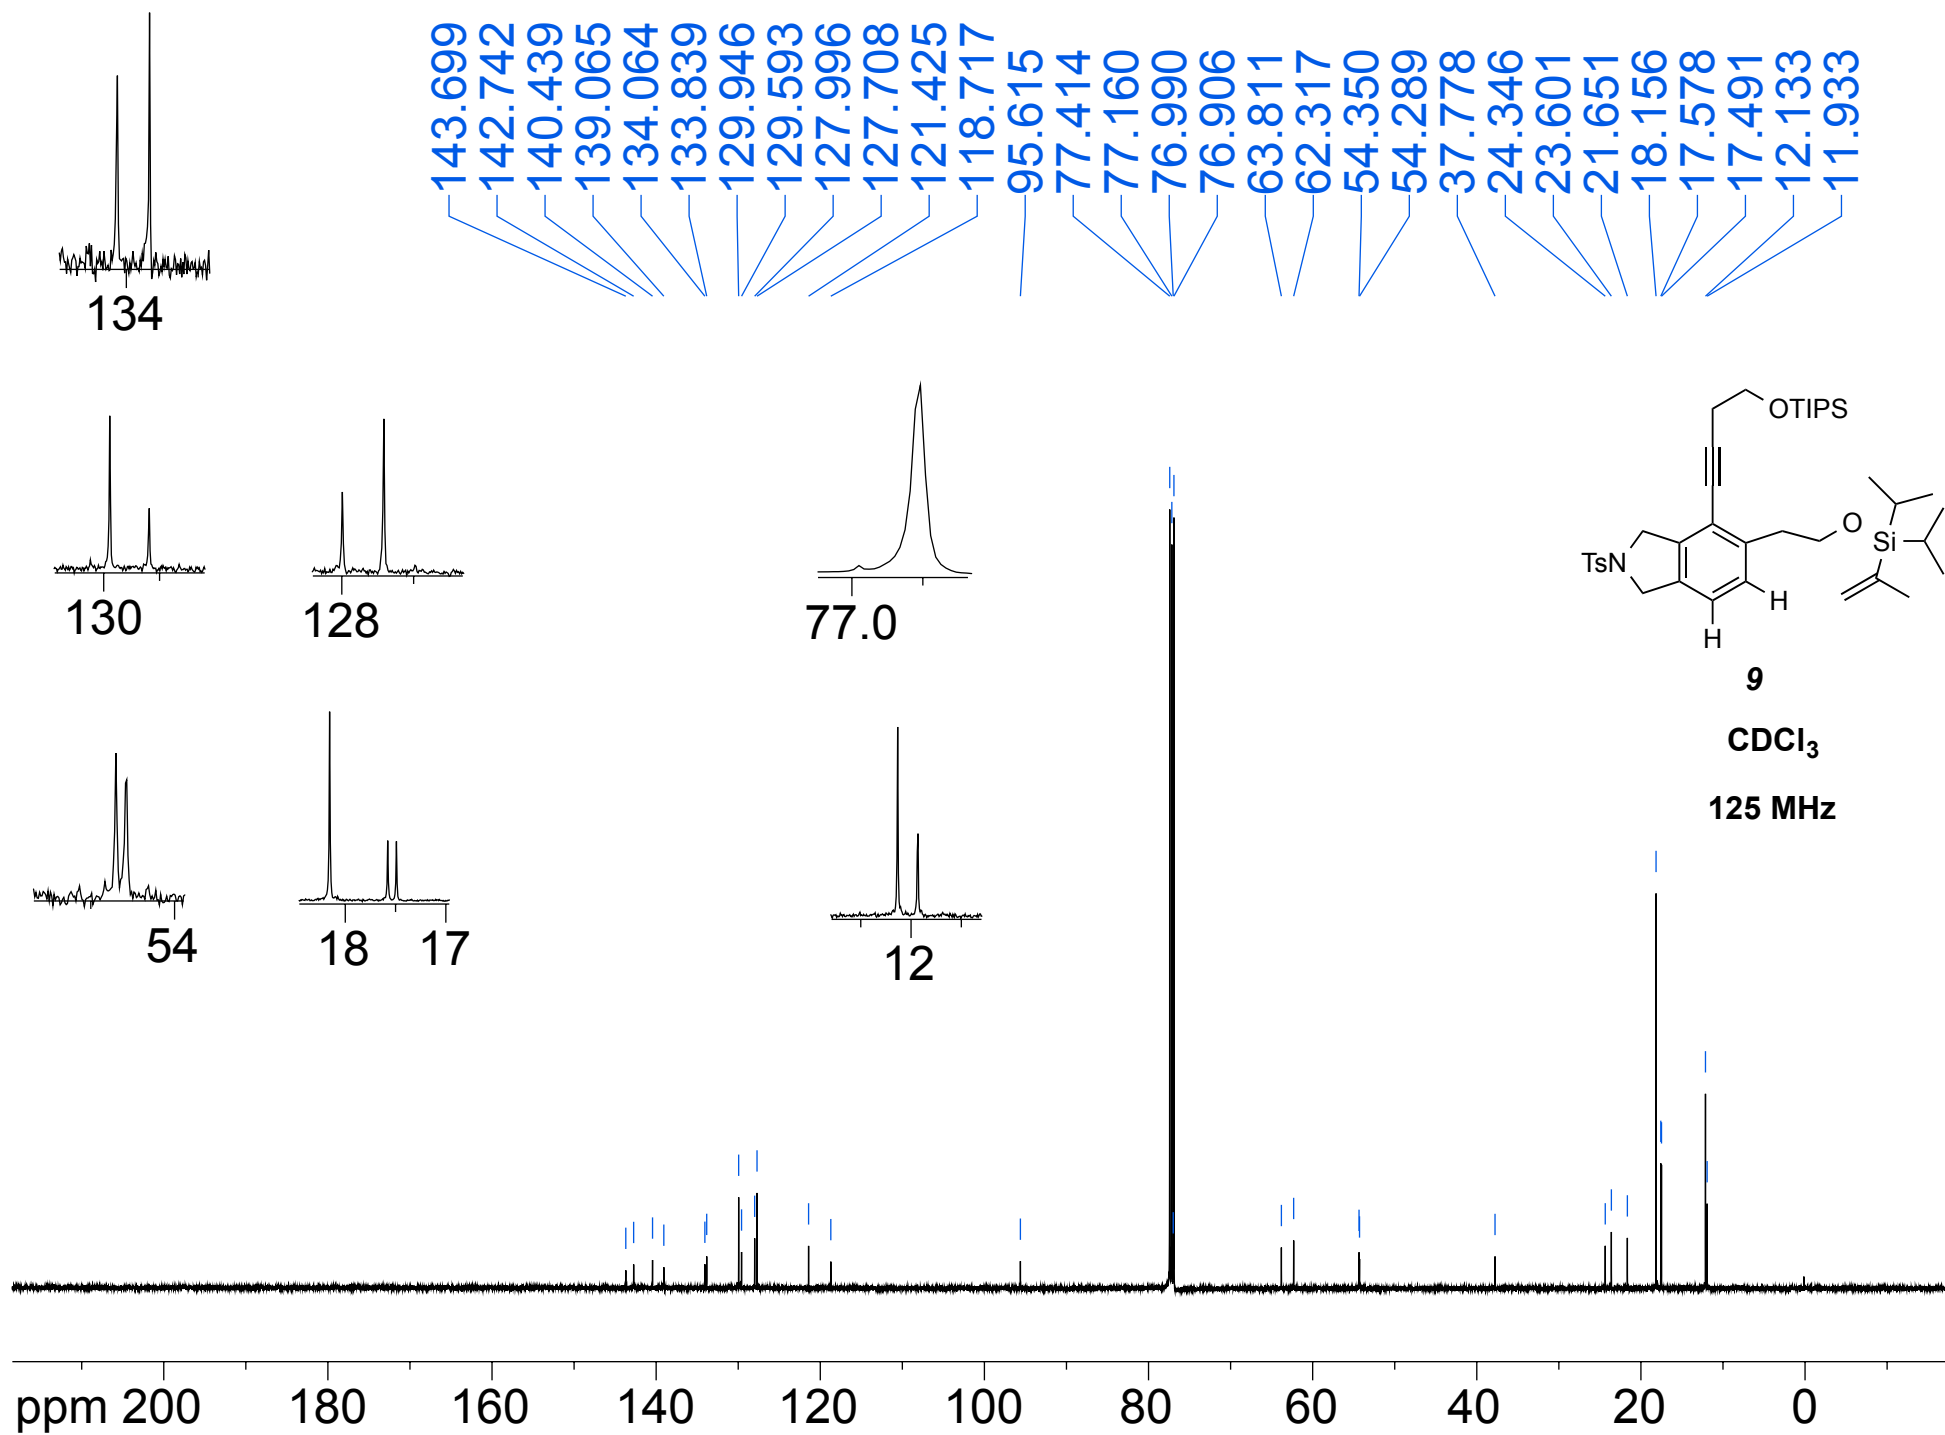

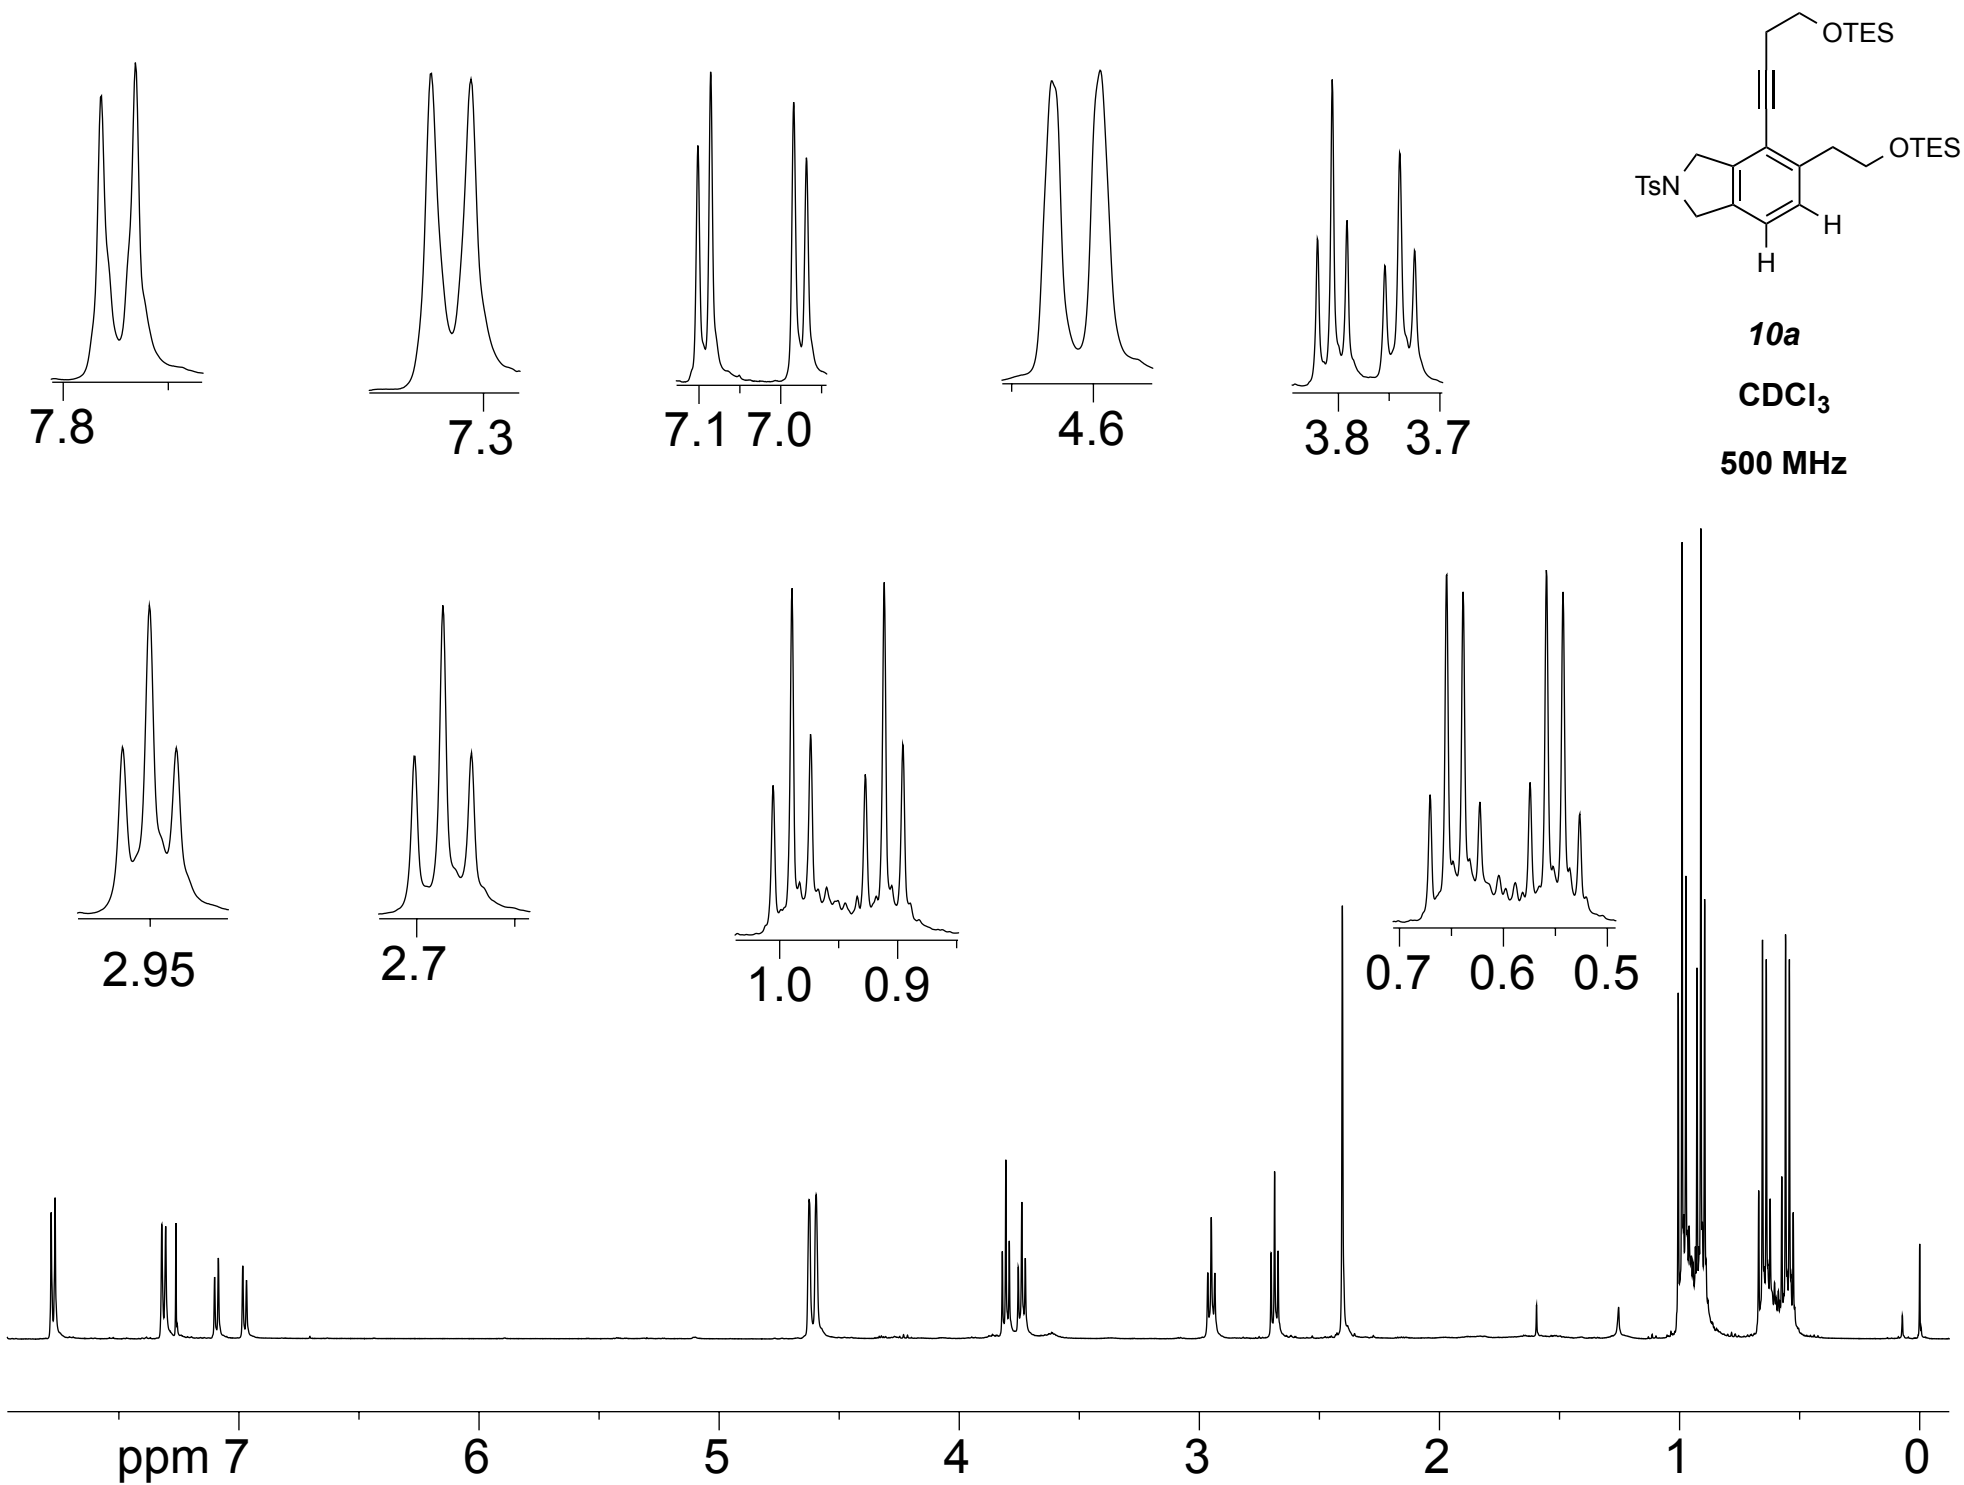

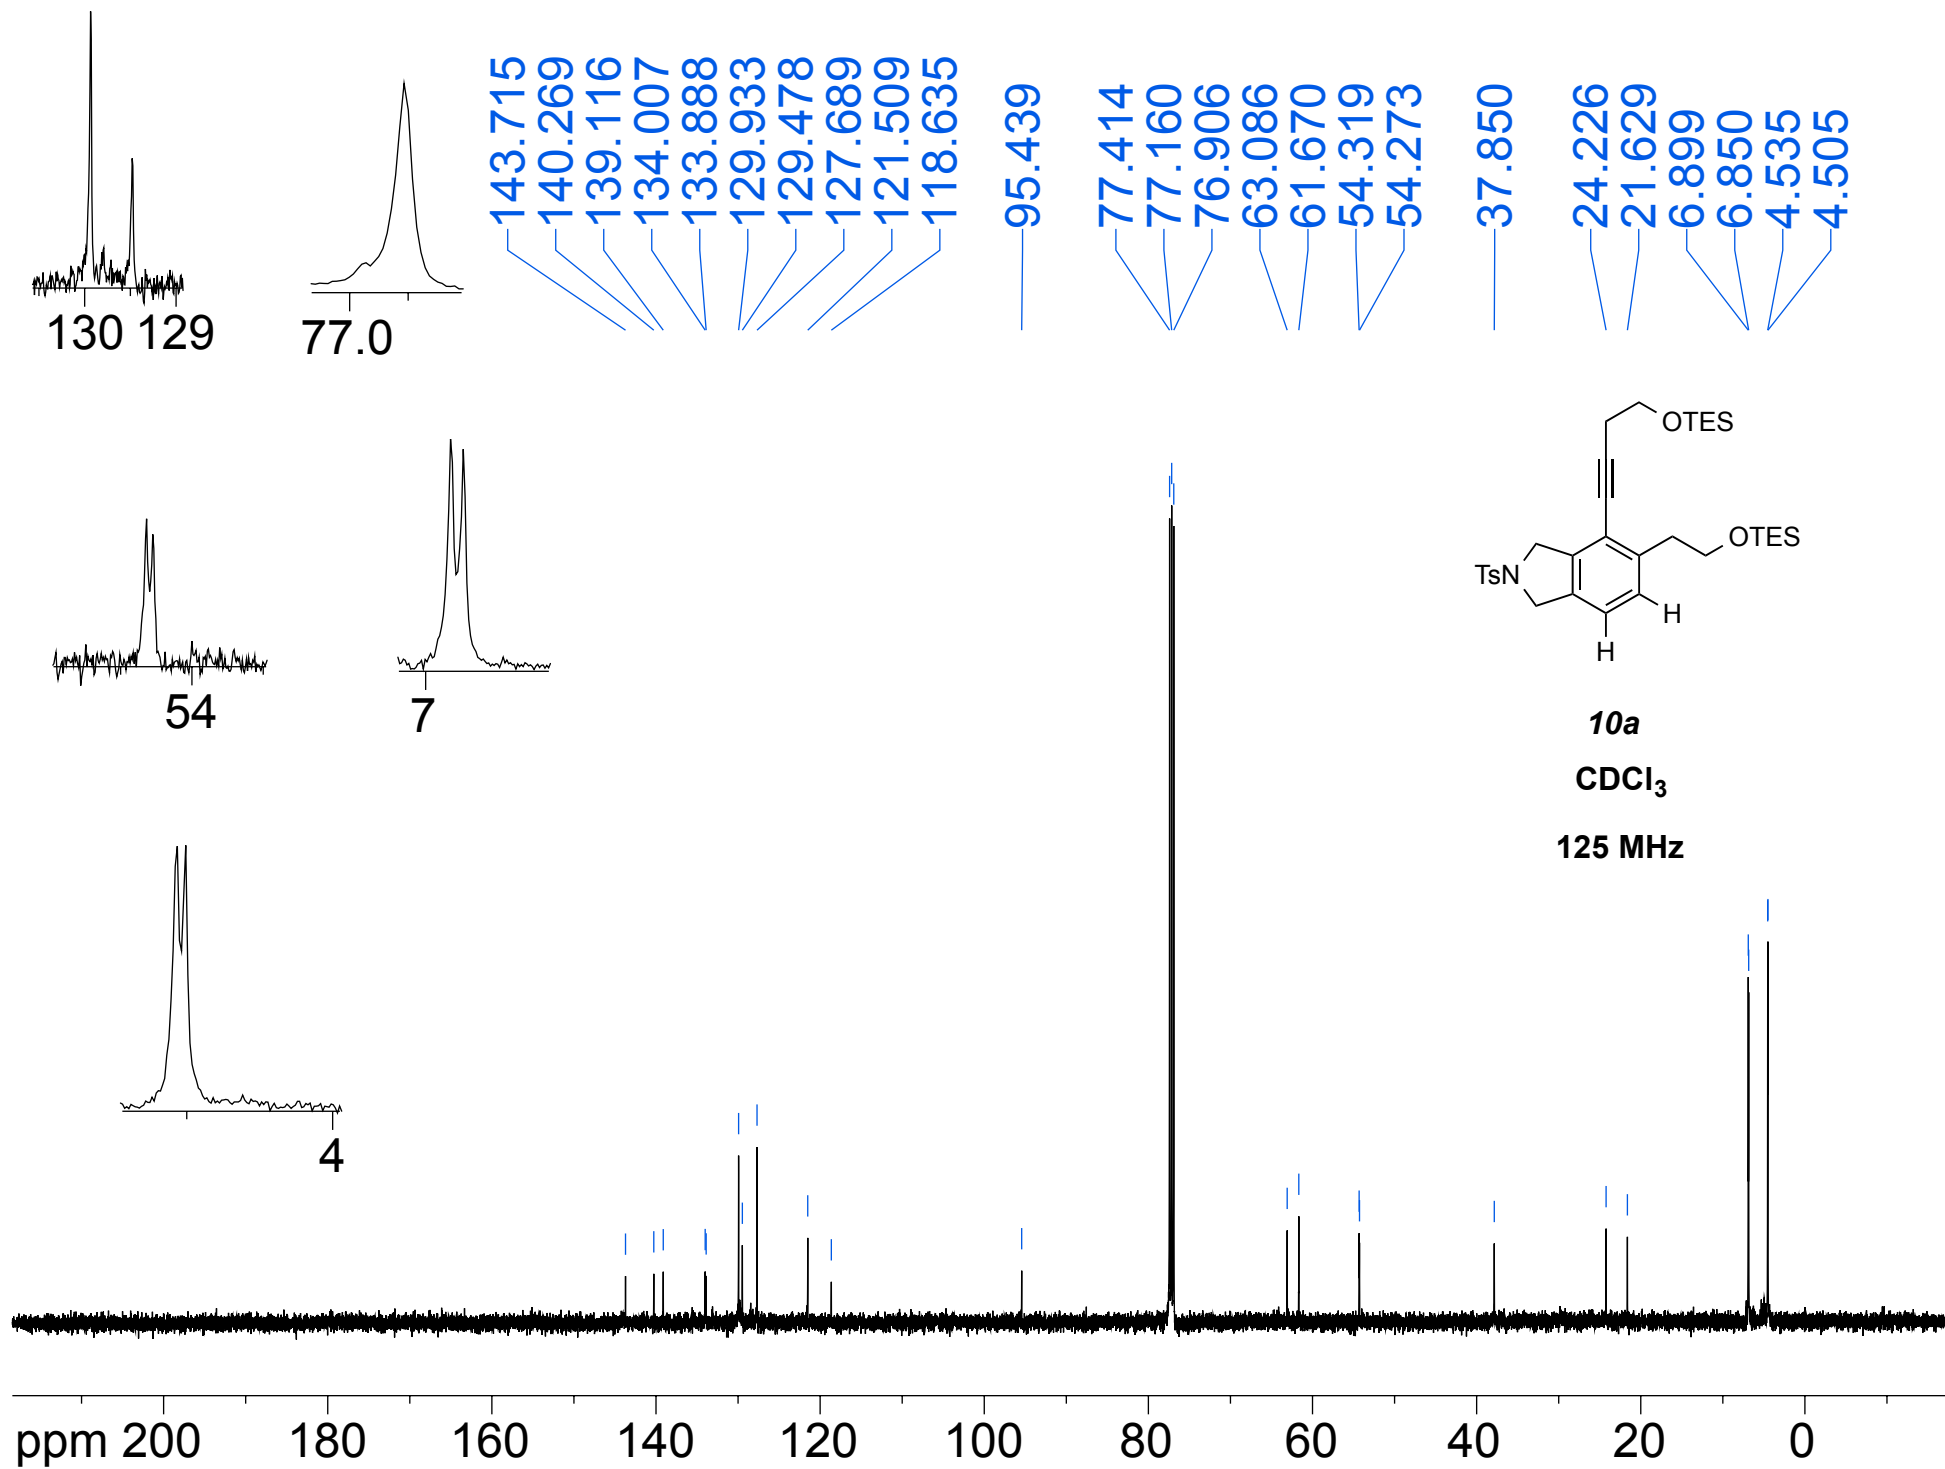

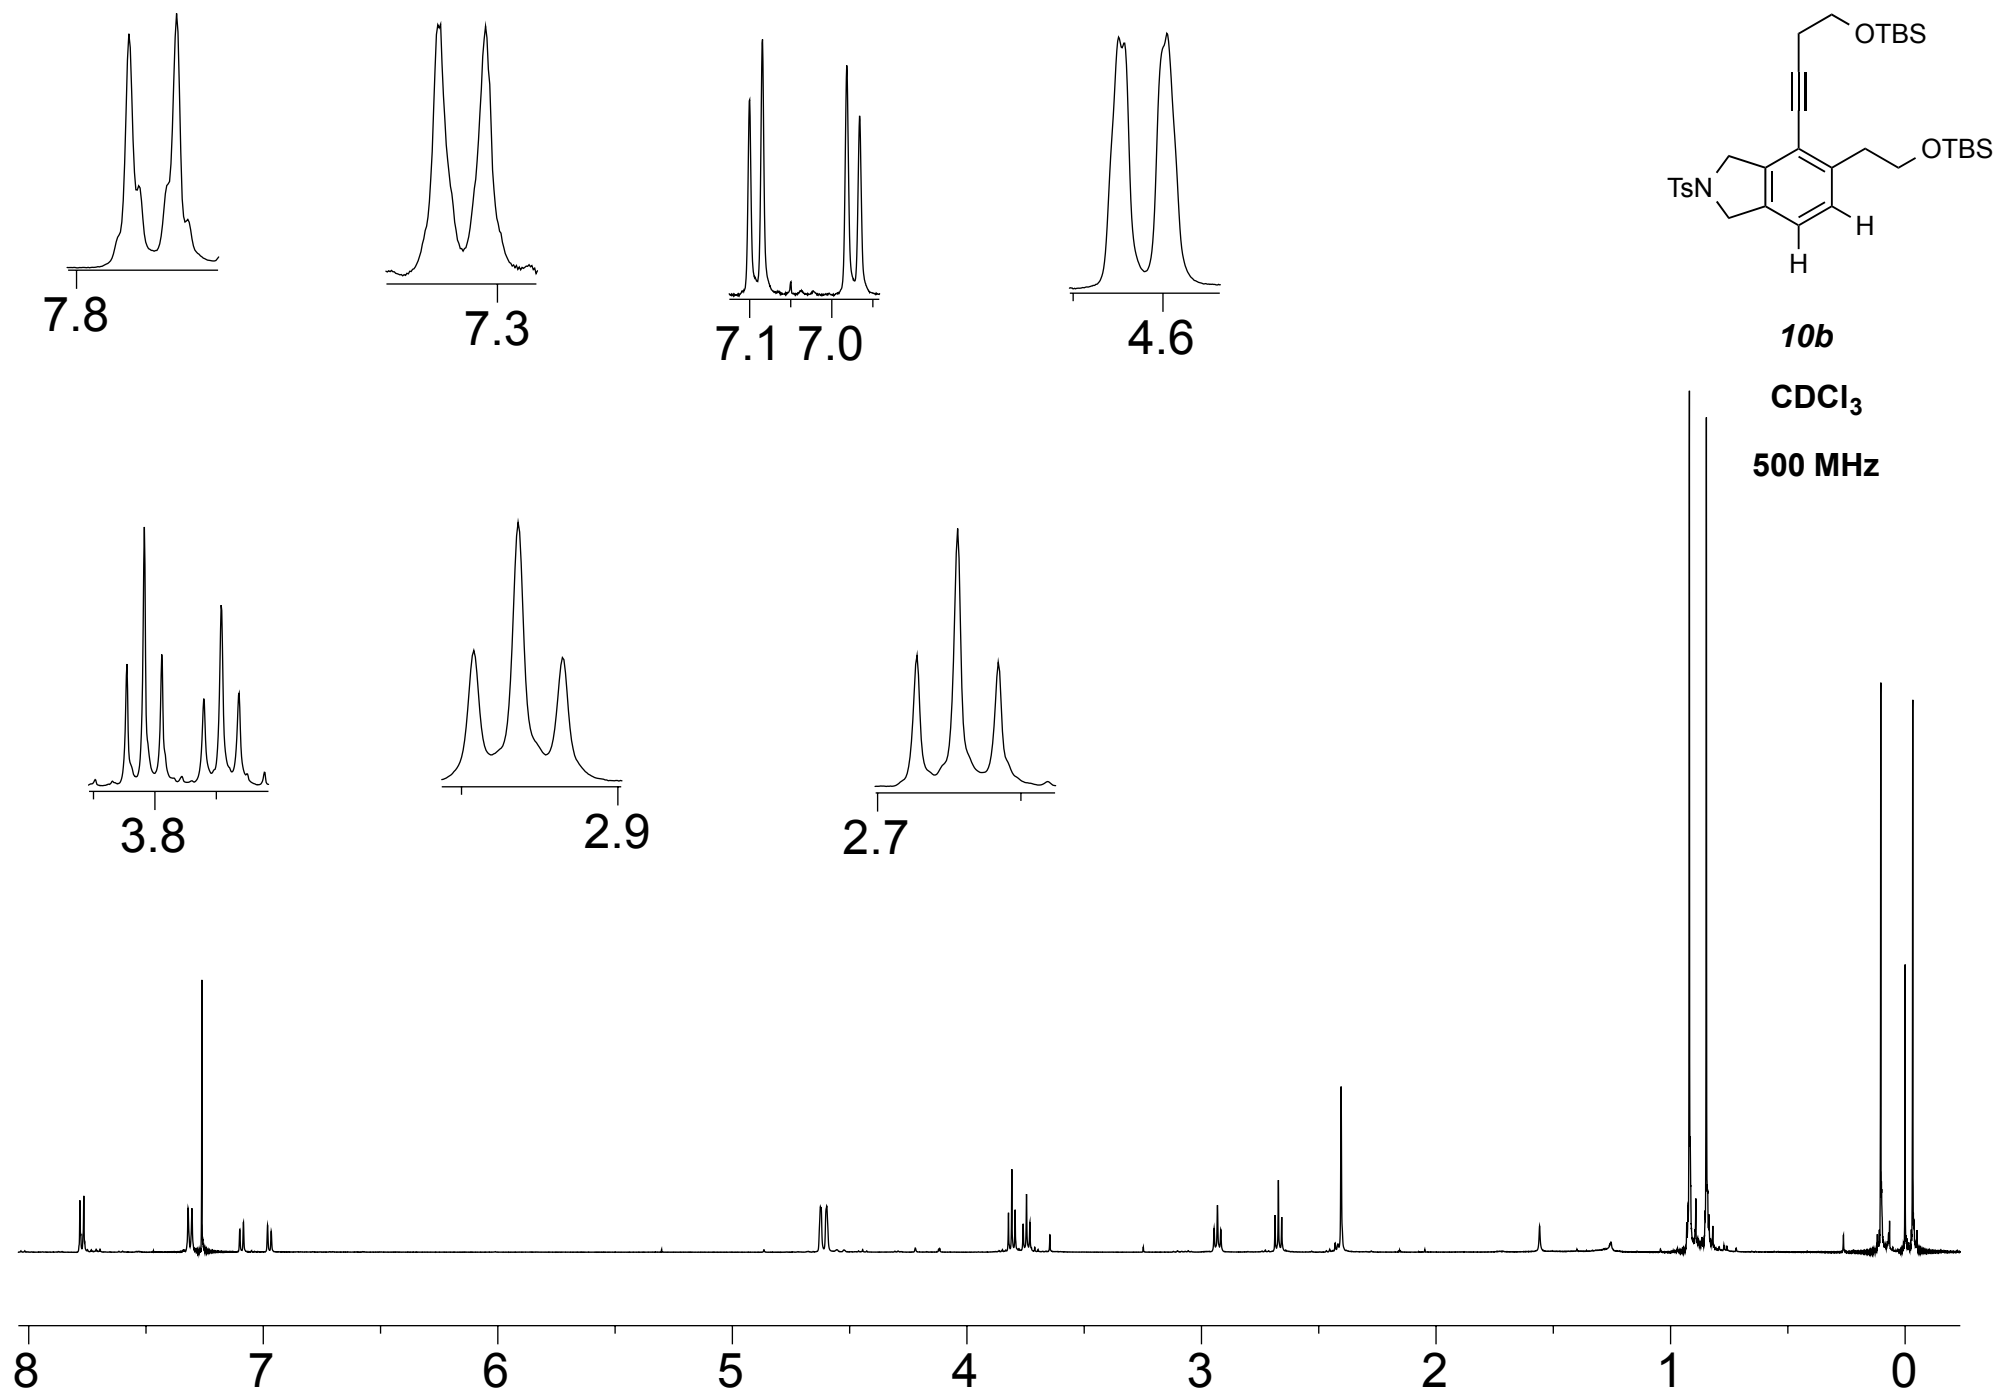

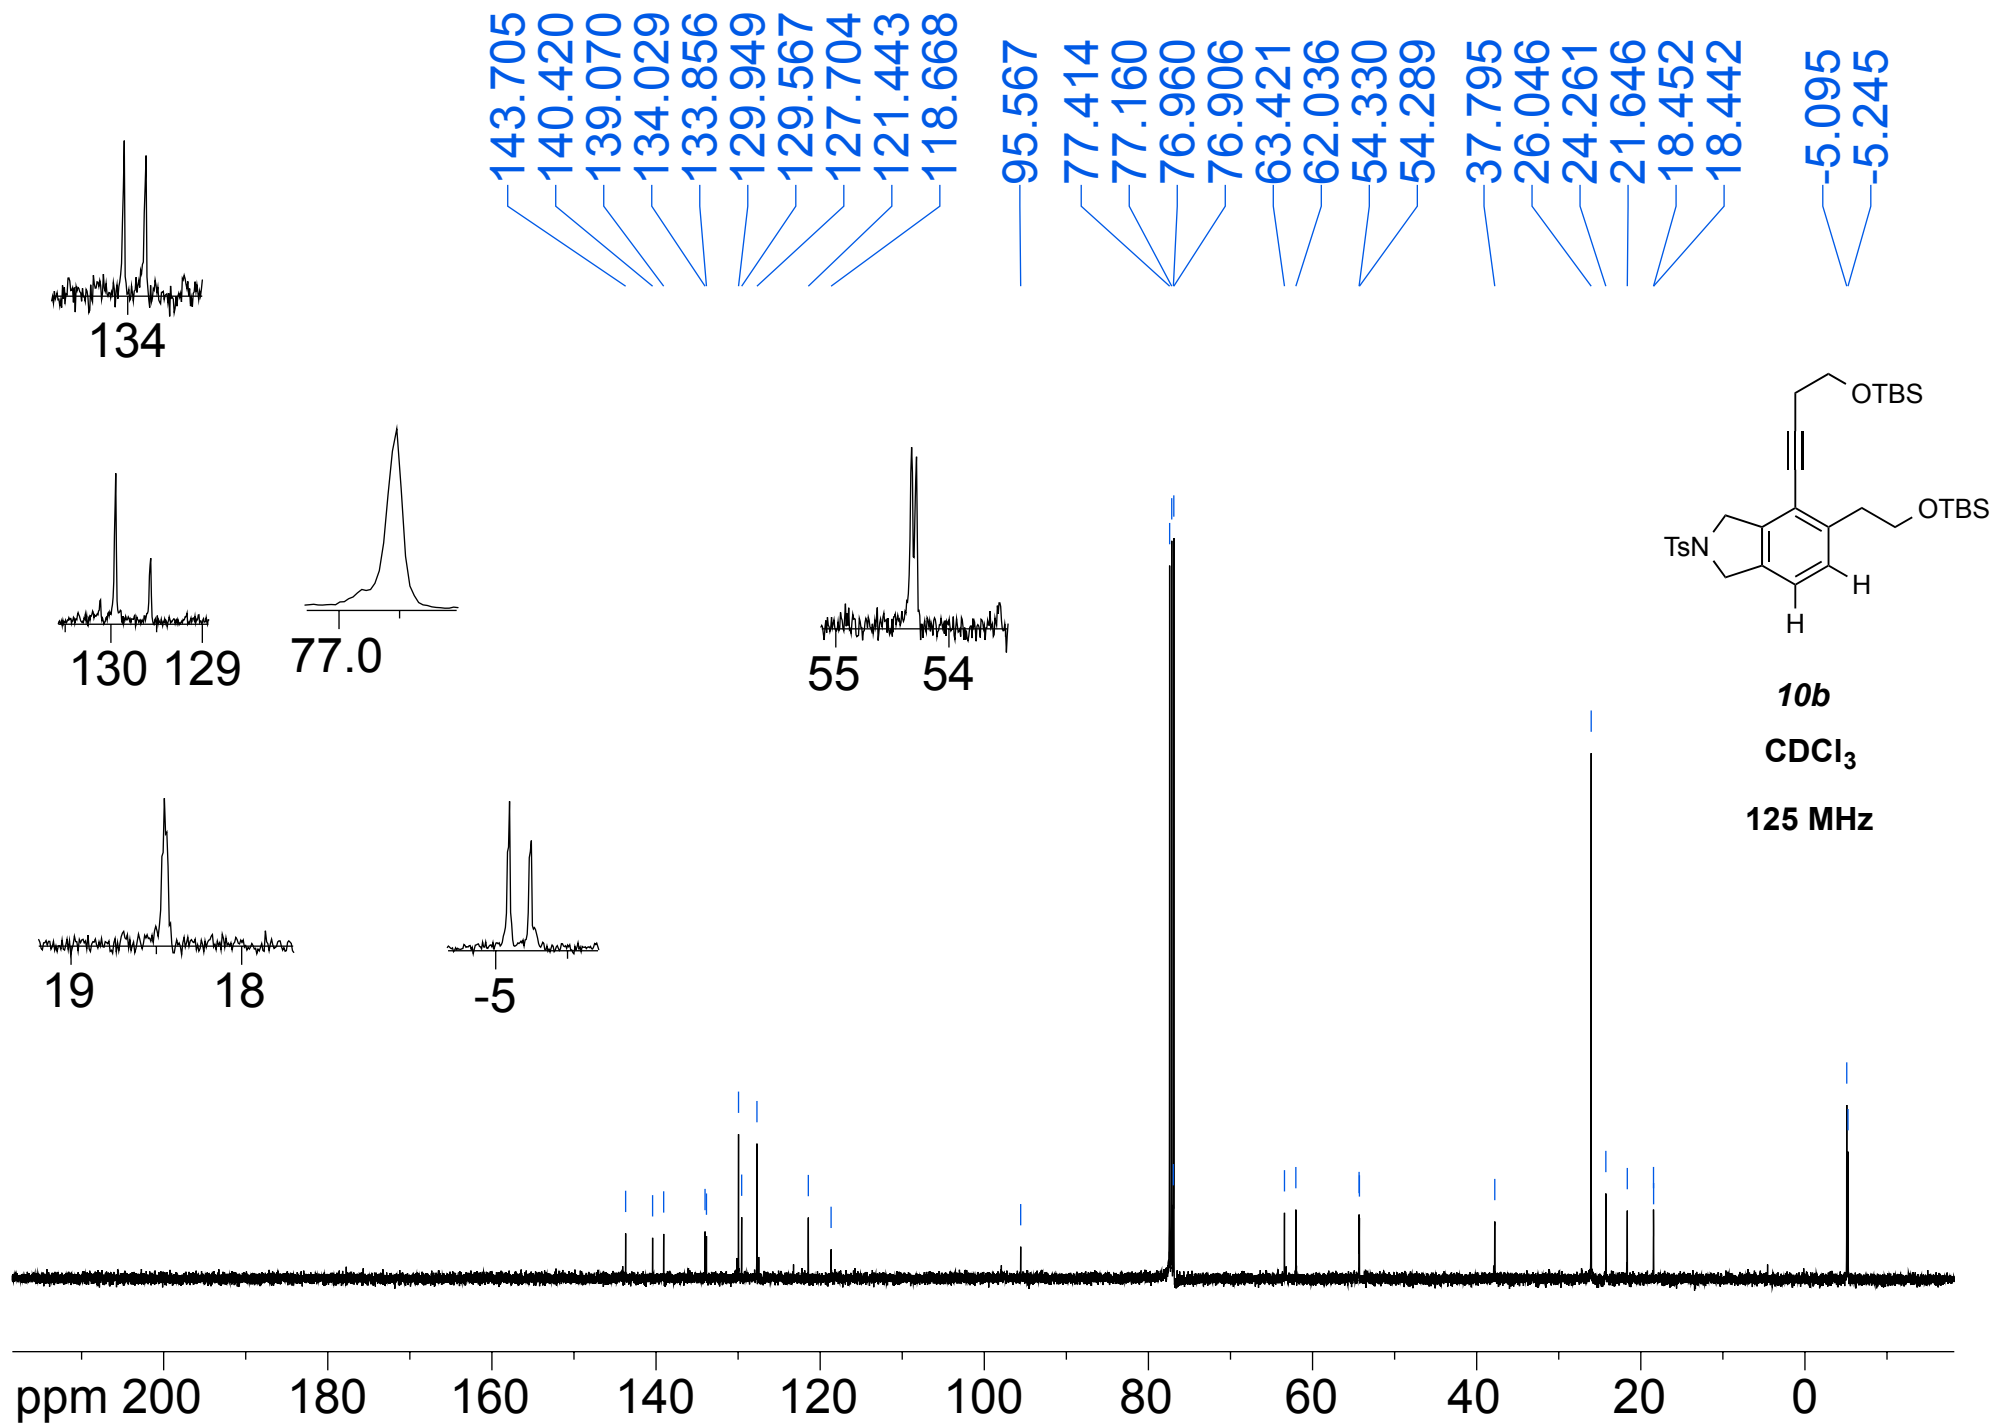

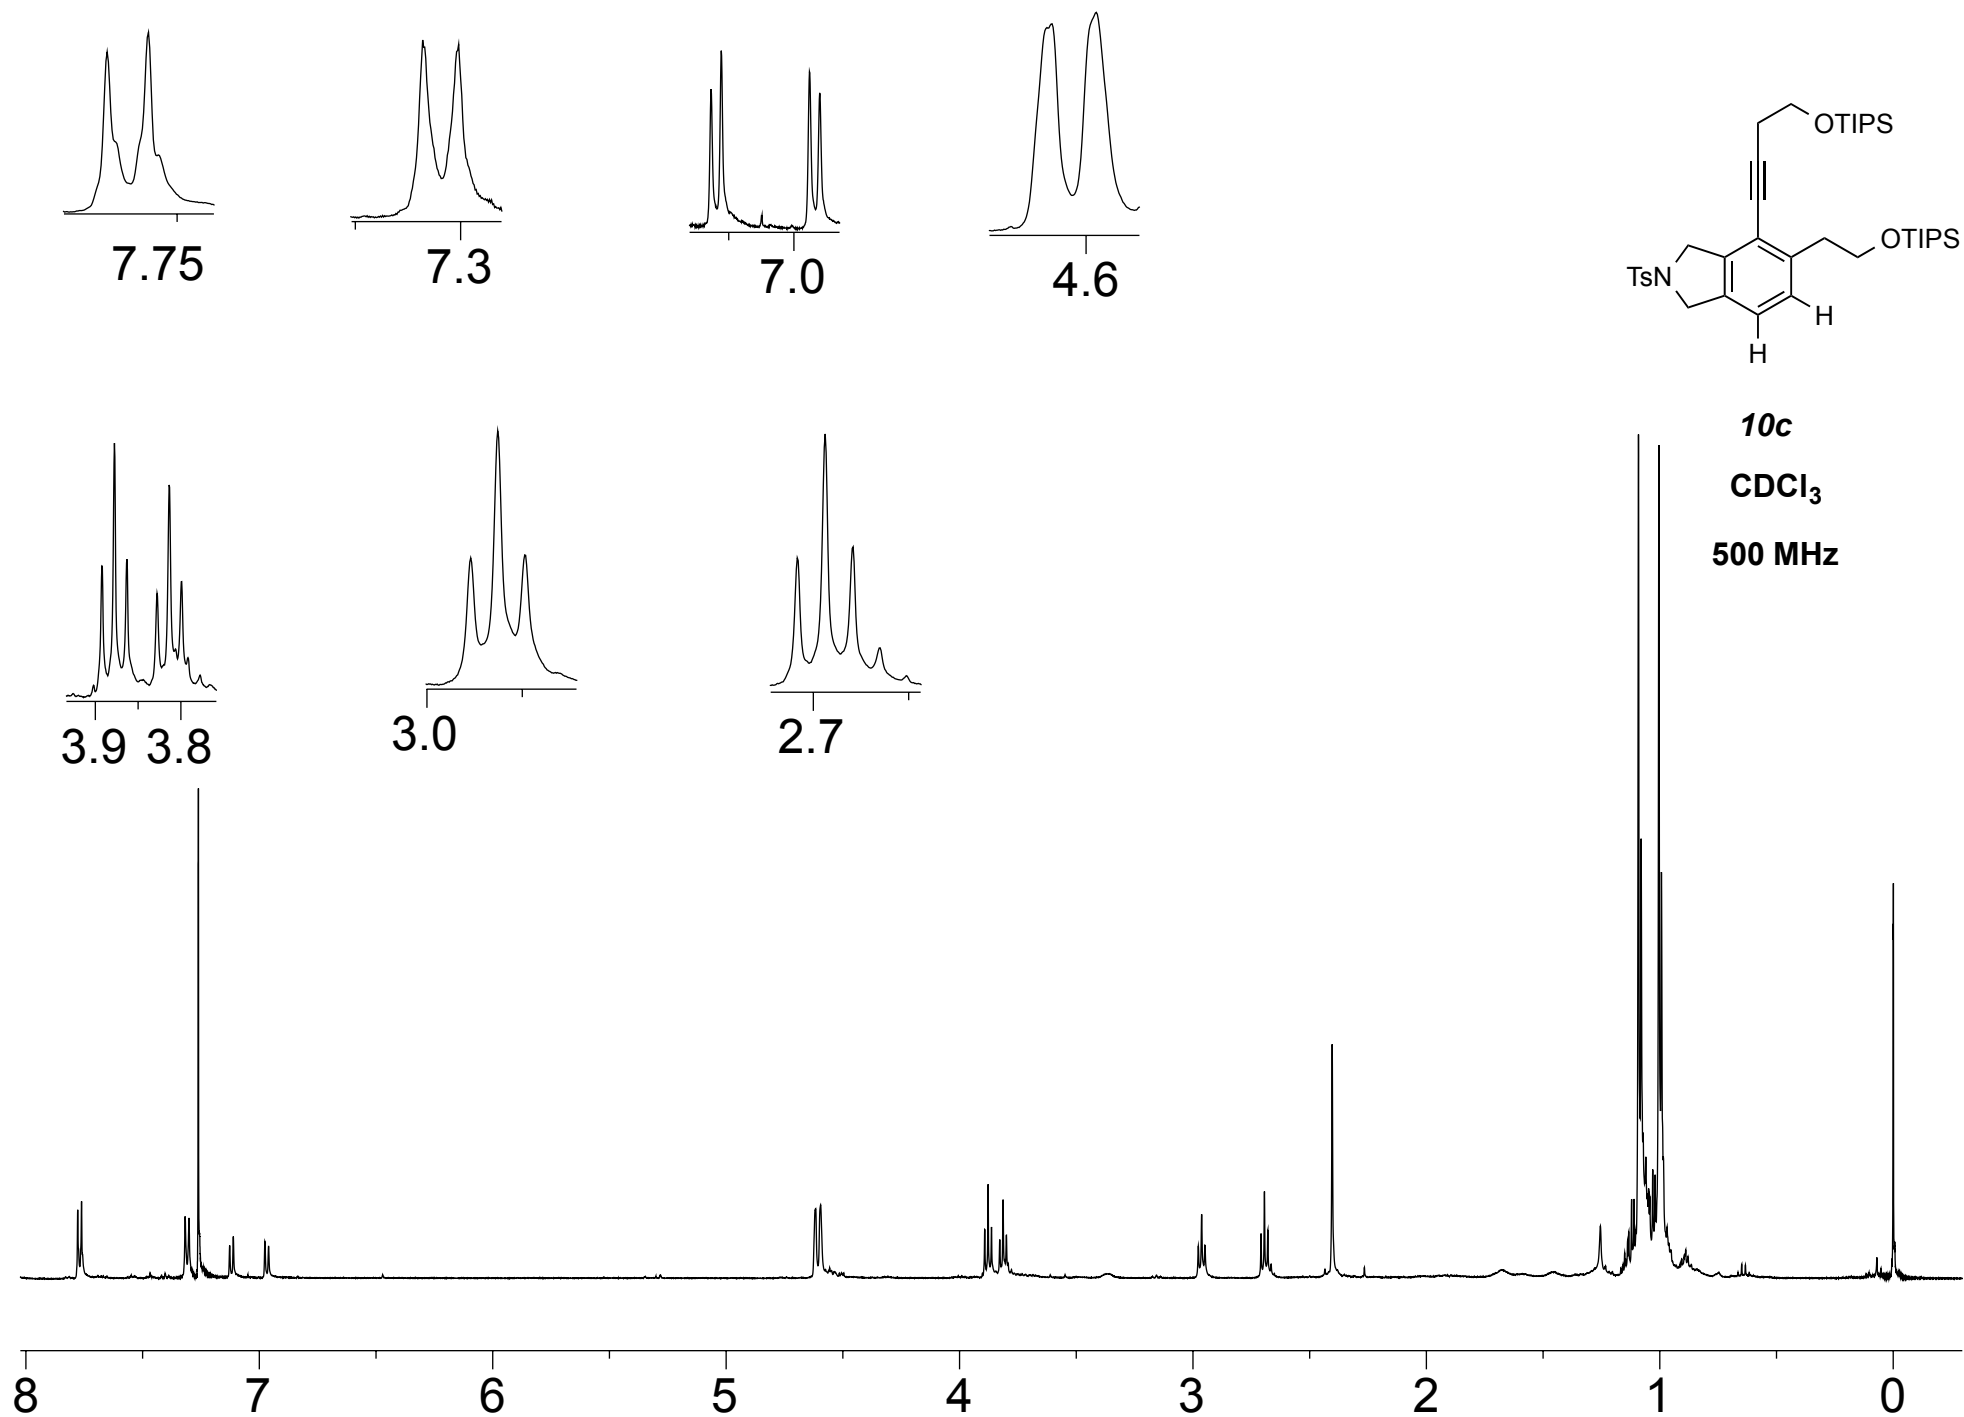

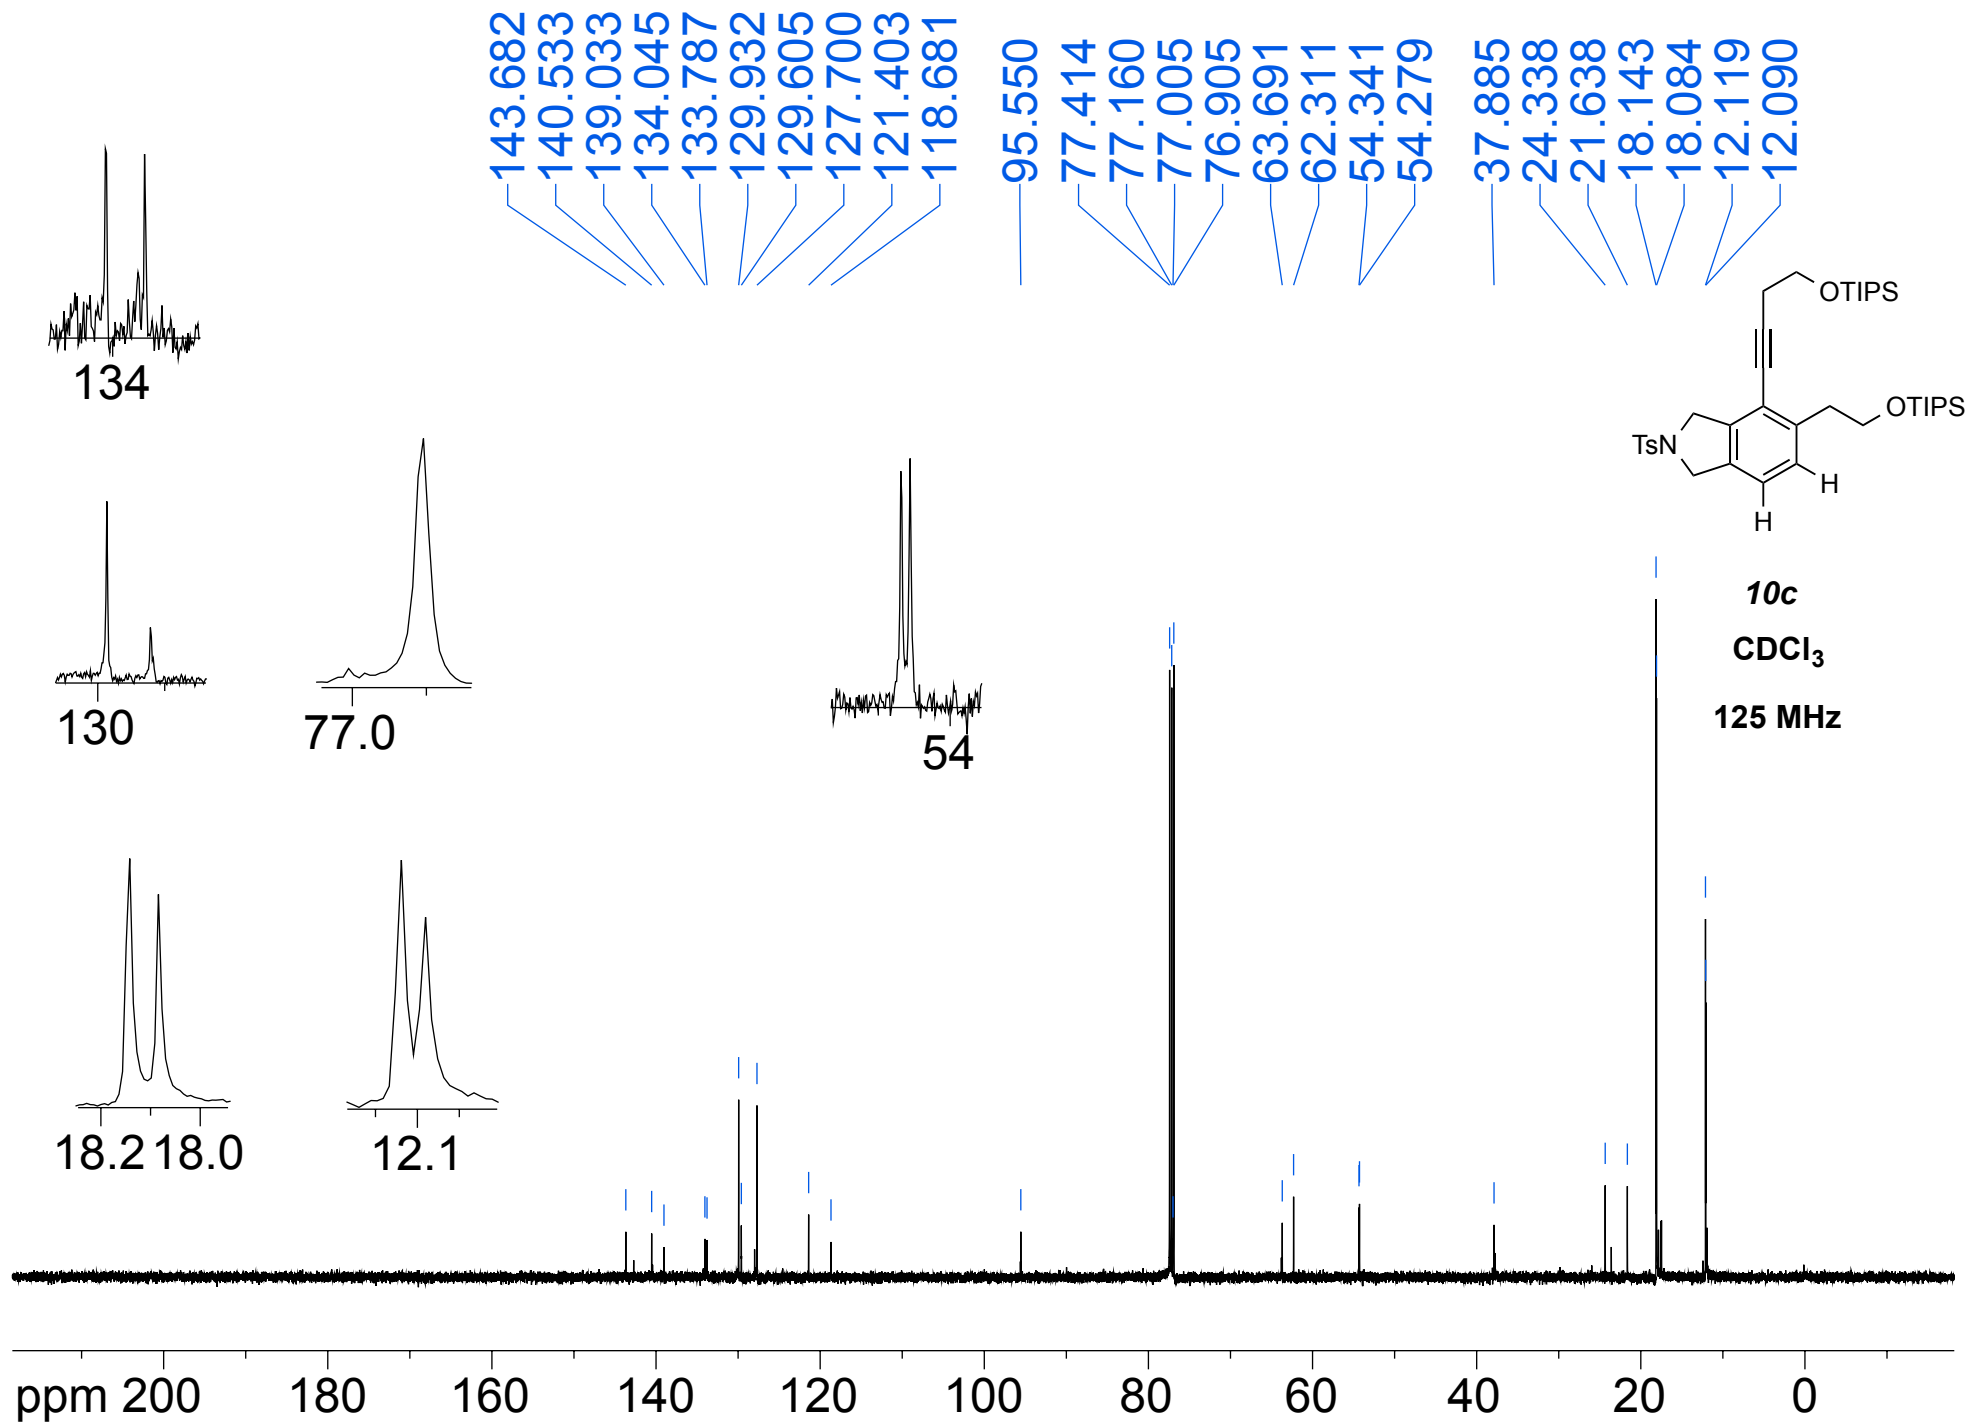



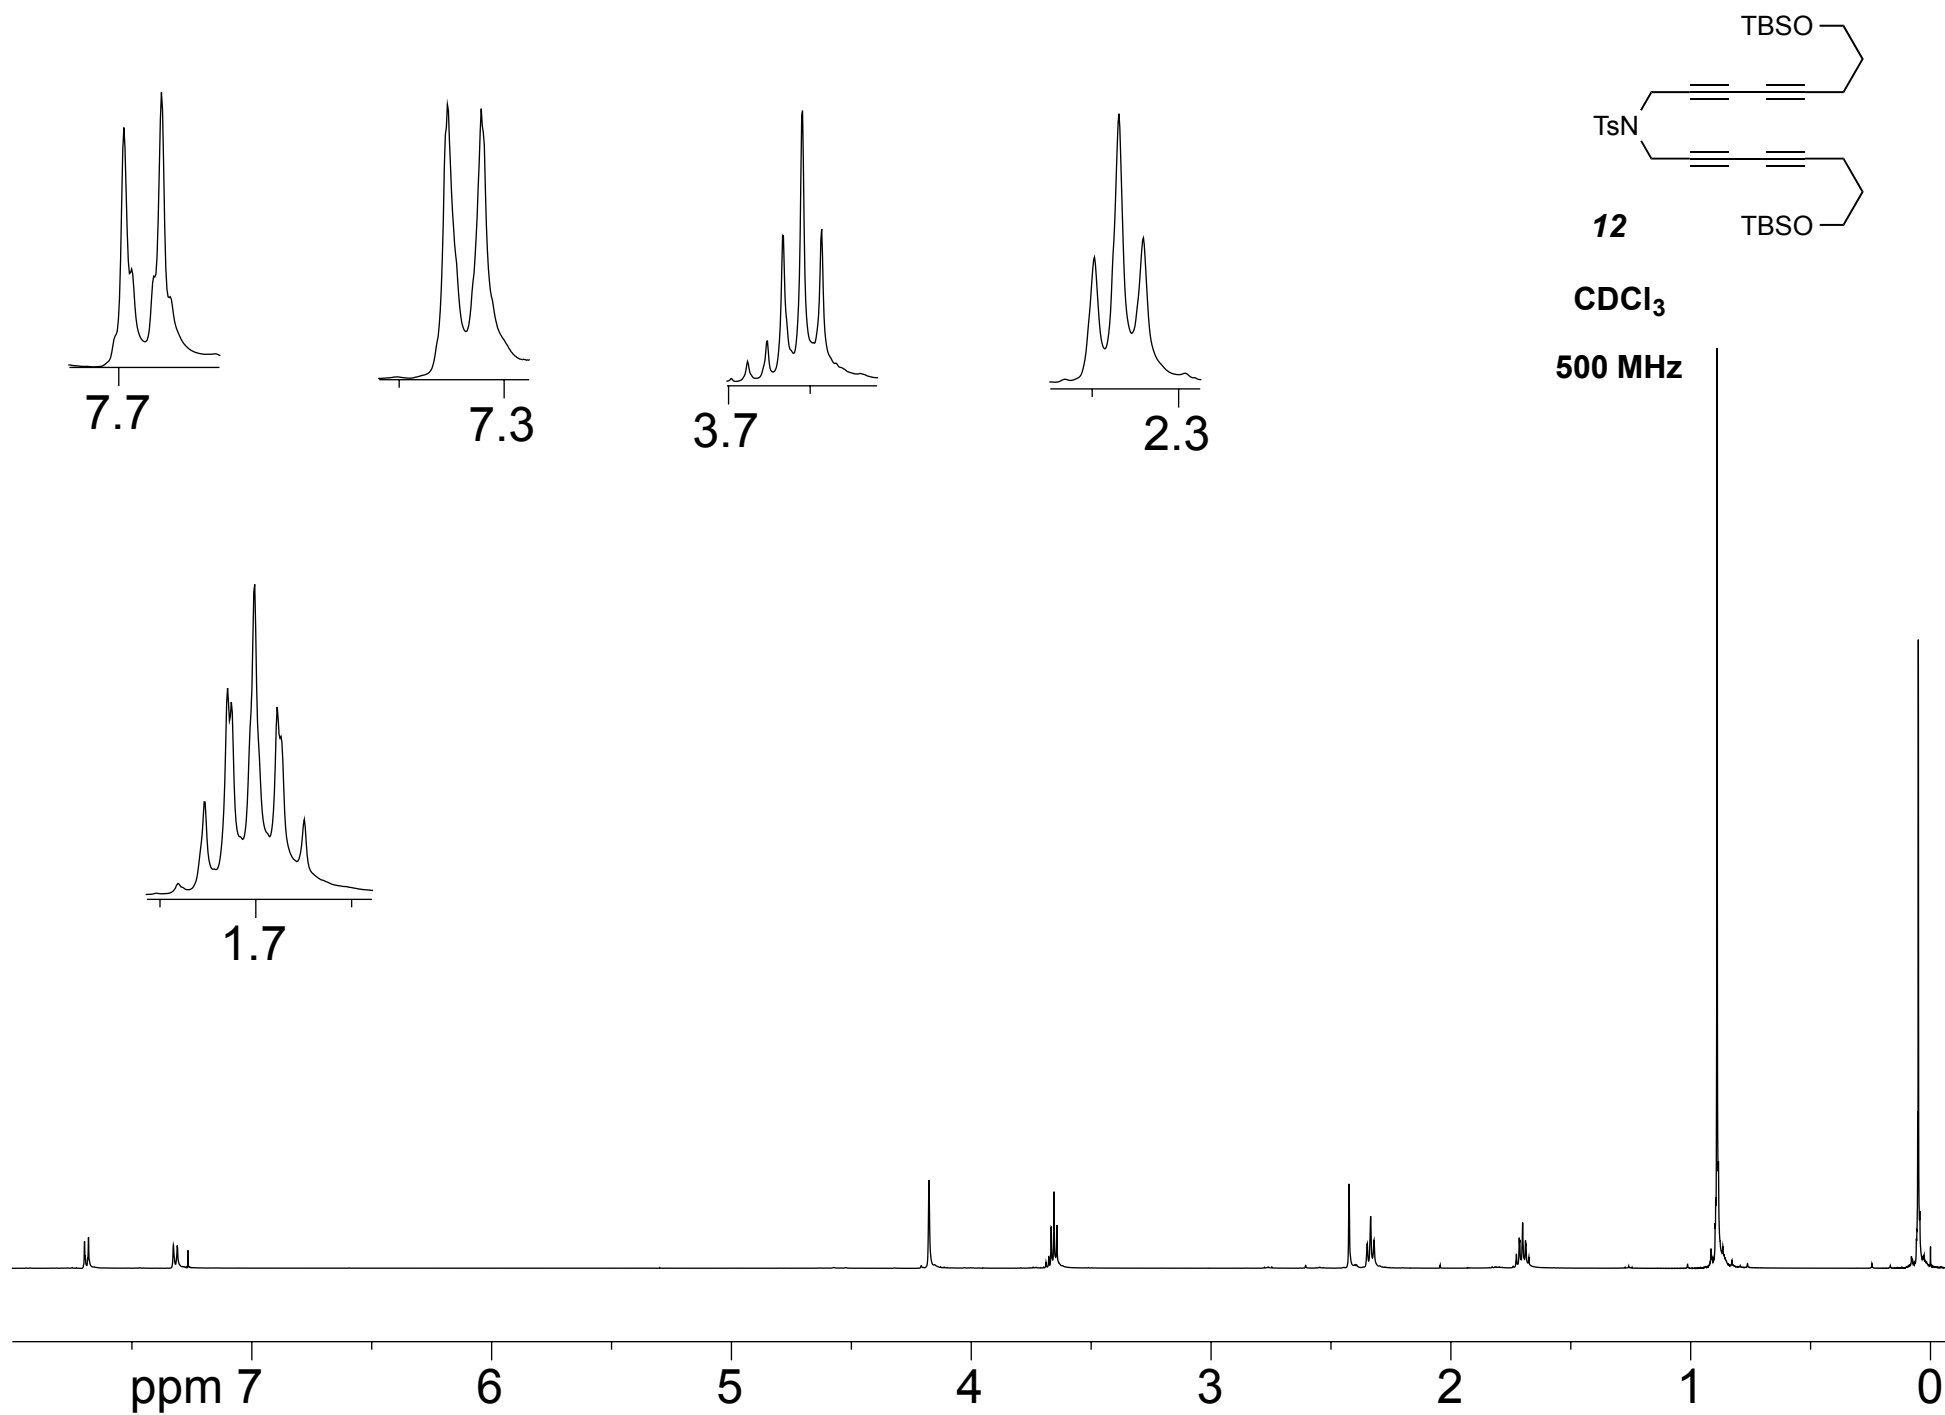

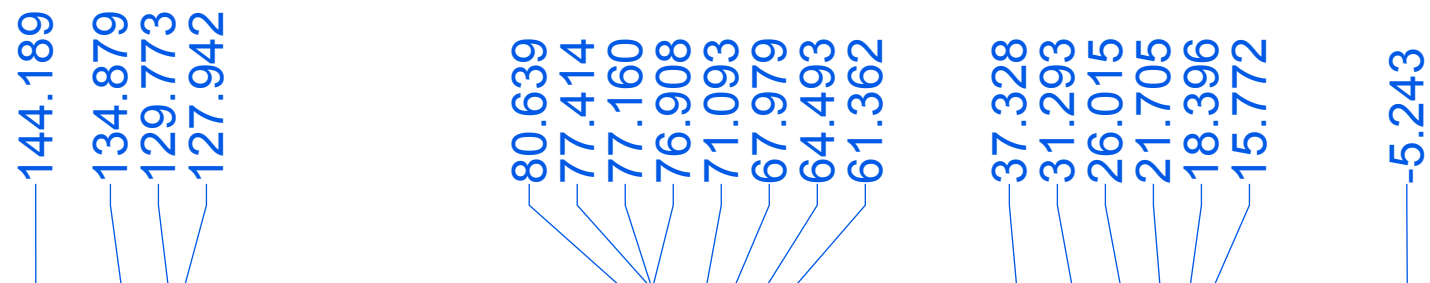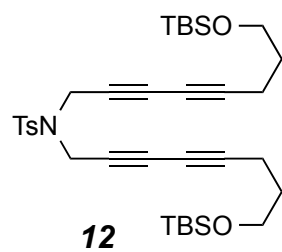

$\text{CDCl}_3$

125 MHz

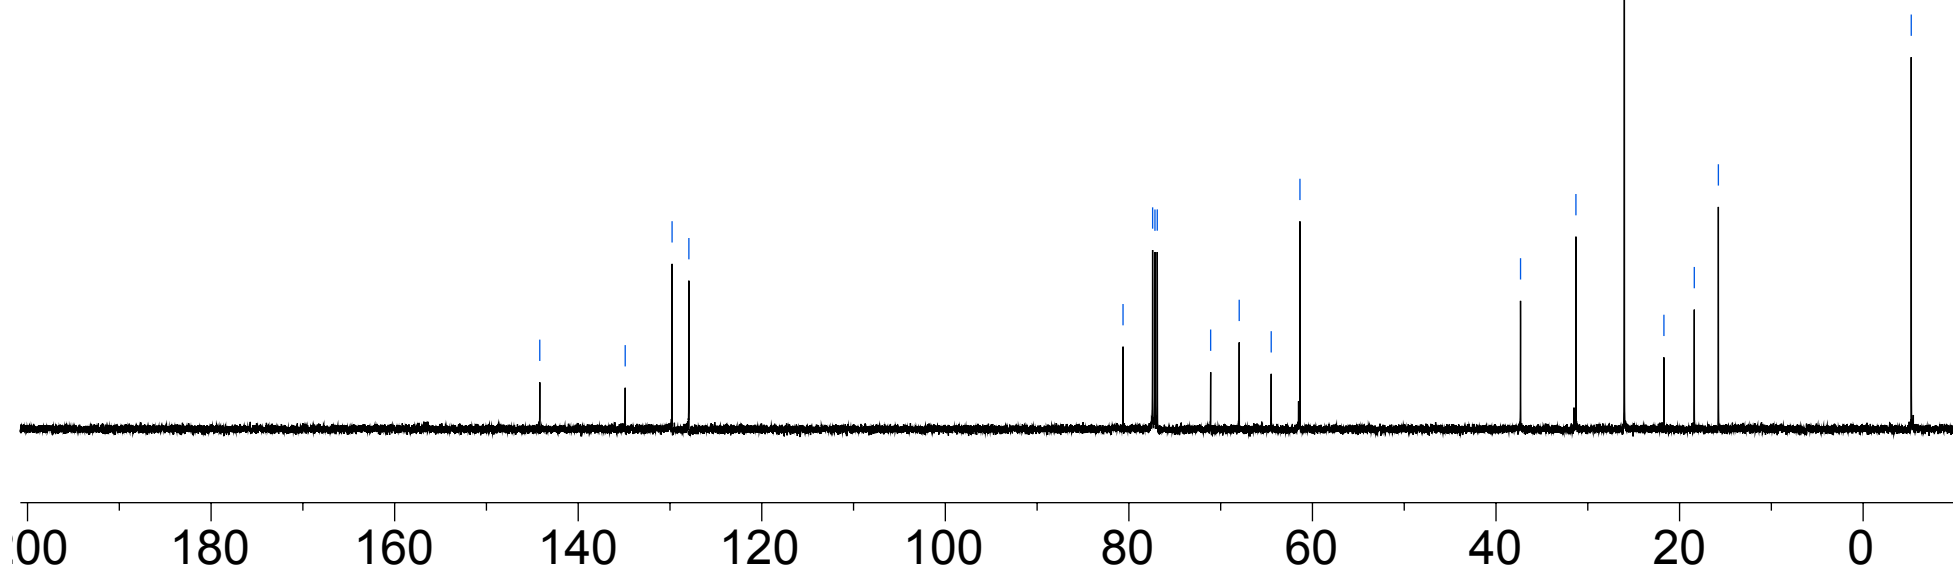

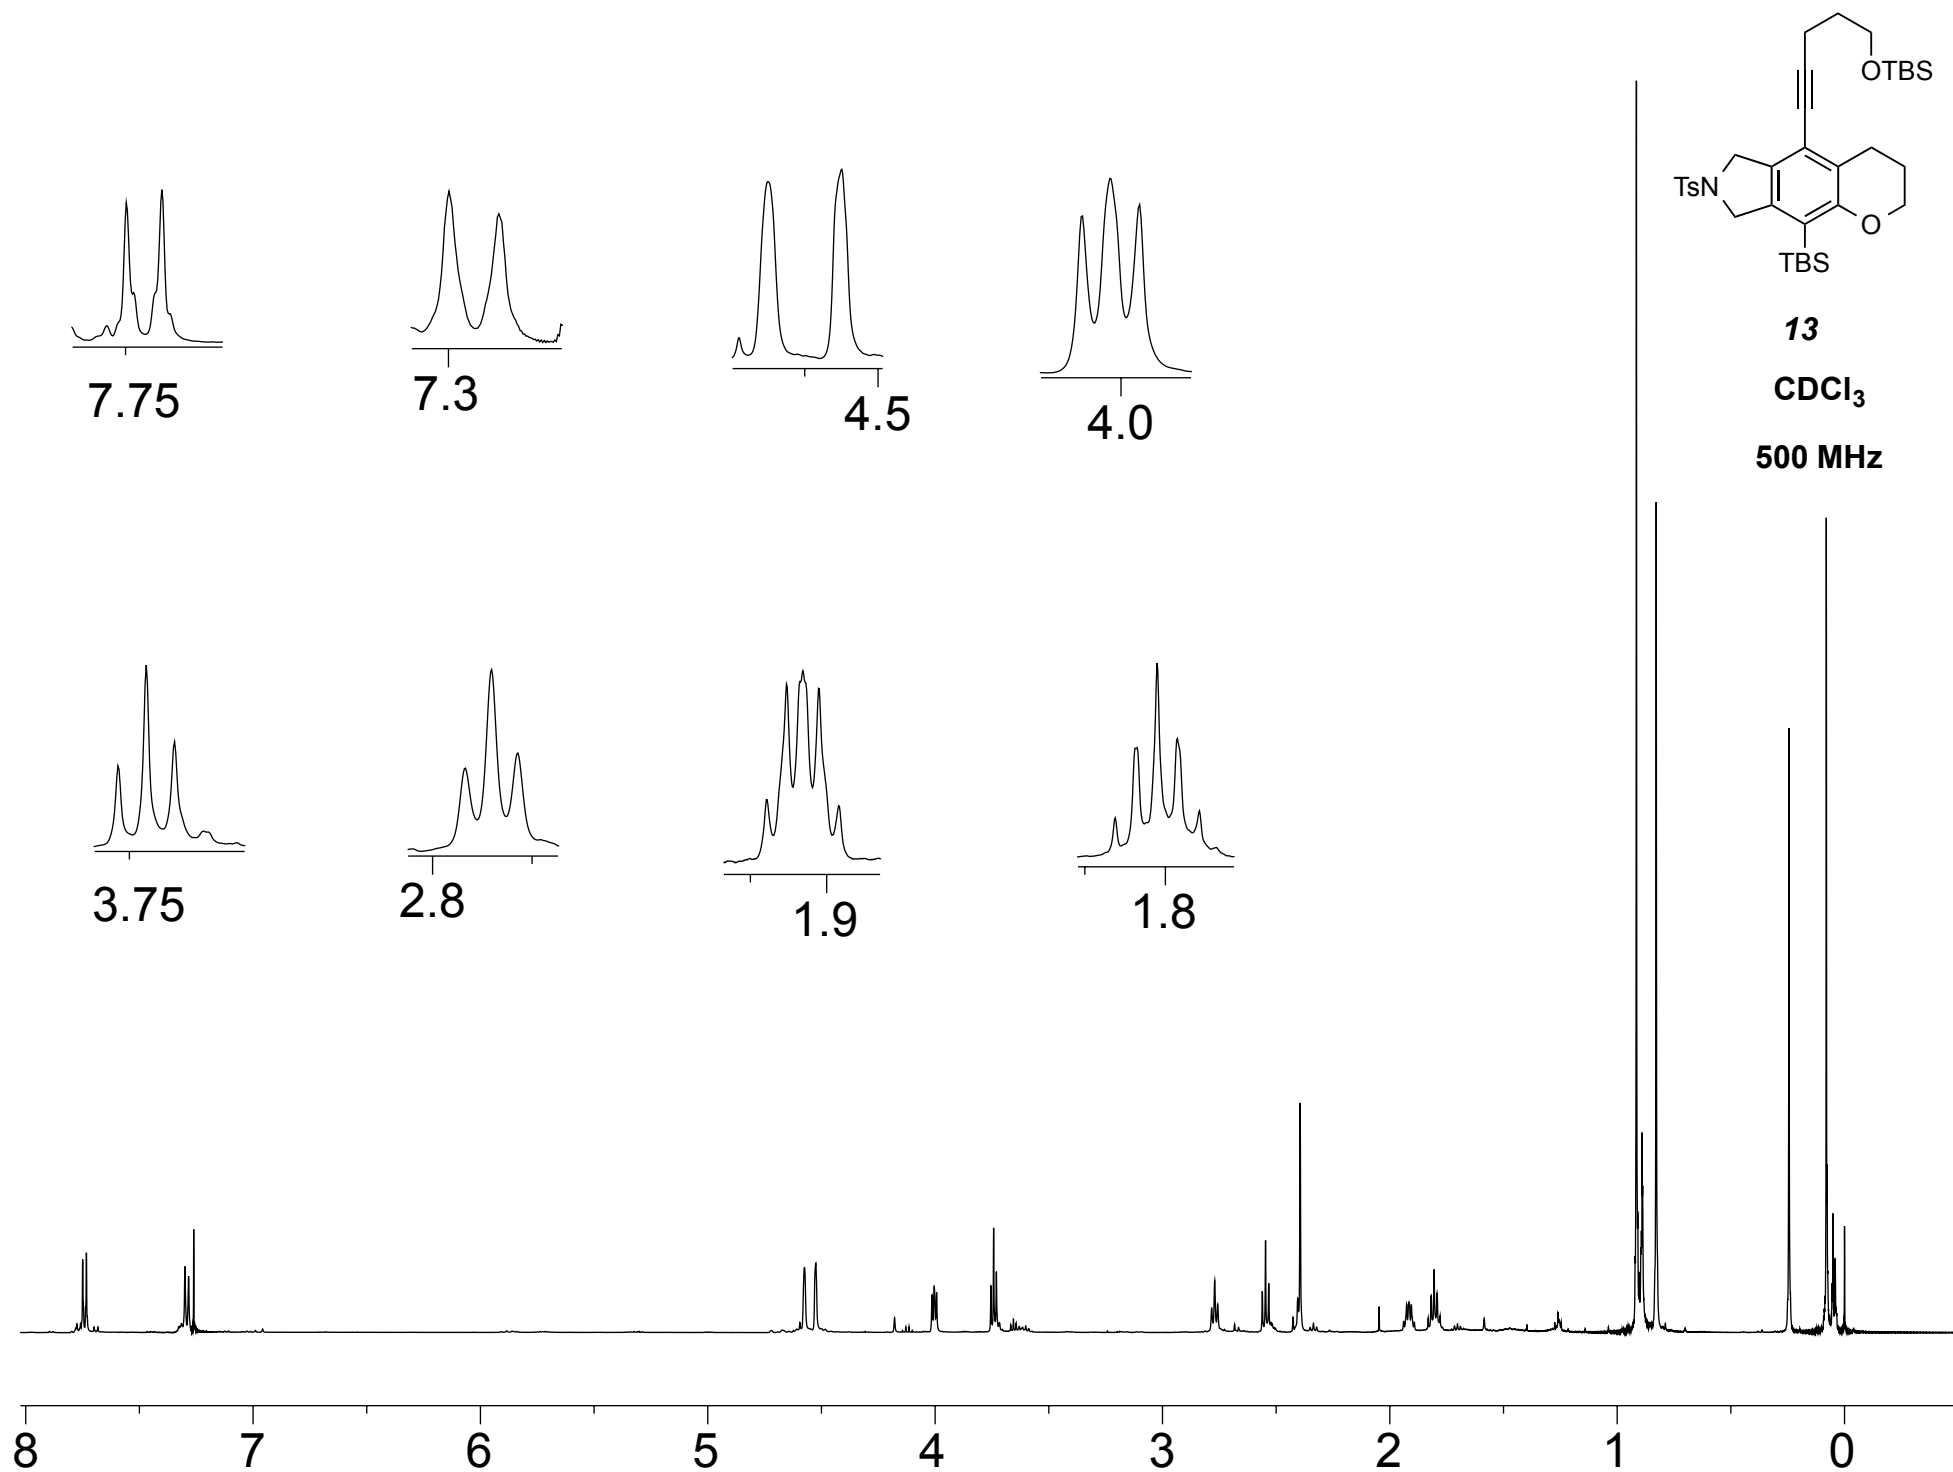

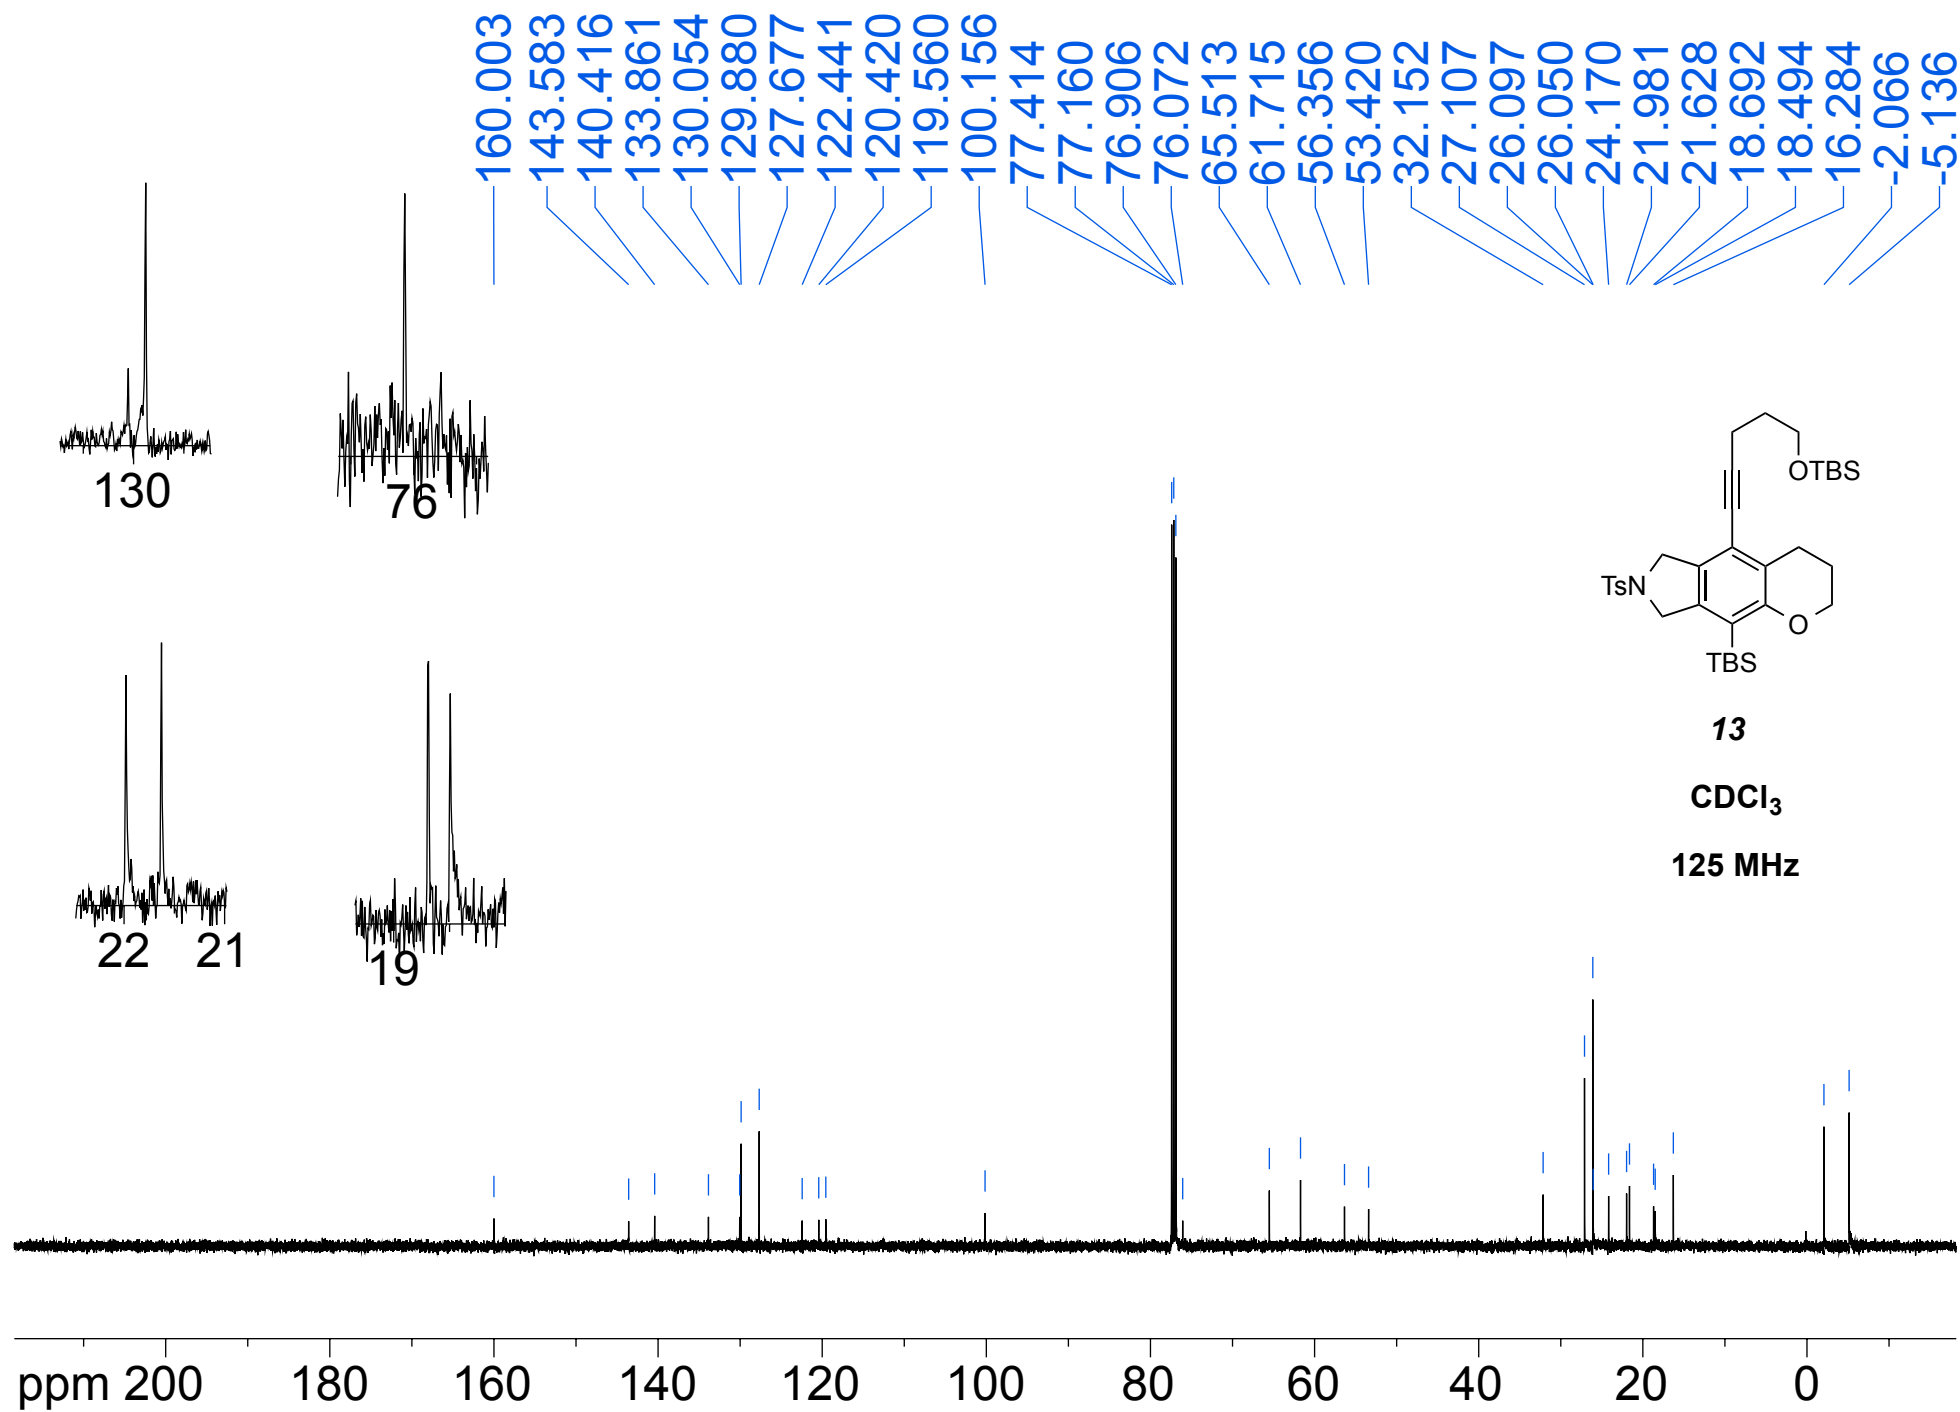

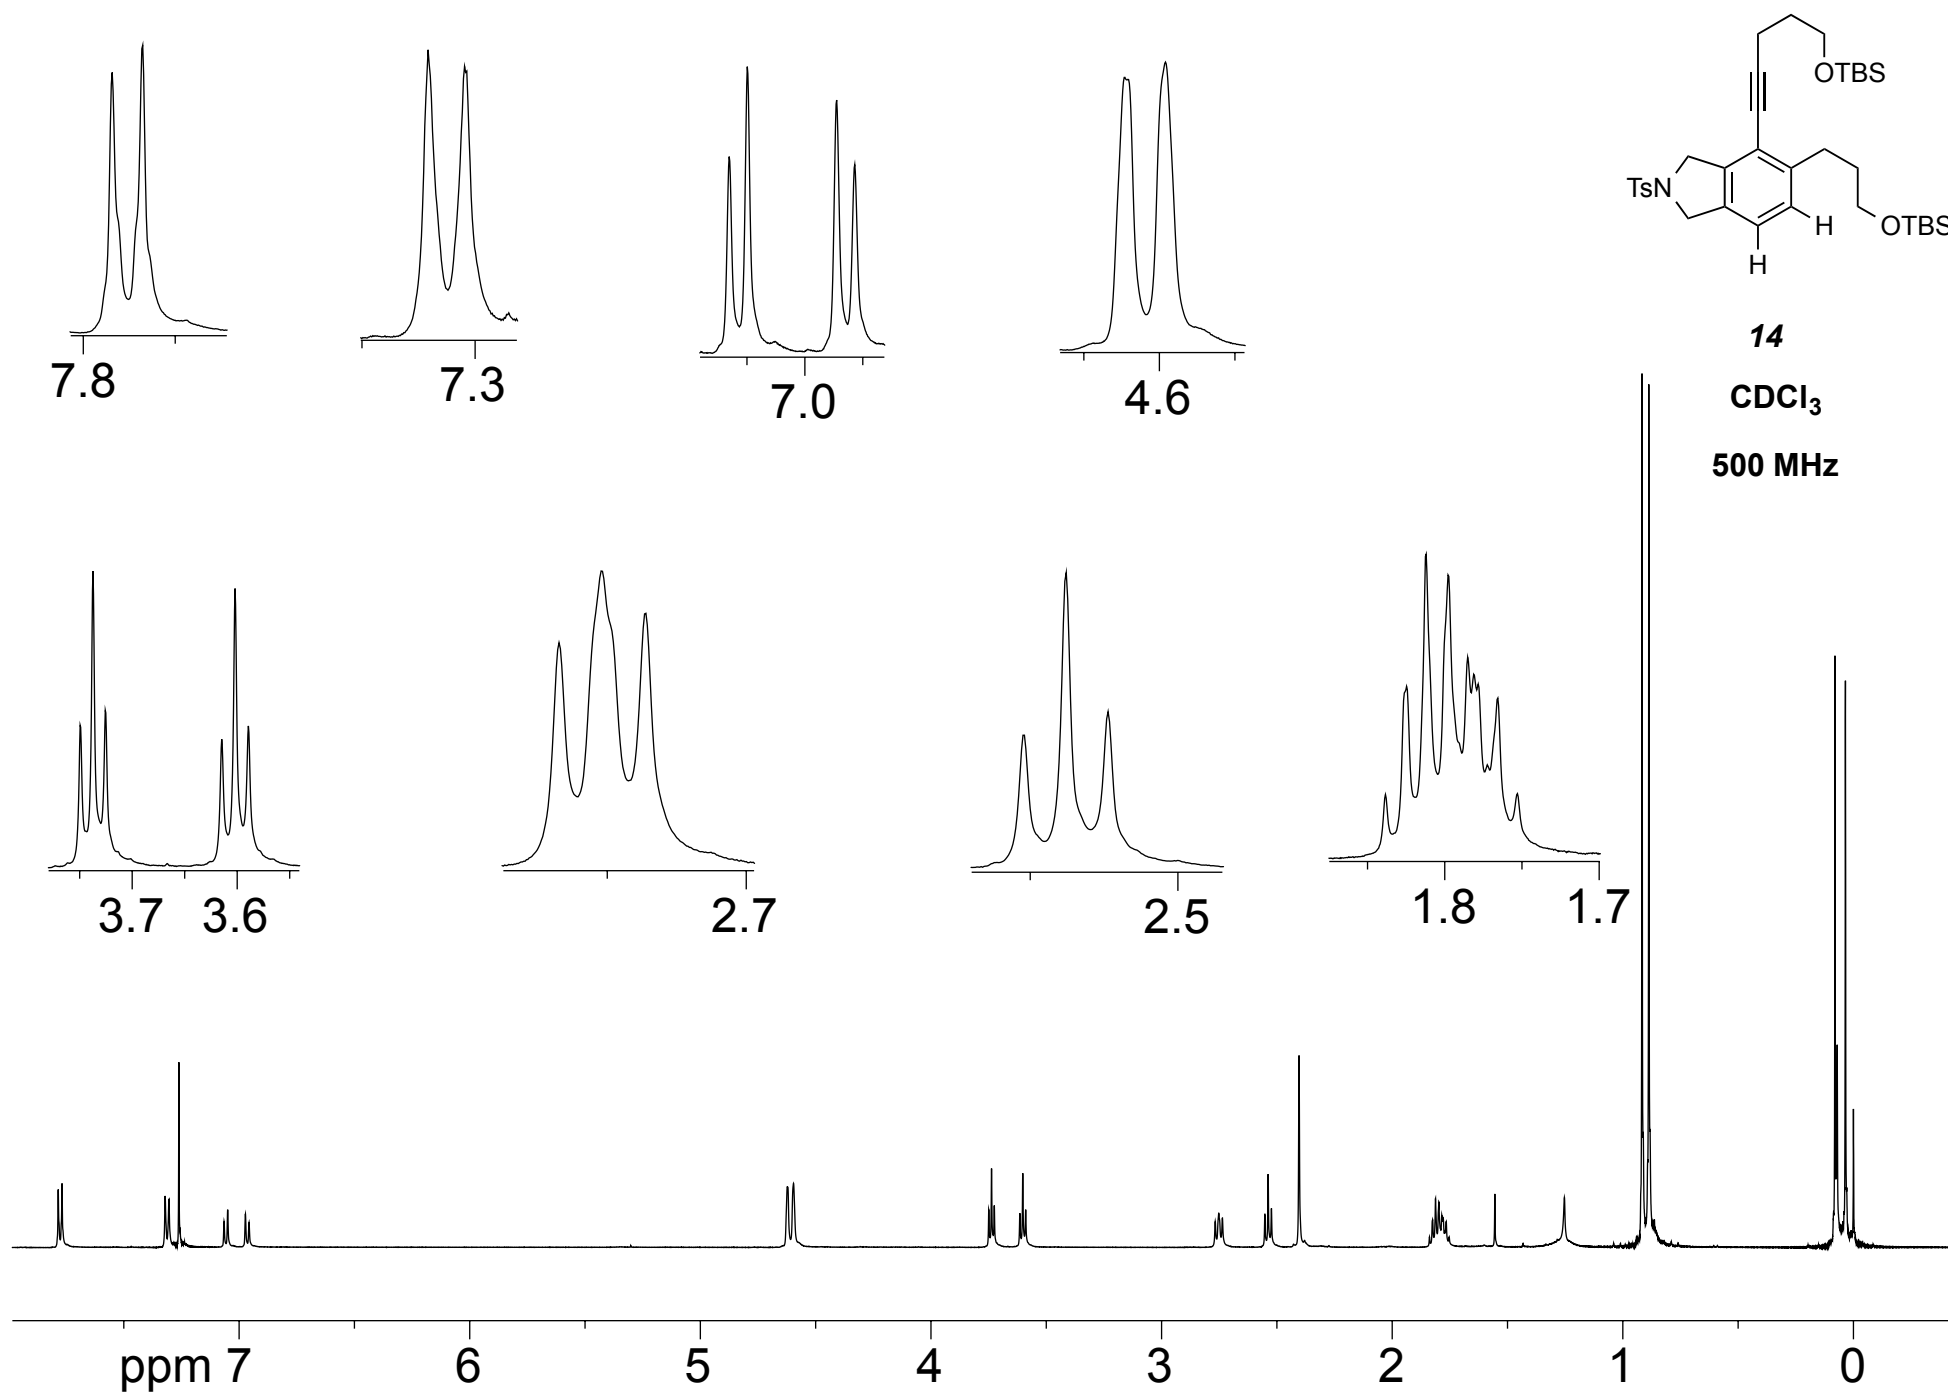

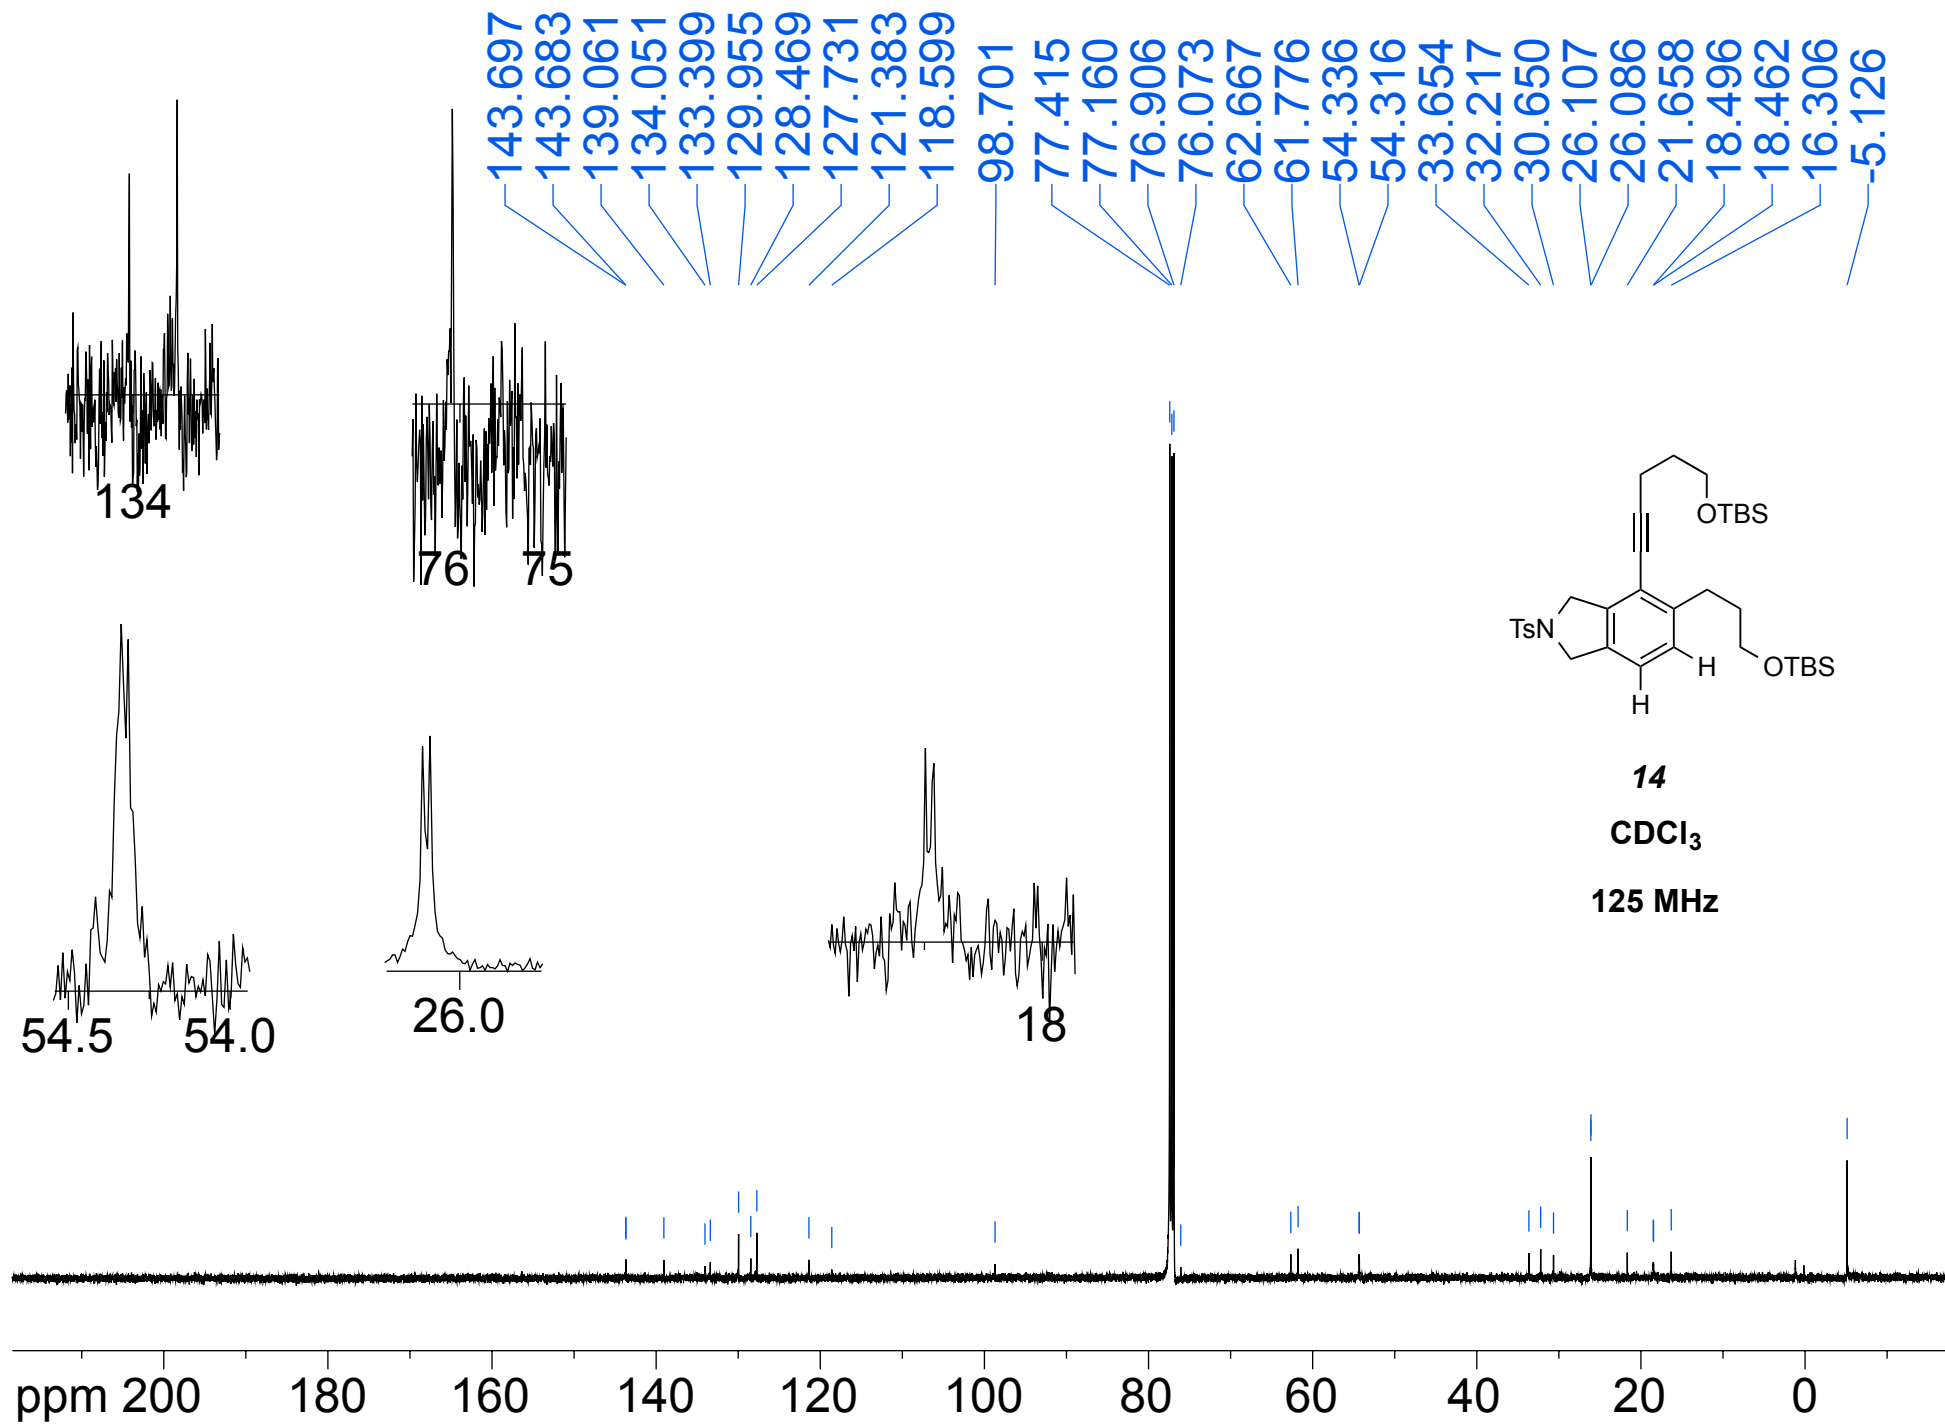

Supplement: NIHMS587934-supplement-SI_for_Retro-Brook.pdf [file NIHMS587934-supplement-SI_for_Retro-Brook.pdf]
